# Supplementary material for: Theoretical structural and spectroscopic characterization of peroxyacetic acid (CH3–CO–OOH): study of the far infrared region
Source: Royal Society of Chemistry journal article supplement (doi:10.1039/d3cp05783f), 2024-01-01
Supplement: d3cp05783f1.pdf [file d3cp05783f1.pdf]

### Supporting Information for:

Theoretical structural and spectroscopic characterization of Peroxyacetic Acid (CH<sub>3</sub>-CO-OOH).

Study of the Far Infrared region.

Sinda Brahem<sup>a</sup>, Dorsaf Missaoui<sup>a</sup>, Ounaies Yazidi<sup>a</sup>, Faouzi Najar<sup>a</sup>, María Luisa Senent<sup>b\*</sup>

<sup>a</sup>Laboratoire de Spectroscopie Atomique Moléculaire et Applications, Faculté des Sciences de Tunis, Université de Tunis El Manar, 2092 Tunisia.

<sup>b</sup>Departamento de Química y Física Teóricas, Instituto de Estructura de la Materia, IEM-CSIC, Serrano 121, Madrid 28006; Unidad Asociada GIFMAN, CSIC-UHU, Spain; E\_mail: ml.senent@csic.es

**Table S1**

**CCSD(T)-F12/CVTZ-F12 and MP2/AVTZ minimum energy structures**

#### **PAA-Cc**

**CCSD(T)-F12/CVTZ-F12 ENERGY=-304.21197782**

|   |               |               |               |
|---|---------------|---------------|---------------|
| C | 0.0000000048  | -0.1270278788 | 0.4802281595  |
| C | 0.0000000153  | 0.5297281555  | 1.8221135612  |
| O | 0.0000000078  | 0.7890532268  | -0.5065815991 |
| O | -0.0000000052 | -1.3117179598 | 0.2537162843  |
| O | -0.0000000023 | 0.1438362625  | -1.7880553691 |
| H | -0.0000000084 | -0.7954638826 | -1.5062798488 |
| H | 0.0000000232  | 1.6110710663  | 1.7333632272  |
| H | -0.8810500518 | 0.1994724017  | 2.3668042306  |
| H | 0.8810497929  | 0.1994720810  | 2.3668044780  |

#### **PAA-Ct**

**CCSD(T)-F12/CVTZ-F12 ENERGY=-304.20346221**

|   |               |               |               |
|---|---------------|---------------|---------------|
| C | -0.0000320237 | -0.1440012020 | 0.4923338945  |
| C | 0.0000569015  | 0.6138273771  | 1.7894451234  |
| O | -0.0000832954 | 0.7527834382  | -0.5344128188 |
| O | -0.0000284064 | -1.3282686985 | 0.3560516743  |
| O | 0.0000976390  | 0.0263497878  | -1.7847031707 |
| H | -0.0003287029 | 0.7890775549  | -2.3750506737 |
| H | -0.8809333189 | 0.3207642671  | 2.3549347965  |
| H | 0.8807693265  | 0.3201833175  | 2.3550644878  |
| H | 0.0004194656  | 1.6879738380  | 1.6349339427  |

**PAA-Ttg**

**CCSD (T) -F12/CVTZ-F12 ENERGY=-304.20198084**

|   |               |               |               |
|---|---------------|---------------|---------------|
| C | -0.0296771796 | -0.0034034798 | -0.5835185054 |
| C | 1.4574427171  | -0.0050912063 | -0.4256380566 |
| O | -0.7935220679 | 0.0200923504  | 0.5576558833  |
| O | -0.6357662461 | -0.0080092211 | -1.6136582386 |
| O | 0.0432624033  | 0.0323740940  | 1.7425350290  |
| H | -0.4623932777 | -0.5848504513 | 2.2833954784  |
| H | 1.8916218815  | 0.0182363180  | -1.4185990857 |
| H | 1.7787252692  | 0.8570879272  | 0.1534394666  |
| H | 1.7791396911  | -0.8949336069 | 0.1096771165  |

**PAA-Cc (MP2/AVTZ)**

|   |   |              |   |              |                 |
|---|---|--------------|---|--------------|-----------------|
| C |   |              |   |              |                 |
| C | 1 | 1.498200 (1) |   |              |                 |
| O | 1 | 1.359800 (2) | 2 | 110.417 (9)  |                 |
| O | 1 | 1.220900 (3) | 2 | 127.105 (10) | 3 180.000 (16)  |
| O | 3 | 1.456000 (4) | 1 | 110.144 (11) | 2 180.000 (17)  |
| H | 5 | 0.984800 (5) | 3 | 99.284 (12)  | 1 0.000 (18)    |
| H | 2 | 1.085100 (6) | 1 | 111.330 (13) | 3 0.000 (19)    |
| H | 2 | 1.087400 (7) | 1 | 108.539 (14) | 7 121.280 (20)  |
| H | 2 | 1.087400 (8) | 1 | 108.539 (15) | 7 -121.280 (21) |

**PAA-Ct (MP2/AVTZ)**

|   |   |              |   |              |                 |
|---|---|--------------|---|--------------|-----------------|
| C |   |              |   |              |                 |
| C | 1 | 1.506900 (1) |   |              |                 |
| O | 1 | 1.377300 (2) | 2 | 107.553 (9)  |                 |
| O | 1 | 1.207500 (3) | 2 | 127.370 (10) | 3 181.799 (16)  |
| O | 3 | 1.468800 (4) | 1 | 108.081 (11) | 2 183.006 (17)  |
| H | 5 | 0.971000 (5) | 3 | 96.091 (12)  | 1 187.435 (18)  |
| H | 2 | 1.088600 (6) | 1 | 108.761 (13) | 3 92.894 (19)   |
| H | 2 | 1.085600 (7) | 1 | 108.322 (14) | 7 118.027 (20)  |
| H | 2 | 1.086000 (8) | 1 | 111.650 (15) | 7 -120.172 (21) |

**PAA-Ttg (MP2/AVTZ)**

|   |   |              |   |              |                 |
|---|---|--------------|---|--------------|-----------------|
| C |   |              |   |              |                 |
| C | 1 | 1.499900 (1) |   |              |                 |
| O | 1 | 1.387500 (2) | 2 | 117.621 (9)  |                 |
| O | 1 | 1.211000 (3) | 2 | 126.795 (10) | 3 179.396 (16)  |
| O | 3 | 1.471800 (4) | 1 | 110.244 (11) | 2 -0.122 (17)   |
| H | 5 | 0.970500 (5) | 3 | 97.183 (12)  | 1 219.824 (18)  |
| H | 2 | 1.084600 (6) | 1 | 107.409 (13) | 3 181.196 (19)  |
| H | 2 | 1.087100 (7) | 1 | 110.455 (14) | 7 120.602 (20)  |
| H | 2 | 1.086700 (8) | 1 | 110.435 (15) | 7 -120.614 (21) |

**Table S2**

**Expansion coefficients of the 3D-Potential Energy Surface (in  $\text{cm}^{-1}$ )**  
(positive values of the M, L and K index denote cosine functions;  
negative values denote sine functions)

| $A_{MLK}$ | M  | L  | K  | $A_{MLK}$ | M  | L  | K  |
|-----------|----|----|----|-----------|----|----|----|
| 4432.348  | 0  | 0  | 0  | 164.527   | 3  | 0  | 0  |
| -0.789    | 6  | 0  | 0  | 652.049   | 0  | 1  | 0  |
| -2126.888 | 0  | 2  | 0  | 339.762   | 0  | 3  | 0  |
| 100.403   | 0  | 4  | 0  | 564.904   | 0  | 0  | 1  |
| 369.374   | 0  | 0  | 2  | 6.913     | 0  | 0  | 3  |
| -6.499    | 0  | 0  | 4  | 61.554    | 3  | 1  | 0  |
| -45.135   | 3  | 2  | 0  | 121.356   | 3  | 3  | 0  |
| 46.589    | 3  | 4  | 0  | -5.103    | 6  | 1  | 0  |
| -4.951    | 6  | 2  | 0  | -8.429    | 6  | 3  | 0  |
| -6.595    | 6  | 4  | 0  | -91.847   | -3 | -1 | 0  |
| 68.057    | -3 | -2 | 0  | -138.752  | -3 | -3 | 0  |
| -8.927    | 3  | 0  | 1  | -0.825    | 3  | 0  | 2  |
| -1.190    | 3  | 0  | 3  | 0.195     | 3  | 0  | 4  |
| 1.333     | 6  | 0  | 1  | -0.317    | 6  | 0  | 2  |
| -1.395    | 6  | 0  | 3  | -0.693    | 6  | 0  | 4  |
| -0.545    | -3 | 0  | -1 | -2.605    | -3 | 0  | -2 |
| -1.772    | -3 | 0  | -3 | 976.139   | 0  | 1  | 1  |
| 366.125   | 0  | 1  | 2  | 74.582    | 0  | 1  | 3  |
| 17.931    | 0  | 1  | 4  | -319.321  | 0  | 2  | 1  |
| -339.850  | 0  | 2  | 2  | -84.583   | 0  | 2  | 3  |
| -35.088   | 0  | 2  | 4  | 48.564    | 0  | 3  | 1  |
| 71.742    | 0  | 3  | 2  | 39.968    | 0  | 3  | 3  |
| 14.410    | 0  | 3  | 4  | 34.889    | 0  | 4  | 1  |
| 35.680    | 0  | 4  | 2  | 10.788    | 0  | 4  | 3  |
| 1.056     | 0  | 4  | 4  | -571.714  | 0  | -1 | -1 |
| -292.337  | 0  | -1 | -2 | -36.732   | 0  | -1 | -3 |
| 300.196   | 0  | -2 | -1 | 152.892   | 0  | -2 | -2 |
| 60.747    | 0  | -2 | -3 | -109.283  | 0  | -3 | -1 |
| -56.080   | 0  | -3 | -2 | -39.827   | 0  | -3 | -3 |
| -0.037    | 3  | 1  | 1  | -0.305    | 3  | 1  | 2  |
| -1.248    | 3  | 1  | 3  | 0.421     | 3  | 1  | 4  |
| 18.343    | 3  | 2  | 1  | 3.387     | 3  | 2  | 2  |
| 1.417     | 3  | 2  | 3  | 0.211     | 3  | 2  | 4  |
| 31.789    | 3  | 3  | 1  | 29.086    | 3  | 3  | 2  |
| 12.999    | 3  | 3  | 3  | 1.099     | 3  | 3  | 4  |
| 12.015    | 3  | 4  | 1  | 13.625    | 3  | 4  | 2  |
| 8.060     | 3  | 4  | 3  | 0.142     | 3  | 4  | 4  |
| -0.796    | 6  | 1  | 1  | -0.520    | 6  | 1  | 2  |
| -0.485    | 6  | 1  | 3  | -0.080    | 6  | 1  | 4  |
| -4.438    | 6  | 2  | 1  | -0.533    | 6  | 2  | 2  |
| 1.674     | 6  | 2  | 3  | 1.428     | 6  | 2  | 4  |
| -2.874    | 6  | 3  | 1  | -0.966    | 6  | 3  | 2  |
| -0.188    | 6  | 3  | 3  | -0.003    | 6  | 3  | 4  |
| -0.255    | 6  | 4  | 1  | -0.687    | 6  | 4  | 2  |
| -1.163    | 6  | 4  | 3  | -0.638    | 6  | 4  | 4  |
| 0.346     | 3  | -1 | -1 | -4.696    | 3  | -1 | -2 |
| 2.246     | 3  | -1 | -3 | -19.471   | 3  | -2 | -1 |
| -9.874    | 3  | -2 | -2 | 4.560     | 3  | -2 | -3 |
| -39.600   | 3  | -3 | -1 | -11.248   | 3  | -3 | -2 |
| 1.649     | 3  | -3 | -3 | -3.659    | 6  | -1 | -1 |
| -3.169    | 6  | -1 | -2 | -2.329    | 6  | -1 | -3 |

|         |    |    |    |         |    |    |    |
|---------|----|----|----|---------|----|----|----|
| -0.513  | 6  | -2 | -1 | 0.317   | 6  | -2 | -2 |
| -0.723  | 6  | -2 | -3 | 3.151   | 6  | -3 | -1 |
| 3.974   | 6  | -3 | -2 | 1.594   | 6  | -3 | -3 |
| -7.209  | -3 | -1 | 1  | -3.312  | -3 | -1 | 2  |
| -3.418  | -3 | -1 | 3  | -1.893  | -3 | -1 | 4  |
| -15.936 | -3 | -2 | 1  | 6.738   | -3 | -2 | 2  |
| 6.851   | -3 | -2 | 3  | 2.860   | -3 | -2 | 4  |
| -31.874 | -3 | -3 | 1  | -14.170 | -3 | -3 | 2  |
| 5.911   | -3 | -3 | 3  | 3.835   | -3 | -3 | 4  |
| -11.353 | -3 | 1  | -1 | -7.732  | -3 | 1  | -2 |
| -1.681  | -3 | 1  | -3 | -8.705  | -3 | 2  | -1 |
| -7.381  | -3 | 2  | -2 | -1.197  | -3 | 2  | -3 |
| -52.402 | -3 | 3  | -1 | -32.313 | -3 | 3  | -2 |
| -17.463 | -3 | 3  | -3 | -29.385 | -3 | 4  | -1 |
| -17.439 | -3 | 4  | -2 | -13.453 | -3 | 4  | -3 |

**Table S3**

**Expansion coefficients of the kinetic energy parameters ( $\text{cm}^{-1}$ )**  
(positive values of the M, L and K index denote cosine functions;  
negative values denote sine functions)

| $B_{\theta\theta}$ | $B_{\alpha\alpha}$ | $B_{\beta\beta}$ | $B_{\theta\alpha}$ | $B_{\theta\beta}$ | $B_{\alpha\beta}$ | <b>M</b> | <b>L</b> | <b>K</b> |
|--------------------|--------------------|------------------|--------------------|-------------------|-------------------|----------|----------|----------|
| 5.6243             | 1.5428             | 20.0919          | -0.1618            | 0.0009            | -0.7741           | 0        | 0        | 0        |
| 0.0105             | 0.0030             | -0.0073          | 0.0010             | -0.0001           | 0.0005            | 3        | 0        | 0        |
| -0.0001            | 0.0002             | 0.0008           | -0.0005            | -0.0003           | -0.0004           | 6        | 0        | 0        |
| 0.0287             | 0.1075             | 0.2114           | -0.5046            | 0.4924            | -0.1070           | 0        | 1        | 0        |
| 0.1208             | 0.3369             | 0.2561           | -0.0150            | 0.0068            | -0.3473           | 0        | 2        | 0        |
| 0.0021             | 0.0286             | 0.0232           | -0.0621            | 0.0590            | -0.0303           | 0        | 3        | 0        |
| 0.0087             | 0.0123             | 0.0038           | -0.0029            | 0.0025            | -0.0039           | 0        | 4        | 0        |
| 0.0110             | 0.0745             | 1.0941           | -0.0064            | 0.0033            | -1.0528           | 0        | 0        | 1        |
| 0.0025             | 0.0504             | 0.4952           | -0.0020            | 0.0020            | -0.0783           | 0        | 0        | 2        |
| 0.0004             | 0.0087             | 0.0547           | -0.0005            | 0.0011            | -0.0260           | 0        | 0        | 3        |
| 0.0001             | 0.0014             | 0.0095           | -0.0001            | 0.0003            | -0.0034           | 0        | 0        | 4        |
| 0.0040             | 0.0132             | 0.0013           | -0.0018            | 0.0012            | -0.0081           | 3        | 1        | 0        |
| -0.0001            | 0.0130             | 0.0092           | -0.0027            | 0.0007            | -0.0116           | 3        | 2        | 0        |
| 0.0058             | 0.0160             | 0.0103           | -0.0047            | 0.0011            | -0.0147           | 3        | 3        | 0        |
| 0.0020             | 0.0087             | 0.0031           | -0.0025            | 0.0009            | -0.0072           | 3        | 4        | 0        |
| -0.0010            | 0.0001             | 0.0008           | -0.0004            | 0.0000            | -0.0004           | 6        | 1        | 0        |
| -0.0005            | -0.0005            | 0.0002           | 0.0006             | -0.0003           | 0.0003            | 6        | 2        | 0        |
| -0.0003            | -0.0009            | -0.0004          | -0.0000            | -0.0003           | 0.0008            | 6        | 3        | 0        |
| -0.0005            | -0.0007            | -0.0007          | -0.0003            | 0.0003            | 0.0007            | 6        | 4        | 0        |
| -0.0084            | -0.0095            | -0.0094          | 0.0103             | -0.0088           | 0.0069            | -3       | -1       | 0        |
| -0.0039            | -0.0224            | -0.0162          | 0.0022             | -0.0011           | 0.0210            | -3       | -2       | 0        |
| -0.0060            | -0.0114            | -0.0106          | 0.0055             | -0.0020           | 0.0127            | -3       | -3       | 0        |
| -0.0001            | -0.0007            | -0.0042          | -0.0000            | -0.0002           | 0.0015            | 3        | 0        | 1        |
| -0.0002            | -0.0001            | -0.0017          | 0.0002             | -0.0001           | 0.0002            | 3        | 0        | 2        |
| -0.0002            | -0.0006            | -0.0006          | 0.0001             | -0.0001           | 0.0007            | 3        | 0        | 3        |
| -0.0000            | -0.0001            | -0.0003          | 0.0000             | -0.0000           | 0.0002            | 3        | 0        | 4        |
| -0.0000            | 0.0001             | 0.0016           | 0.0000             | -0.0000           | -0.0002           | 6        | 0        | 1        |
| 0.0000             | -0.0001            | 0.0006           | 0.0000             | -0.0000           | 0.0000            | 6        | 0        | 2        |
| -0.0000            | 0.0000             | 0.0004           | 0.0000             | -0.0000           | -0.0001           | 6        | 0        | 3        |
| 0.0000             | 0.0000             | 0.0003           | -0.0000            | 0.0000            | -0.0000           | 6        | 0        | 4        |
| 0.0006             | -0.0002            | -0.0002          | -0.0001            | 0.0022            | 0.0012            | -3       | 0        | -1       |
| 0.0004             | 0.0000             | -0.0002          | -0.0001            | 0.0000            | -0.0001           | -3       | 0        | -2       |
| 0.0001             | -0.0004            | -0.0010          | 0.0001             | 0.0001            | 0.0003            | -3       | 0        | -3       |
| 0.0122             | 0.0491             | 0.3644           | -0.0200            | 0.0714            | -0.0758           | 0        | 1        | 1        |

|         |         |         |         |         |         |   |    |    |
|---------|---------|---------|---------|---------|---------|---|----|----|
| 0.0021  | 0.0220  | 0.2258  | -0.0085 | 0.0190  | -0.0397 | 0 | 1  | 2  |
| 0.0005  | 0.0059  | 0.0923  | -0.0023 | 0.0039  | -0.0159 | 0 | 1  | 3  |
| -0.0002 | 0.0012  | 0.0262  | -0.0001 | 0.0001  | -0.0044 | 0 | 1  | 4  |
| 0.0053  | 0.0241  | 0.1383  | -0.0083 | 0.0067  | -0.0612 | 0 | 2  | 1  |
| 0.0086  | 0.0028  | -0.0906 | -0.0052 | 0.0029  | 0.0007  | 0 | 2  | 2  |
| 0.0013  | 0.0028  | -0.0862 | -0.0015 | 0.0010  | 0.0030  | 0 | 2  | 3  |
| 0.0003  | -0.0007 | -0.0360 | -0.0003 | 0.0004  | 0.0034  | 0 | 2  | 4  |
| 0.0011  | 0.0155  | 0.0440  | 0.0022  | 0.0012  | -0.0218 | 0 | 3  | 1  |
| 0.0019  | 0.0114  | 0.0410  | 0.0010  | -0.0011 | -0.0130 | 0 | 3  | 2  |
| 0.0010  | 0.0063  | 0.0433  | 0.0003  | 0.0001  | -0.0078 | 0 | 3  | 3  |
| 0.0003  | 0.0020  | 0.0200  | 0.0004  | -0.0004 | -0.0037 | 0 | 3  | 4  |
| -0.0016 | -0.0043 | -0.0150 | -0.0018 | 0.0025  | 0.0064  | 0 | 4  | 1  |
| -0.0005 | -0.0005 | 0.0196  | -0.0019 | 0.0019  | -0.0003 | 0 | 4  | 2  |
| -0.0002 | 0.0003  | 0.0044  | -0.0010 | 0.0006  | -0.0012 | 0 | 4  | 3  |
| -0.0001 | -0.0004 | -0.0020 | -0.0004 | 0.0003  | 0.0004  | 0 | 4  | 4  |
| -0.0102 | -0.0210 | -0.0828 | 0.0100  | 0.2809  | -0.0244 | 0 | -1 | -1 |
| -0.0030 | -0.0143 | -0.1223 | -0.0140 | 0.0081  | 0.0251  | 0 | -1 | -2 |
| -0.0011 | -0.0053 | -0.0533 | -0.0001 | 0.0054  | 0.0088  | 0 | -1 | -3 |
| -0.0090 | -0.0168 | 0.1550  | 0.0060  | 0.0038  | -0.1208 | 0 | -2 | -1 |
| -0.0029 | 0.0166  | 0.1077  | 0.0051  | -0.0018 | -0.0085 | 0 | -2 | -2 |
| -0.0014 | -0.0025 | 0.0513  | 0.0019  | -0.0004 | -0.0077 | 0 | -2 | -3 |
| -0.0008 | -0.0089 | 0.0227  | 0.0017  | 0.0287  | -0.0001 | 0 | -3 | -1 |
| -0.0015 | -0.0070 | -0.0372 | -0.0035 | 0.0015  | 0.0042  | 0 | -3 | -2 |
| -0.0008 | -0.0048 | -0.0272 | 0.0002  | 0.0008  | 0.0060  | 0 | -3 | -3 |
| 0.0032  | -0.0001 | -0.0007 | -0.0010 | -0.0009 | 0.0000  | 3 | 1  | 1  |
| 0.0005  | -0.0005 | -0.0071 | 0.0000  | -0.0003 | 0.0008  | 3 | 1  | 2  |
| -0.0002 | -0.0005 | -0.0033 | 0.0003  | -0.0003 | 0.0009  | 3 | 1  | 3  |
| -0.0001 | 0.0000  | -0.0001 | 0.0001  | -0.0001 | 0.0002  | 3 | 1  | 4  |
| 0.0057  | 0.0017  | 0.0085  | -0.0008 | -0.0017 | -0.0025 | 3 | 2  | 1  |
| 0.0035  | 0.0002  | -0.0065 | -0.0005 | -0.0003 | 0.0008  | 3 | 2  | 2  |
| 0.0008  | 0.0003  | -0.0044 | -0.0002 | 0.0001  | 0.0004  | 3 | 2  | 3  |
| 0.0003  | 0.0000  | -0.0013 | -0.0000 | 0.0000  | 0.0002  | 3 | 2  | 4  |
| 0.0049  | 0.0027  | 0.0146  | -0.0001 | -0.0017 | -0.0036 | 3 | 3  | 1  |
| 0.0067  | 0.0018  | 0.0043  | -0.0006 | -0.0007 | -0.0011 | 3 | 3  | 2  |
| 0.0027  | 0.0021  | 0.0055  | -0.0006 | 0.0004  | -0.0016 | 3 | 3  | 3  |
| 0.0009  | 0.0002  | 0.0008  | -0.0001 | 0.0001  | -0.0004 | 3 | 3  | 4  |
| 0.0020  | 0.0017  | 0.0060  | 0.0003  | -0.0012 | -0.0022 | 3 | 4  | 1  |
| 0.0037  | 0.0020  | 0.0052  | -0.0001 | -0.0005 | -0.0016 | 3 | 4  | 2  |
| 0.0019  | 0.0015  | 0.0045  | -0.0004 | 0.0002  | -0.0015 | 3 | 4  | 3  |
| 0.0006  | 0.0001  | 0.0003  | -0.0000 | 0.0000  | -0.0003 | 3 | 4  | 4  |
| -0.0004 | 0.0002  | 0.0021  | 0.0001  | -0.0000 | -0.0004 | 6 | 1  | 1  |
| -0.0001 | 0.0000  | 0.0012  | 0.0001  | -0.0001 | -0.0001 | 6 | 1  | 2  |
| -0.0000 | -0.0001 | 0.0011  | 0.0000  | 0.0000  | -0.0001 | 6 | 1  | 3  |
| 0.0001  | 0.0002  | 0.0013  | -0.0000 | -0.0000 | -0.0002 | 6 | 1  | 4  |
| -0.0005 | -0.0001 | 0.0000  | -0.0000 | -0.0000 | -0.0001 | 6 | 2  | 1  |
| -0.0001 | 0.0001  | 0.0013  | 0.0001  | -0.0002 | -0.0001 | 6 | 2  | 2  |
| 0.0001  | 0.0001  | 0.0013  | 0.0000  | -0.0001 | -0.0003 | 6 | 2  | 3  |
| 0.0001  | 0.0000  | 0.0007  | -0.0000 | -0.0000 | -0.0000 | 6 | 2  | 4  |
| -0.0002 | 0.0000  | -0.0010 | -0.0002 | 0.0000  | -0.0000 | 6 | 3  | 1  |
| 0.0001  | 0.0001  | 0.0011  | -0.0002 | -0.0001 | 0.0000  | 6 | 3  | 2  |
| 0.0000  | 0.0001  | 0.0002  | -0.0001 | -0.0001 | -0.0003 | 6 | 3  | 3  |
| 0.0000  | 0.0002  | 0.0005  | -0.0000 | -0.0001 | -0.0002 | 6 | 3  | 4  |
| -0.0000 | -0.0002 | -0.0006 | -0.0002 | 0.0002  | 0.0003  | 6 | 4  | 1  |
| 0.0001  | -0.0001 | 0.0004  | -0.0002 | -0.0000 | 0.0002  | 6 | 4  | 2  |
| -0.0000 | -0.0001 | -0.0006 | -0.0001 | -0.0000 | 0.0000  | 6 | 4  | 3  |
| 0.0000  | -0.0000 | -0.0000 | -0.0000 | -0.0000 | 0.0001  | 6 | 4  | 4  |
| -0.0021 | -0.0010 | -0.0004 | 0.0013  | 0.0017  | -0.0010 | 3 | -1 | -1 |
| -0.0010 | 0.0002  | 0.0039  | 0.0004  | -0.0003 | 0.0000  | 3 | -1 | -2 |

|         |         |         |         |         |         |    |    |    |
|---------|---------|---------|---------|---------|---------|----|----|----|
| -0.0000 | 0.0003  | 0.0024  | 0.0000  | 0.0000  | -0.0004 | 3  | -1 | -3 |
| -0.0055 | -0.0034 | -0.0092 | 0.0020  | 0.0002  | 0.0040  | 3  | -2 | -1 |
| -0.0039 | -0.0002 | 0.0014  | 0.0009  | -0.0003 | 0.0004  | 3  | -2 | -2 |
| -0.0004 | 0.0003  | 0.0039  | 0.0002  | -0.0002 | -0.0005 | 3  | -2 | -3 |
| -0.0056 | -0.0038 | -0.0039 | 0.0016  | 0.0002  | 0.0046  | 3  | -3 | -1 |
| -0.0040 | 0.0005  | -0.0027 | 0.0009  | -0.0003 | -0.0011 | 3  | -3 | -2 |
| -0.0007 | 0.0001  | 0.0023  | 0.0002  | -0.0003 | 0.0001  | 3  | -3 | -3 |
| 0.0001  | -0.0004 | -0.0009 | 0.0000  | -0.0003 | 0.0004  | 6  | -1 | -1 |
| -0.0000 | -0.0001 | -0.0010 | 0.0001  | 0.0001  | 0.0003  | 6  | -1 | -2 |
| -0.0000 | -0.0002 | -0.0011 | 0.0000  | -0.0000 | 0.0003  | 6  | -1 | -3 |
| 0.0002  | -0.0002 | -0.0010 | 0.0000  | 0.0004  | 0.0002  | 6  | -2 | -1 |
| 0.0003  | -0.0000 | -0.0003 | -0.0001 | 0.0001  | 0.0002  | 6  | -2 | -2 |
| 0.0000  | -0.0002 | -0.0003 | -0.0001 | 0.0001  | 0.0002  | 6  | -2 | -3 |
| 0.0003  | 0.0000  | 0.0003  | 0.0001  | 0.0004  | -0.0002 | 6  | -3 | -1 |
| 0.0004  | 0.0000  | 0.0004  | -0.0001 | 0.0001  | -0.0000 | 6  | -3 | -2 |
| 0.0001  | -0.0001 | 0.0004  | -0.0001 | 0.0001  | 0.0001  | 6  | -3 | -3 |
| -0.0034 | -0.0011 | -0.0109 | 0.0016  | -0.0008 | 0.0024  | -3 | -1 | 1  |
| -0.0007 | -0.0001 | 0.0029  | 0.0004  | -0.0004 | 0.0006  | -3 | -1 | 2  |
| 0.0001  | 0.0003  | 0.0001  | -0.0000 | -0.0000 | -0.0004 | -3 | -1 | 3  |
| 0.0001  | 0.0002  | 0.0004  | 0.0000  | -0.0000 | -0.0001 | -3 | -1 | 4  |
| -0.0061 | -0.0022 | -0.0188 | 0.0013  | 0.0007  | 0.0040  | -3 | -2 | 1  |
| -0.0033 | 0.0004  | 0.0088  | 0.0009  | -0.0004 | -0.0010 | -3 | -2 | 2  |
| 0.0001  | 0.0010  | 0.0074  | 0.0001  | -0.0002 | -0.0015 | -3 | -2 | 3  |
| 0.0003  | 0.0004  | 0.0028  | -0.0000 | -0.0001 | -0.0005 | -3 | -2 | 4  |
| -0.0045 | -0.0032 | -0.0209 | 0.0003  | 0.0011  | 0.0044  | -3 | -3 | 1  |
| -0.0039 | -0.0001 | 0.0004  | 0.0007  | 0.0002  | 0.0003  | -3 | -3 | 2  |
| -0.0002 | 0.0004  | 0.0026  | 0.0001  | -0.0002 | -0.0006 | -3 | -3 | 3  |
| 0.0003  | 0.0003  | 0.0016  | 0.0000  | -0.0001 | -0.0002 | -3 | -3 | 4  |
| -0.0020 | -0.0010 | -0.0003 | 0.0014  | 0.0038  | 0.0023  | -3 | 1  | -1 |
| -0.0006 | -0.0006 | 0.0007  | 0.0002  | -0.0001 | 0.0004  | -3 | 1  | -2 |
| 0.0000  | -0.0006 | -0.0005 | 0.0003  | 0.0000  | 0.0003  | -3 | 1  | -3 |
| -0.0056 | -0.0041 | -0.0050 | 0.0017  | -0.0001 | 0.0014  | -3 | 2  | -1 |
| -0.0044 | -0.0005 | 0.0036  | 0.0010  | -0.0001 | 0.0006  | -3 | 2  | -2 |
| -0.0009 | -0.0018 | 0.0012  | 0.0005  | -0.0002 | 0.0010  | -3 | 2  | -3 |
| -0.0063 | -0.0062 | -0.0037 | 0.0013  | 0.0017  | 0.0050  | -3 | 3  | -1 |
| -0.0071 | -0.0032 | -0.0117 | 0.0005  | 0.0007  | 0.0023  | -3 | 3  | -2 |
| -0.0026 | -0.0031 | -0.0090 | 0.0008  | -0.0004 | 0.0029  | -3 | 3  | -3 |
| -0.0027 | -0.0032 | -0.0043 | 0.0006  | 0.0006  | 0.0014  | -3 | 4  | -1 |
| -0.0036 | -0.0015 | -0.0097 | 0.0002  | 0.0005  | 0.0014  | -3 | 4  | -2 |
| -0.0017 | -0.0019 | -0.0069 | 0.0005  | -0.0002 | 0.0019  | -3 | 4  | -3 |

**Tabla S3a**

**Expansion coefficients of the 1D-Potential Energy Surface and the kinetic parameter corresponding to the torsion of the methyl group (in  $\text{cm}^{-1}$ )**

| $V_M(\theta)$ | $B_M(\theta)$ | M |
|---------------|---------------|---|
| 29.496        | 5.6470        | 0 |
| -37.127       | 0.0003        | 3 |
| 7.631         | 0.0008        | 6 |

**Tabla S3b**

**Expansion coefficients of the 1D-Potential Energy Surface and the kinetic parameter corresponding to the torsion of C-O single bond (in  $\text{cm}^{-1}$ )**

| $V_L(\alpha)$ | $B_L(\alpha)$ | L |
|---------------|---------------|---|
| 3054.848      | 1.4136        | 0 |
| 792.763       | 0.0574        | 1 |
| -2053.496     | 0.2558        | 2 |
| 257.506       | 0.0273        | 3 |
| 18.266        | 0.0043        | 4 |
| -17.705       | 0.0126        | 5 |
| 12.927        | 0.0093        | 6 |

**Tabla S3c**

**Expansion coefficients of the 1D-Potential Energy Surface and the kinetic parameter corresponding to the torsion of the OH group (in  $\text{cm}^{-1}$ )**

| $V_K(\beta)$ | $B_K(\beta)$ | K |
|--------------|--------------|---|
| 1318.880     | 19.2417      | 0 |
| -789.858     | -0.3256      | 1 |
| -327.329     | -0.1443      | 2 |
| -120.180     | -0.1249      | 3 |
| -57.448      | -0.0498      | 4 |
| -17.813      | -0.0145      | 5 |
| -6.266       | -0.0045      | 6 |
