# Supplementary material for: Theoretical structural and spectroscopic characterization of peroxyacetic acid (CH3–CO–OOH): study of the far infrared region
Source: Royal Society of Chemistry journal article supplement (doi:10.1039/d3cp05783f), 2024-01-01
Supplement: d3cp05783f2.pdf [file d3cp05783f2.pdf]

Supporting Information for: Theoretical structural and spectroscopic characterization of Peroxyacetic Acid (CH<sub>3</sub>-CO-OOH).

Study of the Far Infrared region.

Sinda Brahem, Dorsaf Missaoui, Ounaies Yazidi, Faouzi Najari, María Luisa Senent

Table S4

Potential Energy Surface. Selected geometries and energies

Geometry (MP2/AVTZ) 1

| Z-MATRIX (ANGSTROMS AND DEGREES) |      |      |    |              |    |              |    |               |   |
|----------------------------------|------|------|----|--------------|----|--------------|----|---------------|---|
| CD                               | Cent | Atom | N1 | Length/X     | N2 | Alpha/Y      | N3 | Beta/Z        | J |
| 1                                | 1    | C    |    |              |    |              |    |               |   |
| 2                                | 2    | C    | 1  | 1.493941( 1) |    |              |    |               |   |
| 3                                | 3    | O    | 1  | 1.353403( 2) | 2  | 110.565( 9)  |    |               |   |
| 4                                | 4    | O    | 1  | 1.213162( 3) | 2  | 127.314( 10) | 3  | 180.000( 16)  | 0 |
| 5                                | 5    | O    | 3  | 1.439708( 4) | 1  | 110.119( 11) | 2  | 180.000( 17)  | 0 |
| 6                                | 6    | H    | 5  | 0.985653( 5) | 3  | 99.679( 12)  | 1  | -0.000( 18)   | 0 |
| 7                                | 7    | H    | 2  | 1.085075( 6) | 1  | 111.425( 13) | 3  | -0.000( 19)   | 0 |
| 8                                | 8    | H    | 2  | 1.087577( 7) | 1  | 108.433( 14) | 7  | 121.362( 20)  | 0 |
| 9                                | 9    | H    | 2  | 1.087577( 8) | 1  | 108.433( 15) | 7  | -121.362( 21) | 0 |

-304.21180809 Energy CCSD(T)-F12/CVTA-F12

Geometry (MP2/AVTZ) 2

| Z-MATRIX (ANGSTROMS AND DEGREES) |      |      |    |              |    |              |    |               |   |
|----------------------------------|------|------|----|--------------|----|--------------|----|---------------|---|
| CD                               | Cent | Atom | N1 | Length/X     | N2 | Alpha/Y      | N3 | Beta/Z        | J |
| 1                                | 1    | C    |    |              |    |              |    |               |   |
| 2                                | 2    | C    | 1  | 1.494424( 1) |    |              |    |               |   |
| 3                                | 3    | O    | 1  | 1.353865( 2) | 2  | 110.361( 9)  |    |               |   |
| 4                                | 4    | O    | 1  | 1.213236( 3) | 2  | 127.518( 10) | 3  | 180.477( 16)  | 0 |
| 5                                | 5    | O    | 3  | 1.439634( 4) | 1  | 110.230( 11) | 2  | 180.000( 17)  | 0 |
| 6                                | 6    | H    | 5  | 0.985275( 5) | 3  | 99.641( 12)  | 1  | 0.000( 18)    | 0 |
| 7                                | 7    | H    | 2  | 1.088937( 6) | 1  | 108.597( 13) | 3  | 90.000( 19)   | 0 |
| 8                                | 8    | H    | 2  | 1.085186( 7) | 1  | 108.732( 14) | 7  | 118.476( 20)  | 0 |
| 9                                | 9    | H    | 2  | 1.085820( 8) | 1  | 110.922( 15) | 7  | -119.336( 21) | 0 |

-304.21161605 Energy CCSD(T)-F12/CVTA-F12

Geometry (MP2/AVTZ) 3

| Z-MATRIX (ANGSTROMS AND DEGREES) |      |      |    |              |    |              |    |              |   |
|----------------------------------|------|------|----|--------------|----|--------------|----|--------------|---|
| CD                               | Cent | Atom | N1 | Length/X     | N2 | Alpha/Y      | N3 | Beta/Z       | J |
| 1                                | 1    | C    |    |              |    |              |    |              |   |
| 2                                | 2    | C    | 1  | 1.495062( 1) |    |              |    |              |   |
| 3                                | 3    | O    | 1  | 1.354068( 2) | 2  | 110.185( 9)  |    |              |   |
| 4                                | 4    | O    | 1  | 1.213258( 3) | 2  | 127.720( 10) | 3  | 180.000( 16) | 0 |
| 5                                | 5    | O    | 3  | 1.439858( 4) | 1  | 110.252( 11) | 2  | 180.000( 17) | 0 |
| 6                                | 6    | H    | 5  | 0.985046( 5) | 3  | 99.642( 12)  | 1  | 0.000( 18)   | 0 |
| 7                                | 7    | H    | 2  | 1.084326( 6) | 1  | 108.733( 13) | 3  | 180.000( 19) | 0 |

8 8 H 2 1.087676( 7) 1 109.767( 14) 7 120.612( 20) 0  
9 9 H 2 1.087676( 8) 1 109.767( 15) 7 -120.612( 21) 0

-----  
-304.21140476 Energy CCSD(T)-F12/CVTA-F12  
=====

=====

Geometry (MP2/AVTZ) 4

-----  
Z-MATRIX (ANGSTROMS AND DEGREES)  
CD Cent Atom N1 Length/X N2 Alpha/Y N3 Beta/Z J  
-----  
1 1 C  
2 2 C 1 1.498510( 1)  
3 3 O 1 1.365697( 2) 2 109.137( 9)  
4 4 O 1 1.206128( 3) 2 127.240( 10) 3 184.670( 16) 0  
5 5 O 3 1.438563( 4) 1 110.837( 11) 2 180.000( 17) 0  
6 6 H 5 0.973957( 5) 3 101.553( 12) 1 45.000( 18) 0  
7 7 H 2 1.085096( 6) 1 111.732( 13) 3 0.000( 19) 0  
8 8 H 2 1.087298( 7) 1 108.019( 14) 7 121.360( 20) 0  
9 9 H 2 1.087754( 8) 1 108.630( 15) 7 -121.500( 21) 0  
-----

-----  
-304.20708371 Energy CCSD(T)-F12/CVTA-F12  
=====

=====

Geometry (MP2/AVTZ) 5

-----  
Z-MATRIX (ANGSTROMS AND DEGREES)  
CD Cent Atom N1 Length/X N2 Alpha/Y N3 Beta/Z J  
-----  
1 1 C  
2 2 C 1 1.498338( 1)  
3 3 O 1 1.365951( 2) 2 108.934( 9)  
4 4 O 1 1.206243( 3) 2 127.429( 10) 3 185.451( 16) 0  
5 5 O 3 1.438463( 4) 1 110.872( 11) 2 180.000( 17) 0  
6 6 H 5 0.974059( 5) 3 101.583( 12) 1 45.000( 18) 0  
7 7 H 2 1.088824( 6) 1 108.102( 13) 3 90.000( 19) 0  
8 8 H 2 1.085406( 7) 1 108.705( 14) 7 118.001( 20) 0  
9 9 H 2 1.085754( 8) 1 111.492( 15) 7 -119.538( 21) 0  
-----

-----  
-304.20713105 Energy CCSD(T)-F12/CVTA-F12  
=====

=====

Geometry (MP2/AVTZ) 6

-----  
Z-MATRIX (ANGSTROMS AND DEGREES)  
CD Cent Atom N1 Length/X N2 Alpha/Y N3 Beta/Z J  
-----  
1 1 C  
2 2 C 1 1.499043( 1)  
3 3 O 1 1.366535( 2) 2 108.724( 9)  
4 4 O 1 1.206250( 3) 2 127.722( 10) 3 185.048( 16) 0  
5 5 O 3 1.438544( 4) 1 110.945( 11) 2 180.000( 17) 0  
6 6 H 5 0.973889( 5) 3 101.550( 12) 1 45.000( 18) 0  
7 7 H 2 1.084372( 6) 1 108.586( 13) 3 180.000( 19) 0  
8 8 H 2 1.087477( 7) 1 110.508( 14) 7 121.248( 20) 0  
9 9 H 2 1.087894( 8) 1 109.246( 15) 7 -119.902( 21) 0  
-----

-304.20687240 Energy CCSD(T)-F12/CVTA-F12

=====  
Geometry (MP2/AVTZ) 7

Z-MATRIX (ANGSTROMS AND DEGREES)

| CD | Cent | Atom | N1 | Length/X     | N2 | Alpha/Y      | N3 | Beta/Z        | J |
|----|------|------|----|--------------|----|--------------|----|---------------|---|
| 1  | 1    | C    |    |              |    |              |    |               |   |
| 2  | 2    | C    | 1  | 1.499027( 1) |    |              |    |               |   |
| 3  | 3    | O    | 1  | 1.366567( 2) | 2  | 108.905( 9)  |    |               |   |
| 4  | 4    | O    | 1  | 1.206101( 3) | 2  | 127.559( 10) | 3  | 184.166( 16)  | 0 |
| 5  | 5    | O    | 3  | 1.438759( 4) | 1  | 110.927( 11) | 2  | 180.000( 17)  | 0 |
| 6  | 6    | H    | 5  | 0.973838( 5) | 3  | 101.501( 12) | 1  | 45.000( 18)   | 0 |
| 7  | 7    | H    | 2  | 1.089082( 6) | 1  | 109.027( 13) | 3  | 270.000( 19)  | 0 |
| 8  | 8    | H    | 2  | 1.085828( 7) | 1  | 110.915( 14) | 7  | 119.389( 20)  | 0 |
| 9  | 9    | H    | 2  | 1.084970( 8) | 1  | 108.444( 15) | 7  | -118.555( 21) | 0 |

-304.20683863 Energy CCSD(T)-F12/CVTA-F12

=====  
Geometry (MP2/AVTZ) 8

Z-MATRIX (ANGSTROMS AND DEGREES)

| CD | Cent | Atom | N1 | Length/X     | N2 | Alpha/Y      | N3 | Beta/Z        | J |
|----|------|------|----|--------------|----|--------------|----|---------------|---|
| 1  | 1    | C    |    |              |    |              |    |               |   |
| 2  | 2    | C    | 1  | 1.502053( 1) |    |              |    |               |   |
| 3  | 3    | O    | 1  | 1.379195( 2) | 2  | 107.837( 9)  |    |               |   |
| 4  | 4    | O    | 1  | 1.199366( 3) | 2  | 127.260( 10) | 3  | 182.102( 16)  | 0 |
| 5  | 5    | O    | 3  | 1.440552( 4) | 1  | 110.635( 11) | 2  | 180.000( 17)  | 0 |
| 6  | 6    | H    | 5  | 0.969210( 5) | 3  | 100.618( 12) | 1  | 90.000( 18)   | 0 |
| 7  | 7    | H    | 2  | 1.085068( 6) | 1  | 112.039( 13) | 3  | 0.000( 19)    | 0 |
| 8  | 8    | H    | 2  | 1.087508( 7) | 1  | 107.988( 14) | 7  | 121.423( 20)  | 0 |
| 9  | 9    | H    | 2  | 1.087600( 8) | 1  | 108.442( 15) | 7  | -121.608( 21) | 0 |

-304.20401907 Energy CCSD(T)-F12/CVTA-F12

=====  
Geometry (MP2/AVTZ) 9

Z-MATRIX (ANGSTROMS AND DEGREES)

| CD | Cent | Atom | N1 | Length/X     | N2 | Alpha/Y      | N3 | Beta/Z        | J |
|----|------|------|----|--------------|----|--------------|----|---------------|---|
| 1  | 1    | C    |    |              |    |              |    |               |   |
| 2  | 2    | C    | 1  | 1.501614( 1) |    |              |    |               |   |
| 3  | 3    | O    | 1  | 1.379637( 2) | 2  | 107.587( 9)  |    |               |   |
| 4  | 4    | O    | 1  | 1.199631( 3) | 2  | 127.552( 10) | 3  | 182.873( 16)  | 0 |
| 5  | 5    | O    | 3  | 1.440140( 4) | 1  | 110.718( 11) | 2  | 180.000( 17)  | 0 |
| 6  | 6    | H    | 5  | 0.969338( 5) | 3  | 100.800( 12) | 1  | 90.000( 18)   | 0 |
| 7  | 7    | H    | 2  | 1.089015( 6) | 1  | 108.255( 13) | 3  | 90.000( 19)   | 0 |
| 8  | 8    | H    | 2  | 1.085266( 7) | 1  | 108.613( 14) | 7  | 118.022( 20)  | 0 |
| 9  | 9    | H    | 2  | 1.085814( 8) | 1  | 111.553( 15) | 7  | -119.521( 21) | 0 |

-304.20409026 Energy CCSD(T)-F12/CVTA-F12

=====

Geometry (MP2/AVTZ) 10

-----  
Z-MATRIX (ANGSTROMS AND DEGREES)  
-----

| CD | Cent | Atom | N1 | Length/X     | N2 | Alpha/Y      | N3 | Beta/Z        | J |
|----|------|------|----|--------------|----|--------------|----|---------------|---|
| 1  | 1    | C    |    |              |    |              |    |               |   |
| 2  | 2    | C    | 1  | 1.502079( 1) |    |              |    |               |   |
| 3  | 3    | O    | 1  | 1.380054( 2) | 2  | 107.354( 9)  |    |               |   |
| 4  | 4    | O    | 1  | 1.199676( 3) | 2  | 127.856( 10) | 3  | 182.271( 16)  | 0 |
| 5  | 5    | O    | 3  | 1.440020( 4) | 1  | 110.776( 11) | 2  | 180.000( 17)  | 0 |
| 6  | 6    | H    | 5  | 0.969229( 5) | 3  | 100.690( 12) | 1  | 90.000( 18)   | 0 |
| 7  | 7    | H    | 2  | 1.084417( 6) | 1  | 108.499( 13) | 3  | 180.000( 19)  | 0 |
| 8  | 8    | H    | 2  | 1.087590( 7) | 1  | 110.307( 14) | 7  | 120.948( 20)  | 0 |
| 9  | 9    | H    | 2  | 1.087882( 8) | 1  | 109.641( 15) | 7  | -120.150( 21) | 0 |

-----

-304.20394275 Energy CCSD(T)-F12/CVTA-F12

=====  
Geometry (MP2/AVTZ) 11

-----  
Z-MATRIX (ANGSTROMS AND DEGREES)  
-----

| CD | Cent | Atom | N1 | Length/X     | N2 | Alpha/Y      | N3 | Beta/Z        | J |
|----|------|------|----|--------------|----|--------------|----|---------------|---|
| 1  | 1    | C    |    |              |    |              |    |               |   |
| 2  | 2    | C    | 1  | 1.502063( 1) |    |              |    |               |   |
| 3  | 3    | O    | 1  | 1.379814( 2) | 2  | 107.614( 9)  |    |               |   |
| 4  | 4    | O    | 1  | 1.199605( 3) | 2  | 127.572( 10) | 3  | 181.383( 16)  | 0 |
| 5  | 5    | O    | 3  | 1.440596( 4) | 1  | 110.734( 11) | 2  | 180.000( 17)  | 0 |
| 6  | 6    | H    | 5  | 0.969195( 5) | 3  | 100.552( 12) | 1  | 90.000( 18)   | 0 |
| 7  | 7    | H    | 2  | 1.089127( 6) | 1  | 108.745( 13) | 3  | 270.000( 19)  | 0 |
| 8  | 8    | H    | 2  | 1.085765( 7) | 1  | 111.357( 14) | 7  | 119.504( 20)  | 0 |
| 9  | 9    | H    | 2  | 1.085091( 8) | 1  | 108.372( 15) | 7  | -118.208( 21) | 0 |

-----

-304.20388912 Energy CCSD(T)-F12/CVTA-F12

=====  
Geometry (MP2/AVTZ) 12

-----  
Z-MATRIX (ANGSTROMS AND DEGREES)  
-----

| CD | Cent | Atom | N1 | Length/X     | N2 | Alpha/Y      | N3 | Beta/Z        | J |
|----|------|------|----|--------------|----|--------------|----|---------------|---|
| 1  | 1    | C    |    |              |    |              |    |               |   |
| 2  | 2    | C    | 1  | 1.502822( 1) |    |              |    |               |   |
| 3  | 3    | O    | 1  | 1.376329( 2) | 2  | 107.719( 9)  |    |               |   |
| 4  | 4    | O    | 1  | 1.198602( 3) | 2  | 127.237( 10) | 3  | 179.947( 16)  | 0 |
| 5  | 5    | O    | 3  | 1.448983( 4) | 1  | 109.369( 11) | 2  | 180.000( 17)  | 0 |
| 6  | 6    | H    | 5  | 0.968512( 5) | 3  | 98.134( 12)  | 1  | 135.000( 18)  | 0 |
| 7  | 7    | H    | 2  | 1.085134( 6) | 1  | 112.159( 13) | 3  | 0.000( 19)    | 0 |
| 8  | 8    | H    | 2  | 1.087598( 7) | 1  | 108.035( 14) | 7  | 121.439( 20)  | 0 |
| 9  | 9    | H    | 2  | 1.087492( 8) | 1  | 108.342( 15) | 7  | -121.604( 21) | 0 |

-----

-304.20324815 Energy CCSD(T)-F12/CVTA-F12

=====  
Geometry (MP2/AVTZ) 13

-----  
Z-MATRIX (ANGSTROMS AND DEGREES)  
-----

| CD | Cent | Atom | N1 | Length/X     | N2 | Alpha/Y      | N3 | Beta/Z        | J |
|----|------|------|----|--------------|----|--------------|----|---------------|---|
| 1  | 1    | C    |    |              |    |              |    |               |   |
| 2  | 2    | C    | 1  | 1.502733( 1) |    |              |    |               |   |
| 3  | 3    | O    | 1  | 1.376098( 2) | 2  | 107.477( 9)  |    |               |   |
| 4  | 4    | O    | 1  | 1.198936( 3) | 2  | 127.514( 10) | 3  | 180.653( 16)  | 0 |
| 5  | 5    | O    | 3  | 1.448311( 4) | 1  | 109.437( 11) | 2  | 180.000( 17)  | 0 |
| 6  | 6    | H    | 5  | 0.968477( 5) | 3  | 98.220( 12)  | 1  | 135.000( 18)  | 0 |
| 7  | 7    | H    | 2  | 1.089068( 6) | 1  | 108.399( 13) | 3  | 90.000( 19)   | 0 |
| 8  | 8    | H    | 2  | 1.085236( 7) | 1  | 108.466( 14) | 7  | 118.046( 20)  | 0 |
| 9  | 9    | H    | 2  | 1.085792( 8) | 1  | 111.604( 15) | 7  | -119.644( 21) | 0 |

-304.20323212 Energy CCSD(T)-F12/CVTA-F12

=====  
=====

Geometry (MP2/AVTZ) 14

Z-MATRIX (ANGSTROMS AND DEGREES)

| CD | Cent | Atom | N1 | Length/X     | N2 | Alpha/Y      | N3 | Beta/Z        | J |
|----|------|------|----|--------------|----|--------------|----|---------------|---|
| 1  | 1    | C    |    |              |    |              |    |               |   |
| 2  | 2    | C    | 1  | 1.503221( 1) |    |              |    |               |   |
| 3  | 3    | O    | 1  | 1.376479( 2) | 2  | 107.251( 9)  |    |               |   |
| 4  | 4    | O    | 1  | 1.198946( 3) | 2  | 127.802( 10) | 3  | 179.914( 16)  | 0 |
| 5  | 5    | O    | 3  | 1.448353( 4) | 1  | 109.473( 11) | 2  | 180.000( 17)  | 0 |
| 6  | 6    | H    | 5  | 0.968427( 5) | 3  | 98.131( 12)  | 1  | 135.000( 18)  | 0 |
| 7  | 7    | H    | 2  | 1.084526( 6) | 1  | 108.298( 13) | 3  | 180.000( 19)  | 0 |
| 8  | 8    | H    | 2  | 1.087674( 7) | 1  | 110.118( 14) | 7  | 120.421( 20)  | 0 |
| 9  | 9    | H    | 2  | 1.087695( 8) | 1  | 110.057( 15) | 7  | -120.382( 21) | 0 |

-304.20313172 Energy CCSD(T)-F12/CVTA-F12

=====  
=====

Geometry (MP2/AVTZ) 15

Z-MATRIX (ANGSTROMS AND DEGREES)

| CD | Cent | Atom | N1 | Length/X     | N2 | Alpha/Y      | N3 | Beta/Z        | J |
|----|------|------|----|--------------|----|--------------|----|---------------|---|
| 1  | 1    | C    |    |              |    |              |    |               |   |
| 2  | 2    | C    | 1  | 1.502733( 1) |    |              |    |               |   |
| 3  | 3    | O    | 1  | 1.376544( 2) | 2  | 107.489( 9)  |    |               |   |
| 4  | 4    | O    | 1  | 1.198809( 3) | 2  | 127.556( 10) | 3  | 179.203( 16)  | 0 |
| 5  | 5    | O    | 3  | 1.448585( 4) | 1  | 109.338( 11) | 2  | 180.000( 17)  | 0 |
| 6  | 6    | H    | 5  | 0.968467( 5) | 3  | 98.024( 12)  | 1  | 135.000( 18)  | 0 |
| 7  | 7    | H    | 2  | 1.088977( 6) | 1  | 108.657( 13) | 3  | 270.000( 19)  | 0 |
| 8  | 8    | H    | 2  | 1.085863( 7) | 1  | 111.567( 14) | 7  | 119.674( 20)  | 0 |
| 9  | 9    | H    | 2  | 1.085183( 8) | 1  | 108.289( 15) | 7  | -118.102( 21) | 0 |

-304.20316794 Energy CCSD(T)-F12/CVTA-F12

=====  
=====

Geometry (MP2/AVTZ) 16

Z-MATRIX (ANGSTROMS AND DEGREES)

| CD | Cent | Atom | N1 | Length/X | N2 | Alpha/Y | N3 | Beta/Z | J |
|----|------|------|----|----------|----|---------|----|--------|---|
| 1  | 1    | C    |    |          |    |         |    |        |   |

```

2  2 C   1  1.502494(  1)
3  3 O   1  1.370701(  2)  2 108.015(  9)
4  4 O   1  1.199486(  3)  2 127.307( 10)  3 180.000( 16)  0
5  5 O   3  1.454177(  4)  1 108.215( 11)  2 180.000( 17)  0
6  6 H   5  0.969132(  5)  3  96.851( 12)  1 180.000( 18)  0
7  7 H   2  1.085217(  6)  1 112.179( 13)  3  0.000( 19)  0
8  8 H   2  1.087527(  7)  1 108.196( 14)  7 121.502( 20)  0
9  9 H   2  1.087527(  8)  1 108.196( 15)  7 -121.502( 21)  0

```

-----  
-304.20324259 Energy CCSD(T)-F12/CVTA-F12  
=====

=====  
Geometry (MP2/AVTZ) 17  
-----

Z-MATRIX (ANGSTROMS AND DEGREES)

| CD | Cent | Atom | N1 | Length/X     | N2 | Alpha/Y      | N3 | Beta/Z        | J |
|----|------|------|----|--------------|----|--------------|----|---------------|---|
| 1  | 1    | C    |    |              |    |              |    |               |   |
| 2  | 2    | C    | 1  | 1.502619( 1) |    |              |    |               |   |
| 3  | 3    | O    | 1  | 1.370539( 2) | 2  | 107.807( 9)  |    |               |   |
| 4  | 4    | O    | 1  | 1.199793( 3) | 2  | 127.571( 10) | 3  | 180.682( 16)  | 0 |
| 5  | 5    | O    | 3  | 1.453718( 4) | 1  | 108.265( 11) | 2  | 180.000( 17)  | 0 |
| 6  | 6    | H    | 5  | 0.969063( 5) | 3  | 96.841( 12)  | 1  | 180.000( 18)  | 0 |
| 7  | 7    | H    | 2  | 1.088975( 6) | 1  | 108.575( 13) | 3  | 90.000( 19)   | 0 |
| 8  | 8    | H    | 2  | 1.085262( 7) | 1  | 108.310( 14) | 7  | 118.059( 20)  | 0 |
| 9  | 9    | H    | 2  | 1.085850( 8) | 1  | 111.630( 15) | 7  | -119.778( 21) | 0 |

-----  
-304.20317313 Energy CCSD(T)-F12/CVTA-F12  
=====

=====  
Geometry (MP2/AVTZ) 18  
-----

Z-MATRIX (ANGSTROMS AND DEGREES)

| CD | Cent | Atom | N1 | Length/X     | N2 | Alpha/Y      | N3 | Beta/Z        | J |
|----|------|------|----|--------------|----|--------------|----|---------------|---|
| 1  | 1    | C    |    |              |    |              |    |               |   |
| 2  | 2    | C    | 1  | 1.503036( 1) |    |              |    |               |   |
| 3  | 3    | O    | 1  | 1.370922( 2) | 2  | 107.580( 9)  |    |               |   |
| 4  | 4    | O    | 1  | 1.199829( 3) | 2  | 127.858( 10) | 3  | 180.000( 16)  | 0 |
| 5  | 5    | O    | 3  | 1.453777( 4) | 1  | 108.299( 11) | 2  | 180.000( 17)  | 0 |
| 6  | 6    | H    | 5  | 0.969048( 5) | 3  | 96.833( 12)  | 1  | 180.000( 18)  | 0 |
| 7  | 7    | H    | 2  | 1.084511( 6) | 1  | 108.239( 13) | 3  | 180.000( 19)  | 0 |
| 8  | 8    | H    | 2  | 1.087697( 7) | 1  | 110.126( 14) | 7  | 120.343( 20)  | 0 |
| 9  | 9    | H    | 2  | 1.087697( 8) | 1  | 110.126( 15) | 7  | -120.343( 21) | 0 |

-----  
-304.20307657 Energy CCSD(T)-F12/CVTA-F12  
=====

=====  
Geometry (MP2/AVTZ) 19  
-----

Z-MATRIX (ANGSTROMS AND DEGREES)

| CD | Cent | Atom | N1 | Length/X     | N2 | Alpha/Y      | N3 | Beta/Z       | J |
|----|------|------|----|--------------|----|--------------|----|--------------|---|
| 1  | 1    | C    |    |              |    |              |    |              |   |
| 2  | 2    | C    | 1  | 1.502822( 1) |    |              |    |              |   |
| 3  | 3    | O    | 1  | 1.376329( 2) | 2  | 107.719( 9)  |    |              |   |
| 4  | 4    | O    | 1  | 1.198602( 3) | 2  | 127.237( 10) | 3  | 180.053( 16) | 0 |

|   |   |   |   |              |   |              |   |               |   |
|---|---|---|---|--------------|---|--------------|---|---------------|---|
| 5 | 5 | O | 3 | 1.448983( 4) | 1 | 109.369( 11) | 2 | 180.000( 17)  | 0 |
| 6 | 6 | H | 5 | 0.968512( 5) | 3 | 98.134( 12)  | 1 | 225.000( 18)  | 0 |
| 7 | 7 | H | 2 | 1.085134( 6) | 1 | 112.159( 13) | 3 | 0.000( 19)    | 0 |
| 8 | 8 | H | 2 | 1.087492( 7) | 1 | 108.342( 14) | 7 | 121.604( 20)  | 0 |
| 9 | 9 | H | 2 | 1.087598( 8) | 1 | 108.035( 15) | 7 | -121.439( 21) | 0 |

-304.20324815 Energy CCSD(T)-F12/CVTA-F12

=====  
 Geometry (MP2/AVTZ) 20

Z-MATRIX (ANGSTROMS AND DEGREES)

| CD | Cent | Atom | N1 | Length/X     | N2 | Alpha/Y      | N3 | Beta/Z        | J |
|----|------|------|----|--------------|----|--------------|----|---------------|---|
| 1  | 1    | C    |    |              |    |              |    |               |   |
| 2  | 2    | C    | 1  | 1.502733( 1) |    |              |    |               |   |
| 3  | 3    | O    | 1  | 1.376544( 2) | 2  | 107.489( 9)  |    |               |   |
| 4  | 4    | O    | 1  | 1.198809( 3) | 2  | 127.556( 10) | 3  | 180.797( 16)  | 0 |
| 5  | 5    | O    | 3  | 1.448585( 4) | 1  | 109.338( 11) | 2  | 180.000( 17)  | 0 |
| 6  | 6    | H    | 5  | 0.968467( 5) | 3  | 98.024( 12)  | 1  | 225.000( 18)  | 0 |
| 7  | 7    | H    | 2  | 1.088977( 6) | 1  | 108.657( 13) | 3  | 90.000( 19)   | 0 |
| 8  | 8    | H    | 2  | 1.085183( 7) | 1  | 108.289( 14) | 7  | 118.102( 20)  | 0 |
| 9  | 9    | H    | 2  | 1.085863( 8) | 1  | 111.567( 15) | 7  | -119.674( 21) | 0 |

-304.20316794 Energy CCSD(T)-F12/CVTA-F12

=====  
 Geometry (MP2/AVTZ) 21

Z-MATRIX (ANGSTROMS AND DEGREES)

| CD | Cent | Atom | N1 | Length/X     | N2 | Alpha/Y      | N3 | Beta/Z        | J |
|----|------|------|----|--------------|----|--------------|----|---------------|---|
| 1  | 1    | C    |    |              |    |              |    |               |   |
| 2  | 2    | C    | 1  | 1.503221( 1) |    |              |    |               |   |
| 3  | 3    | O    | 1  | 1.376479( 2) | 2  | 107.251( 9)  |    |               |   |
| 4  | 4    | O    | 1  | 1.198946( 3) | 2  | 127.802( 10) | 3  | 180.086( 16)  | 0 |
| 5  | 5    | O    | 3  | 1.448353( 4) | 1  | 109.473( 11) | 2  | 180.000( 17)  | 0 |
| 6  | 6    | H    | 5  | 0.968427( 5) | 3  | 98.131( 12)  | 1  | 225.000( 18)  | 0 |
| 7  | 7    | H    | 2  | 1.084526( 6) | 1  | 108.298( 13) | 3  | 180.000( 19)  | 0 |
| 8  | 8    | H    | 2  | 1.087694( 7) | 1  | 110.057( 14) | 7  | 120.382( 20)  | 0 |
| 9  | 9    | H    | 2  | 1.087674( 8) | 1  | 110.118( 15) | 7  | -120.421( 21) | 0 |

-304.20313172 Energy CCSD(T)-F12/CVTA-F12

=====  
 Geometry (MP2/AVTZ) 22

Z-MATRIX (ANGSTROMS AND DEGREES)

| CD | Cent | Atom | N1 | Length/X     | N2 | Alpha/Y      | N3 | Beta/Z       | J |
|----|------|------|----|--------------|----|--------------|----|--------------|---|
| 1  | 1    | C    |    |              |    |              |    |              |   |
| 2  | 2    | C    | 1  | 1.502733( 1) |    |              |    |              |   |
| 3  | 3    | O    | 1  | 1.376098( 2) | 2  | 107.477( 9)  |    |              |   |
| 4  | 4    | O    | 1  | 1.198936( 3) | 2  | 127.514( 10) | 3  | 179.347( 16) | 0 |
| 5  | 5    | O    | 3  | 1.448311( 4) | 1  | 109.437( 11) | 2  | 180.000( 17) | 0 |
| 6  | 6    | H    | 5  | 0.968477( 5) | 3  | 98.220( 12)  | 1  | 225.000( 18) | 0 |
| 7  | 7    | H    | 2  | 1.089068( 6) | 1  | 108.399( 13) | 3  | 270.000( 19) | 0 |

8 8 H 2 1.085792( 7) 1 111.604( 14) 7 119.644( 20) 0  
9 9 H 2 1.085236( 8) 1 108.466( 15) 7 -118.046( 21) 0

-----  
-304.20323212 Energy CCSD(T)-F12/CVTA-F12  
=====

=====  
Geometry (MP2/AVTZ) 23  
-----

Z-MATRIX (ANGSTROMS AND DEGREES)  
CD Cent Atom N1 Length/X N2 Alpha/Y N3 Beta/Z J  
-----  
1 1 C  
2 2 C 1 1.502053( 1)  
3 3 O 1 1.379195( 2) 2 107.837( 9)  
4 4 O 1 1.199366( 3) 2 127.260( 10) 3 177.898( 16) 0  
5 5 O 3 1.440552( 4) 1 110.635( 11) 2 180.000( 17) 0  
6 6 H 5 0.969210( 5) 3 100.618( 12) 1 270.000( 18) 0  
7 7 H 2 1.085068( 6) 1 112.039( 13) 3 0.000( 19) 0  
8 8 H 2 1.087600( 7) 1 108.442( 14) 7 121.608( 20) 0  
9 9 H 2 1.087508( 8) 1 107.988( 15) 7 -121.423( 21) 0  
-----

-----  
-304.20401907 Energy CCSD(T)-F12/CVTA-F12  
=====

=====  
Geometry (MP2/AVTZ) 24  
-----

Z-MATRIX (ANGSTROMS AND DEGREES)  
CD Cent Atom N1 Length/X N2 Alpha/Y N3 Beta/Z J  
-----  
1 1 C  
2 2 C 1 1.502063( 1)  
3 3 O 1 1.379814( 2) 2 107.614( 9)  
4 4 O 1 1.199605( 3) 2 127.572( 10) 3 178.617( 16) 0  
5 5 O 3 1.440596( 4) 1 110.734( 11) 2 180.000( 17) 0  
6 6 H 5 0.969195( 5) 3 100.552( 12) 1 270.000( 18) 0  
7 7 H 2 1.089127( 6) 1 108.745( 13) 3 90.000( 19) 0  
8 8 H 2 1.085091( 7) 1 108.372( 14) 7 118.208( 20) 0  
9 9 H 2 1.085765( 8) 1 111.357( 15) 7 -119.504( 21) 0  
-----

-----  
-304.20388912 Energy CCSD(T)-F12/CVTA-F12  
=====

=====  
Geometry (MP2/AVTZ) 25  
-----

Z-MATRIX (ANGSTROMS AND DEGREES)  
CD Cent Atom N1 Length/X N2 Alpha/Y N3 Beta/Z J  
-----  
1 1 C  
2 2 C 1 1.502079( 1)  
3 3 O 1 1.380054( 2) 2 107.354( 9)  
4 4 O 1 1.199676( 3) 2 127.856( 10) 3 177.729( 16) 0  
5 5 O 3 1.440020( 4) 1 110.776( 11) 2 180.000( 17) 0  
6 6 H 5 0.969229( 5) 3 100.690( 12) 1 270.000( 18) 0  
7 7 H 2 1.084417( 6) 1 108.499( 13) 3 180.000( 19) 0  
8 8 H 2 1.087882( 7) 1 109.641( 14) 7 120.150( 20) 0  
9 9 H 2 1.087590( 8) 1 110.307( 15) 7 -120.948( 21) 0  
-----



-304.20394275 Energy CCSD(T)-F12/CVTA-F12

=====  
Geometry (MP2/AVTZ) 26

Z-MATRIX (ANGSTROMS AND DEGREES)

| CD | Cent | Atom | N1 | Length/X     | N2 | Alpha/Y      | N3 | Beta/Z        | J |
|----|------|------|----|--------------|----|--------------|----|---------------|---|
| 1  | 1    | C    |    |              |    |              |    |               |   |
| 2  | 2    | C    | 1  | 1.501614( 1) |    |              |    |               |   |
| 3  | 3    | O    | 1  | 1.379637( 2) | 2  | 107.587( 9)  |    |               |   |
| 4  | 4    | O    | 1  | 1.199631( 3) | 2  | 127.552( 10) | 3  | 177.127( 16)  | 0 |
| 5  | 5    | O    | 3  | 1.440140( 4) | 1  | 110.718( 11) | 2  | 180.000( 17)  | 0 |
| 6  | 6    | H    | 5  | 0.969338( 5) | 3  | 100.800( 12) | 1  | 270.000( 18)  | 0 |
| 7  | 7    | H    | 2  | 1.089015( 6) | 1  | 108.255( 13) | 3  | 270.000( 19)  | 0 |
| 8  | 8    | H    | 2  | 1.085814( 7) | 1  | 111.553( 14) | 7  | 119.521( 20)  | 0 |
| 9  | 9    | H    | 2  | 1.085266( 8) | 1  | 108.613( 15) | 7  | -118.022( 21) | 0 |

-304.20409025 Energy CCSD(T)-F12/CVTA-F12

=====  
Geometry (MP2/AVTZ) 27

Z-MATRIX (ANGSTROMS AND DEGREES)

| CD | Cent | Atom | N1 | Length/X     | N2 | Alpha/Y      | N3 | Beta/Z        | J |
|----|------|------|----|--------------|----|--------------|----|---------------|---|
| 1  | 1    | C    |    |              |    |              |    |               |   |
| 2  | 2    | C    | 1  | 1.498510( 1) |    |              |    |               |   |
| 3  | 3    | O    | 1  | 1.365697( 2) | 2  | 109.137( 9)  |    |               |   |
| 4  | 4    | O    | 1  | 1.206128( 3) | 2  | 127.240( 10) | 3  | 175.330( 16)  | 0 |
| 5  | 5    | O    | 3  | 1.438563( 4) | 1  | 110.837( 11) | 2  | 180.000( 17)  | 0 |
| 6  | 6    | H    | 5  | 0.973957( 5) | 3  | 101.553( 12) | 1  | 315.000( 18)  | 0 |
| 7  | 7    | H    | 2  | 1.085096( 6) | 1  | 111.732( 13) | 3  | 0.000( 19)    | 0 |
| 8  | 8    | H    | 2  | 1.087754( 7) | 1  | 108.630( 14) | 7  | 121.500( 20)  | 0 |
| 9  | 9    | H    | 2  | 1.087298( 8) | 1  | 108.019( 15) | 7  | -121.360( 21) | 0 |

-304.20708371 Energy CCSD(T)-F12/CVTA-F12

=====  
Geometry (MP2/AVTZ) 28

Z-MATRIX (ANGSTROMS AND DEGREES)

| CD | Cent | Atom | N1 | Length/X     | N2 | Alpha/Y      | N3 | Beta/Z        | J |
|----|------|------|----|--------------|----|--------------|----|---------------|---|
| 1  | 1    | C    |    |              |    |              |    |               |   |
| 2  | 2    | C    | 1  | 1.499027( 1) |    |              |    |               |   |
| 3  | 3    | O    | 1  | 1.366567( 2) | 2  | 108.905( 9)  |    |               |   |
| 4  | 4    | O    | 1  | 1.206101( 3) | 2  | 127.559( 10) | 3  | 175.834( 16)  | 0 |
| 5  | 5    | O    | 3  | 1.438759( 4) | 1  | 110.927( 11) | 2  | 180.000( 17)  | 0 |
| 6  | 6    | H    | 5  | 0.973838( 5) | 3  | 101.501( 12) | 1  | 315.000( 18)  | 0 |
| 7  | 7    | H    | 2  | 1.089082( 6) | 1  | 109.027( 13) | 3  | 90.000( 19)   | 0 |
| 8  | 8    | H    | 2  | 1.084970( 7) | 1  | 108.444( 14) | 7  | 118.555( 20)  | 0 |
| 9  | 9    | H    | 2  | 1.085828( 8) | 1  | 110.915( 15) | 7  | -119.389( 21) | 0 |

-304.20683863 Energy CCSD(T)-F12/CVTA-F12

=====  
=====

Geometry (MP2/AVTZ) 29

-----

Z-MATRIX (ANGSTROMS AND DEGREES)

| CD | Cent | Atom | N1 | Length/X     | N2 | Alpha/Y      | N3 | Beta/Z        | J |
|----|------|------|----|--------------|----|--------------|----|---------------|---|
| 1  | 1    | C    |    |              |    |              |    |               |   |
| 2  | 2    | C    | 1  | 1.499043( 1) |    |              |    |               |   |
| 3  | 3    | O    | 1  | 1.366535( 2) | 2  | 108.724( 9)  |    |               |   |
| 4  | 4    | O    | 1  | 1.206250( 3) | 2  | 127.722( 10) | 3  | 174.952( 16)  | 0 |
| 5  | 5    | O    | 3  | 1.438544( 4) | 1  | 110.945( 11) | 2  | 180.000( 17)  | 0 |
| 6  | 6    | H    | 5  | 0.973889( 5) | 3  | 101.550( 12) | 1  | 315.000( 18)  | 0 |
| 7  | 7    | H    | 2  | 1.084372( 6) | 1  | 108.586( 13) | 3  | 180.000( 19)  | 0 |
| 8  | 8    | H    | 2  | 1.087894( 7) | 1  | 109.246( 14) | 7  | 119.902( 20)  | 0 |
| 9  | 9    | H    | 2  | 1.087477( 8) | 1  | 110.508( 15) | 7  | -121.248( 21) | 0 |

-----

-304.20687240 Energy CCSD(T)-F12/CVTA-F12

=====  
 Geometry (MP2/AVTZ) 30

-----

Z-MATRIX (ANGSTROMS AND DEGREES)

| CD | Cent | Atom | N1 | Length/X     | N2 | Alpha/Y      | N3 | Beta/Z        | J |
|----|------|------|----|--------------|----|--------------|----|---------------|---|
| 1  | 1    | C    |    |              |    |              |    |               |   |
| 2  | 2    | C    | 1  | 1.498338( 1) |    |              |    |               |   |
| 3  | 3    | O    | 1  | 1.365951( 2) | 2  | 108.934( 9)  |    |               |   |
| 4  | 4    | O    | 1  | 1.206243( 3) | 2  | 127.429( 10) | 3  | 174.549( 16)  | 0 |
| 5  | 5    | O    | 3  | 1.438463( 4) | 1  | 110.872( 11) | 2  | 180.000( 17)  | 0 |
| 6  | 6    | H    | 5  | 0.974059( 5) | 3  | 101.583( 12) | 1  | 315.000( 18)  | 0 |
| 7  | 7    | H    | 2  | 1.088824( 6) | 1  | 108.102( 13) | 3  | 270.000( 19)  | 0 |
| 8  | 8    | H    | 2  | 1.085754( 7) | 1  | 111.492( 14) | 7  | 119.538( 20)  | 0 |
| 9  | 9    | H    | 2  | 1.085406( 8) | 1  | 108.705( 15) | 7  | -118.001( 21) | 0 |

-----

-304.20713105 Energy CCSD(T)-F12/CVTA-F12

=====  
 Geometry (MP2/AVTZ) 31

-----

Z-MATRIX (ANGSTROMS AND DEGREES)

| CD | Cent | Atom | N1 | Length/X     | N2 | Alpha/Y      | N3 | Beta/Z        | J |
|----|------|------|----|--------------|----|--------------|----|---------------|---|
| 1  | 1    | C    |    |              |    |              |    |               |   |
| 2  | 2    | C    | 1  | 1.502565( 1) |    |              |    |               |   |
| 3  | 3    | O    | 1  | 1.372908( 2) | 2  | 111.383( 9)  |    |               |   |
| 4  | 4    | O    | 1  | 1.208984( 3) | 2  | 125.142( 10) | 3  | 166.151( 16)  | 0 |
| 5  | 5    | O    | 3  | 1.449600( 4) | 1  | 110.548( 11) | 2  | 135.000( 17)  | 0 |
| 6  | 6    | H    | 5  | 0.976867( 5) | 3  | 101.317( 12) | 1  | 0.000( 18)    | 0 |
| 7  | 7    | H    | 2  | 1.083865( 6) | 1  | 111.712( 13) | 3  | 0.000( 19)    | 0 |
| 8  | 8    | H    | 2  | 1.087273( 7) | 1  | 111.469( 14) | 7  | 124.838( 20)  | 0 |
| 9  | 9    | H    | 2  | 1.088253( 8) | 1  | 105.026( 15) | 7  | -118.580( 21) | 0 |

-----

-304.19246888 Energy CCSD(T)-F12/CVTA-F12

=====  
 Geometry (MP2/AVTZ) 32

-----

Z-MATRIX (ANGSTROMS AND DEGREES)

| CD | Cent | Atom | N1 | Length/X     | N2 | Alpha/Y      | N3 | Beta/Z        | J |
|----|------|------|----|--------------|----|--------------|----|---------------|---|
| 1  | 1    | C    |    |              |    |              |    |               |   |
| 2  | 2    | C    | 1  | 1.503802( 1) |    |              |    |               |   |
| 3  | 3    | O    | 1  | 1.374021( 2) | 2  | 111.383( 9)  |    |               |   |
| 4  | 4    | O    | 1  | 1.209182( 3) | 2  | 125.343( 10) | 3  | 166.120( 16)  | 0 |
| 5  | 5    | O    | 3  | 1.449392( 4) | 1  | 110.505( 11) | 2  | 135.000( 17)  | 0 |
| 6  | 6    | H    | 5  | 0.976696( 5) | 3  | 101.376( 12) | 1  | 0.000( 18)    | 0 |
| 7  | 7    | H    | 2  | 1.089617( 6) | 1  | 111.590( 13) | 3  | 90.000( 19)   | 0 |
| 8  | 8    | H    | 2  | 1.085215( 7) | 1  | 107.087( 14) | 7  | 118.079( 20)  | 0 |
| 9  | 9    | H    | 2  | 1.084359( 8) | 1  | 109.736( 15) | 7  | -120.761( 21) | 0 |

-304.19193678 Energy CCSD(T)-F12/CVTA-F12

=====  
=====

Geometry (MP2/AVTZ) 33

Z-MATRIX (ANGSTROMS AND DEGREES)

| CD | Cent | Atom | N1 | Length/X     | N2 | Alpha/Y      | N3 | Beta/Z        | J |
|----|------|------|----|--------------|----|--------------|----|---------------|---|
| 1  | 1    | C    |    |              |    |              |    |               |   |
| 2  | 2    | C    | 1  | 1.498508( 1) |    |              |    |               |   |
| 3  | 3    | O    | 1  | 1.374022( 2) | 2  | 110.351( 9)  |    |               |   |
| 4  | 4    | O    | 1  | 1.208949( 3) | 2  | 125.772( 10) | 3  | 164.698( 16)  | 0 |
| 5  | 5    | O    | 3  | 1.448611( 4) | 1  | 110.509( 11) | 2  | 135.000( 17)  | 0 |
| 6  | 6    | H    | 5  | 0.977054( 5) | 3  | 101.336( 12) | 1  | 0.000( 18)    | 0 |
| 7  | 7    | H    | 2  | 1.084381( 6) | 1  | 109.394( 13) | 3  | 180.000( 19)  | 0 |
| 8  | 8    | H    | 2  | 1.088564( 7) | 1  | 105.890( 14) | 7  | 118.413( 20)  | 0 |
| 9  | 9    | H    | 2  | 1.087690( 8) | 1  | 112.495( 15) | 7  | -124.059( 21) | 0 |

-304.19394472 Energy CCSD(T)-F12/CVTA-F12

=====  
=====

Geometry (MP2/AVTZ) 34

Z-MATRIX (ANGSTROMS AND DEGREES)

| CD | Cent | Atom | N1 | Length/X     | N2 | Alpha/Y      | N3 | Beta/Z        | J |
|----|------|------|----|--------------|----|--------------|----|---------------|---|
| 1  | 1    | C    |    |              |    |              |    |               |   |
| 2  | 2    | C    | 1  | 1.497701( 1) |    |              |    |               |   |
| 3  | 3    | O    | 1  | 1.372995( 2) | 2  | 110.437( 9)  |    |               |   |
| 4  | 4    | O    | 1  | 1.208730( 3) | 2  | 125.620( 10) | 3  | 164.903( 16)  | 0 |
| 5  | 5    | O    | 3  | 1.448913( 4) | 1  | 110.472( 11) | 2  | 135.000( 17)  | 0 |
| 6  | 6    | H    | 5  | 0.977131( 5) | 3  | 101.285( 12) | 1  | 0.000( 18)    | 0 |
| 7  | 7    | H    | 2  | 1.089428( 6) | 1  | 104.818( 13) | 3  | 270.000( 19)  | 0 |
| 8  | 8    | H    | 2  | 1.085447( 7) | 1  | 112.300( 14) | 7  | 118.355( 20)  | 0 |
| 9  | 9    | H    | 2  | 1.085798( 8) | 1  | 110.500( 15) | 7  | -117.030( 21) | 0 |

-304.19433352 Energy CCSD(T)-F12/CVTA-F12

=====  
=====

Geometry (MP2/AVTZ) 35

Z-MATRIX (ANGSTROMS AND DEGREES)

| CD | Cent | Atom | N1 | Length/X | N2 | Alpha/Y | N3 | Beta/Z | J |
|----|------|------|----|----------|----|---------|----|--------|---|
| 1  | 1    | C    |    |          |    |         |    |        |   |

```

2  2 C   1  1.498264( 1)
3  3 O   1  1.379150( 2)  2 111.904( 9)
4  4 O   1  1.206831( 3)  2 126.235( 10)  3 172.156( 16)  0
5  5 O   3  1.446949( 4)  1 108.704( 11)  2 135.000( 17)  0
6  6 H   5  0.976616( 5)  3 100.794( 12)  1  45.000( 18)  0
7  7 H   2  1.083923( 6)  1 111.671( 13)  3  0.000( 19)  0
8  8 H   2  1.087088( 7)  1 111.036( 14)  7 124.731( 20)  0
9  9 H   2  1.088894( 8)  1 105.499( 15)  7 -118.595( 21)  0

```

-----  
-304.19731969 Energy CCSD(T)-F12/CVTA-F12  
=====

=====  
Geometry (MP2/AVTZ) 36  
-----

Z-MATRIX (ANGSTROMS AND DEGREES)

| CD | Cent | Atom | N1 | Length/X     | N2 | Alpha/Y      | N3 | Beta/Z        | J |
|----|------|------|----|--------------|----|--------------|----|---------------|---|
| 1  | 1    | C    |    |              |    |              |    |               |   |
| 2  | 2    | C    | 1  | 1.499016( 1) |    |              |    |               |   |
| 3  | 3    | O    | 1  | 1.380518( 2) | 2  | 111.896( 9)  |    |               |   |
| 4  | 4    | O    | 1  | 1.207003( 3) | 2  | 126.459( 10) | 3  | 172.469( 16)  | 0 |
| 5  | 5    | O    | 3  | 1.446808( 4) | 1  | 108.593( 11) | 2  | 135.000( 17)  | 0 |
| 6  | 6    | H    | 5  | 0.976504( 5) | 3  | 100.760( 12) | 1  | 45.000( 18)   | 0 |
| 7  | 7    | H    | 2  | 1.089836( 6) | 1  | 110.728( 13) | 3  | 90.000( 19)   | 0 |
| 8  | 8    | H    | 2  | 1.085611( 7) | 1  | 107.477( 14) | 7  | 117.690( 20)  | 0 |
| 9  | 9    | H    | 2  | 1.084283( 8) | 1  | 110.210( 15) | 7  | -120.732( 21) | 0 |

-----  
-304.19687817 Energy CCSD(T)-F12/CVTA-F12  
=====

=====  
Geometry (MP2/AVTZ) 37  
-----

Z-MATRIX (ANGSTROMS AND DEGREES)

| CD | Cent | Atom | N1 | Length/X     | N2 | Alpha/Y      | N3 | Beta/Z        | J |
|----|------|------|----|--------------|----|--------------|----|---------------|---|
| 1  | 1    | C    |    |              |    |              |    |               |   |
| 2  | 2    | C    | 1  | 1.494286( 1) |    |              |    |               |   |
| 3  | 3    | O    | 1  | 1.380584( 2) | 2  | 110.806( 9)  |    |               |   |
| 4  | 4    | O    | 1  | 1.206623( 3) | 2  | 127.169( 10) | 3  | 171.304( 16)  | 0 |
| 5  | 5    | O    | 3  | 1.446312( 4) | 1  | 108.616( 11) | 2  | 135.000( 17)  | 0 |
| 6  | 6    | H    | 5  | 0.976456( 5) | 3  | 100.762( 12) | 1  | 45.000( 18)   | 0 |
| 7  | 7    | H    | 2  | 1.084371( 6) | 1  | 109.569( 13) | 3  | 180.000( 19)  | 0 |
| 8  | 8    | H    | 2  | 1.088565( 7) | 1  | 106.729( 14) | 7  | 119.187( 20)  | 0 |
| 9  | 9    | H    | 2  | 1.088189( 8) | 1  | 111.586( 15) | 7  | -123.376( 21) | 0 |

-----  
-304.19862142 Energy CCSD(T)-F12/CVTA-F12  
=====

=====  
Geometry (MP2/AVTZ) 38  
-----

Z-MATRIX (ANGSTROMS AND DEGREES)

| CD | Cent | Atom | N1 | Length/X     | N2 | Alpha/Y      | N3 | Beta/Z       | J |
|----|------|------|----|--------------|----|--------------|----|--------------|---|
| 1  | 1    | C    |    |              |    |              |    |              |   |
| 2  | 2    | C    | 1  | 1.493814( 1) |    |              |    |              |   |
| 3  | 3    | O    | 1  | 1.379355( 2) | 2  | 110.902( 9)  |    |              |   |
| 4  | 4    | O    | 1  | 1.206519( 3) | 2  | 126.920( 10) | 3  | 171.267( 16) | 0 |

|   |   |   |   |              |   |              |   |               |   |
|---|---|---|---|--------------|---|--------------|---|---------------|---|
| 5 | 5 | O | 3 | 1.446598( 4) | 1 | 108.705( 11) | 2 | 135.000( 17)  | 0 |
| 6 | 6 | H | 5 | 0.976561( 5) | 3 | 100.778( 12) | 1 | 45.000( 18)   | 0 |
| 7 | 7 | H | 2 | 1.089995( 6) | 1 | 105.444( 13) | 3 | 270.000( 19)  | 0 |
| 8 | 8 | H | 2 | 1.085730( 7) | 1 | 111.807( 14) | 7 | 118.037( 20)  | 0 |
| 9 | 9 | H | 2 | 1.085473( 8) | 1 | 110.448( 15) | 7 | -117.511( 21) | 0 |

-304.19896823 Energy CCSD(T)-F12/CVTA-F12

=====  
 Geometry (MP2/AVTZ) 39

Z-MATRIX (ANGSTROMS AND DEGREES)

| CD | Cent | Atom | N1 | Length/X     | N2 | Alpha/Y      | N3 | Beta/Z        | J |
|----|------|------|----|--------------|----|--------------|----|---------------|---|
| 1  | 1    | C    |    |              |    |              |    |               |   |
| 2  | 2    | C    | 1  | 1.500150( 1) |    |              |    |               |   |
| 3  | 3    | O    | 1  | 1.394183( 2) | 2  | 110.635( 9)  |    |               |   |
| 4  | 4    | O    | 1  | 1.200390( 3) | 2  | 126.622( 10) | 3  | 175.432( 16)  | 0 |
| 5  | 5    | O    | 3  | 1.443146( 4) | 1  | 108.510( 11) | 2  | 135.000( 17)  | 0 |
| 6  | 6    | H    | 5  | 0.970126( 5) | 3  | 101.533( 12) | 1  | 90.000( 18)   | 0 |
| 7  | 7    | H    | 2  | 1.084009( 6) | 1  | 111.900( 13) | 3  | 0.000( 19)    | 0 |
| 8  | 8    | H    | 2  | 1.087074( 7) | 1  | 110.531( 14) | 7  | 124.449( 20)  | 0 |
| 9  | 9    | H    | 2  | 1.089051( 8) | 1  | 105.982( 15) | 7  | -118.911( 21) | 0 |

-304.19589793 Energy CCSD(T)-F12/CVTA-F12

=====  
 Geometry (MP2/AVTZ) 40

Z-MATRIX (ANGSTROMS AND DEGREES)

| CD | Cent | Atom | N1 | Length/X     | N2 | Alpha/Y      | N3 | Beta/Z        | J |
|----|------|------|----|--------------|----|--------------|----|---------------|---|
| 1  | 1    | C    |    |              |    |              |    |               |   |
| 2  | 2    | C    | 1  | 1.500566( 1) |    |              |    |               |   |
| 3  | 3    | O    | 1  | 1.395538( 2) | 2  | 110.606( 9)  |    |               |   |
| 4  | 4    | O    | 1  | 1.200534( 3) | 2  | 126.883( 10) | 3  | 176.006( 16)  | 0 |
| 5  | 5    | O    | 3  | 1.442822( 4) | 1  | 108.336( 11) | 2  | 135.000( 17)  | 0 |
| 6  | 6    | H    | 5  | 0.970026( 5) | 3  | 101.453( 12) | 1  | 90.000( 18)   | 0 |
| 7  | 7    | H    | 2  | 1.089979( 6) | 1  | 110.143( 13) | 3  | 90.000( 19)   | 0 |
| 8  | 8    | H    | 2  | 1.085795( 7) | 1  | 107.660( 14) | 7  | 117.391( 20)  | 0 |
| 9  | 9    | H    | 2  | 1.084207( 8) | 1  | 110.763( 15) | 7  | -120.703( 21) | 0 |

-304.19556039 Energy CCSD(T)-F12/CVTA-F12

=====  
 Geometry (MP2/AVTZ) 41

Z-MATRIX (ANGSTROMS AND DEGREES)

| CD | Cent | Atom | N1 | Length/X     | N2 | Alpha/Y      | N3 | Beta/Z       | J |
|----|------|------|----|--------------|----|--------------|----|--------------|---|
| 1  | 1    | C    |    |              |    |              |    |              |   |
| 2  | 2    | C    | 1  | 1.496414( 1) |    |              |    |              |   |
| 3  | 3    | O    | 1  | 1.395550( 2) | 2  | 109.461( 9)  |    |              |   |
| 4  | 4    | O    | 1  | 1.200195( 3) | 2  | 127.680( 10) | 3  | 174.789( 16) | 0 |
| 5  | 5    | O    | 3  | 1.442594( 4) | 1  | 108.439( 11) | 2  | 135.000( 17) | 0 |
| 6  | 6    | H    | 5  | 0.969929( 5) | 3  | 101.444( 12) | 1  | 90.000( 18)  | 0 |
| 7  | 7    | H    | 2  | 1.084418( 6) | 1  | 109.471( 13) | 3  | 180.000( 19) | 0 |

8 8 H 2 1.088341( 7) 1 107.462( 14) 7 119.569( 20) 0  
9 9 H 2 1.088479( 8) 1 111.168( 15) 7 -122.881( 21) 0

-----  
-304.19716128 Energy CCSD(T)-F12/CVTA-F12  
=====

=====  
Geometry (MP2/AVTZ) 42  
-----

Z-MATRIX (ANGSTROMS AND DEGREES)  
CD Cent Atom N1 Length/X N2 Alpha/Y N3 Beta/Z J  
-----  
1 1 C  
2 2 C 1 1.496116( 1)  
3 3 O 1 1.394232( 2) 2 109.559( 9)  
4 4 O 1 1.200116( 3) 2 127.393( 10) 3 174.535( 16) 0  
5 5 O 3 1.442968( 4) 1 108.567( 11) 2 135.000( 17) 0  
6 6 H 5 0.970055( 5) 3 101.506( 12) 1 90.000( 18) 0  
7 7 H 2 1.090072( 6) 1 106.020( 13) 3 270.000( 19) 0  
8 8 H 2 1.085914( 7) 1 111.715( 14) 7 118.073( 20) 0  
9 9 H 2 1.085347( 8) 1 110.202( 15) 7 -117.723( 21) 0  
-----

-----  
-304.19744366 Energy CCSD(T)-F12/CVTA-F12  
=====

=====  
Geometry (MP2/AVTZ) 43  
-----

Z-MATRIX (ANGSTROMS AND DEGREES)  
CD Cent Atom N1 Length/X N2 Alpha/Y N3 Beta/Z J  
-----  
1 1 C  
2 2 C 1 1.502139( 1)  
3 3 O 1 1.396282( 2) 2 109.975( 9)  
4 4 O 1 1.198282( 3) 2 126.429( 10) 3 174.783( 16) 0  
5 5 O 3 1.450700( 4) 1 107.674( 11) 2 135.000( 17) 0  
6 6 H 5 0.968253( 5) 3 99.512( 12) 1 135.000( 18) 0  
7 7 H 2 1.083969( 6) 1 112.080( 13) 3 0.000( 19) 0  
8 8 H 2 1.087040( 7) 1 110.507( 14) 7 124.592( 20) 0  
9 9 H 2 1.089041( 8) 1 105.876( 15) 7 -118.862( 21) 0  
-----

-----  
-304.19288664 Energy CCSD(T)-F12/CVTA-F12  
=====

=====  
Geometry (MP2/AVTZ) 44  
-----

Z-MATRIX (ANGSTROMS AND DEGREES)  
CD Cent Atom N1 Length/X N2 Alpha/Y N3 Beta/Z J  
-----  
1 1 C  
2 2 C 1 1.502863( 1)  
3 3 O 1 1.397008( 2) 2 109.931( 9)  
4 4 O 1 1.198521( 3) 2 126.661( 10) 3 175.346( 16) 0  
5 5 O 3 1.450558( 4) 1 107.553( 11) 2 135.000( 17) 0  
6 6 H 5 0.968149( 5) 3 99.430( 12) 1 135.000( 18) 0  
7 7 H 2 1.090048( 6) 1 110.214( 13) 3 90.000( 19) 0  
8 8 H 2 1.085807( 7) 1 107.456( 14) 7 117.168( 20) 0  
9 9 H 2 1.084046( 8) 1 110.928( 15) 7 -120.939( 21) 0  
-----

-304.19253599 Energy CCSD(T)-F12/CVTA-F12

=====  
Geometry (MP2/AVTZ) 45

Z-MATRIX (ANGSTROMS AND DEGREES)

| CD | Cent | Atom | N1 | Length/X     | N2 | Alpha/Y      | N3 | Beta/Z        | J |
|----|------|------|----|--------------|----|--------------|----|---------------|---|
| 1  | 1    | C    |    |              |    |              |    |               |   |
| 2  | 2    | C    | 1  | 1.498486( 1) |    |              |    |               |   |
| 3  | 3    | O    | 1  | 1.397328( 2) | 2  | 108.755( 9)  |    |               |   |
| 4  | 4    | O    | 1  | 1.198127( 3) | 2  | 127.493( 10) | 3  | 173.952( 16)  | 0 |
| 5  | 5    | O    | 3  | 1.449980( 4) | 1  | 107.632( 11) | 2  | 135.000( 17)  | 0 |
| 6  | 6    | H    | 5  | 0.968114( 5) | 3  | 99.424( 12)  | 1  | 135.000( 18)  | 0 |
| 7  | 7    | H    | 2  | 1.084451( 6) | 1  | 109.331( 13) | 3  | 180.000( 19)  | 0 |
| 8  | 8    | H    | 2  | 1.088288( 7) | 1  | 107.435( 14) | 7  | 119.383( 20)  | 0 |
| 9  | 9    | H    | 2  | 1.088433( 8) | 1  | 111.377( 15) | 7  | -122.925( 21) | 0 |

-304.19420019 Energy CCSD(T)-F12/CVTA-F12

=====  
Geometry (MP2/AVTZ) 46

Z-MATRIX (ANGSTROMS AND DEGREES)

| CD | Cent | Atom | N1 | Length/X     | N2 | Alpha/Y      | N3 | Beta/Z        | J |
|----|------|------|----|--------------|----|--------------|----|---------------|---|
| 1  | 1    | C    |    |              |    |              |    |               |   |
| 2  | 2    | C    | 1  | 1.498002( 1) |    |              |    |               |   |
| 3  | 3    | O    | 1  | 1.396494( 2) | 2  | 108.861( 9)  |    |               |   |
| 4  | 4    | O    | 1  | 1.197969( 3) | 2  | 127.214( 10) | 3  | 173.768( 16)  | 0 |
| 5  | 5    | O    | 3  | 1.450319( 4) | 1  | 107.709( 11) | 2  | 135.000( 17)  | 0 |
| 6  | 6    | H    | 5  | 0.968221( 5) | 3  | 99.453( 12)  | 1  | 135.000( 18)  | 0 |
| 7  | 7    | H    | 2  | 1.089958( 6) | 1  | 106.008( 13) | 3  | 270.000( 19)  | 0 |
| 8  | 8    | H    | 2  | 1.085903( 7) | 1  | 111.896( 14) | 7  | 118.209( 20)  | 0 |
| 9  | 9    | H    | 2  | 1.085396( 8) | 1  | 110.073( 15) | 7  | -117.621( 21) | 0 |

-304.19449019 Energy CCSD(T)-F12/CVTA-F12

=====  
Geometry (MP2/AVTZ) 47

Z-MATRIX (ANGSTROMS AND DEGREES)

| CD | Cent | Atom | N1 | Length/X     | N2 | Alpha/Y      | N3 | Beta/Z        | J |
|----|------|------|----|--------------|----|--------------|----|---------------|---|
| 1  | 1    | C    |    |              |    |              |    |               |   |
| 2  | 2    | C    | 1  | 1.503019( 1) |    |              |    |               |   |
| 3  | 3    | O    | 1  | 1.391710( 2) | 2  | 110.299( 9)  |    |               |   |
| 4  | 4    | O    | 1  | 1.198370( 3) | 2  | 126.286( 10) | 3  | 173.878( 16)  | 0 |
| 5  | 5    | O    | 3  | 1.461502( 4) | 1  | 106.609( 11) | 2  | 135.000( 17)  | 0 |
| 6  | 6    | H    | 5  | 0.968707( 5) | 3  | 97.122( 12)  | 1  | 180.000( 18)  | 0 |
| 7  | 7    | H    | 2  | 1.083983( 6) | 1  | 112.178( 13) | 3  | 0.000( 19)    | 0 |
| 8  | 8    | H    | 2  | 1.087040( 7) | 1  | 110.648( 14) | 7  | 124.736( 20)  | 0 |
| 9  | 9    | H    | 2  | 1.089002( 8) | 1  | 105.681( 15) | 7  | -118.762( 21) | 0 |

-304.19087433 Energy CCSD(T)-F12/CVTA-F12

Geometry (MP2/AVTZ) 48

-----  
Z-MATRIX (ANGSTROMS AND DEGREES)  
-----

| CD | Cent | Atom | N1 | Length/X     | N2 | Alpha/Y      | N3 | Beta/Z        | J |
|----|------|------|----|--------------|----|--------------|----|---------------|---|
| 1  | 1    | C    |    |              |    |              |    |               |   |
| 2  | 2    | C    | 1  | 1.503453( 1) |    |              |    |               |   |
| 3  | 3    | O    | 1  | 1.393380( 2) | 2  | 110.238( 9)  |    |               |   |
| 4  | 4    | O    | 1  | 1.198448( 3) | 2  | 126.611( 10) | 3  | 174.411( 16)  | 0 |
| 5  | 5    | O    | 3  | 1.461291( 4) | 1  | 106.436( 11) | 2  | 135.000( 17)  | 0 |
| 6  | 6    | H    | 5  | 0.968675( 5) | 3  | 97.108( 12)  | 1  | 180.000( 18)  | 0 |
| 7  | 7    | H    | 2  | 1.089954( 6) | 1  | 110.413( 13) | 3  | 90.000( 19)   | 0 |
| 8  | 8    | H    | 2  | 1.085754( 7) | 1  | 107.427( 14) | 7  | 117.346( 20)  | 0 |
| 9  | 9    | H    | 2  | 1.084165( 8) | 1  | 110.834( 15) | 7  | -120.964( 21) | 0 |

-----

-304.19050532 Energy CCSD(T)-F12/CVTA-F12

=====  
Geometry (MP2/AVTZ) 49

-----  
Z-MATRIX (ANGSTROMS AND DEGREES)  
-----

| CD | Cent | Atom | N1 | Length/X     | N2 | Alpha/Y      | N3 | Beta/Z        | J |
|----|------|------|----|--------------|----|--------------|----|---------------|---|
| 1  | 1    | C    |    |              |    |              |    |               |   |
| 2  | 2    | C    | 1  | 1.498806( 1) |    |              |    |               |   |
| 3  | 3    | O    | 1  | 1.393494( 2) | 2  | 109.017( 9)  |    |               |   |
| 4  | 4    | O    | 1  | 1.198098( 3) | 2  | 127.446( 10) | 3  | 173.043( 16)  | 0 |
| 5  | 5    | O    | 3  | 1.460319( 4) | 1  | 106.507( 11) | 2  | 135.000( 17)  | 0 |
| 6  | 6    | H    | 5  | 0.968646( 5) | 3  | 97.142( 12)  | 1  | 180.000( 18)  | 0 |
| 7  | 7    | H    | 2  | 1.084466( 6) | 1  | 109.372( 13) | 3  | 180.000( 19)  | 0 |
| 8  | 8    | H    | 2  | 1.088300( 7) | 1  | 107.359( 14) | 7  | 119.356( 20)  | 0 |
| 9  | 9    | H    | 2  | 1.088533( 8) | 1  | 111.416( 15) | 7  | -122.905( 21) | 0 |

-----

-304.19227939 Energy CCSD(T)-F12/CVTA-F12

=====  
Geometry (MP2/AVTZ) 50

-----  
Z-MATRIX (ANGSTROMS AND DEGREES)  
-----

| CD | Cent | Atom | N1 | Length/X     | N2 | Alpha/Y      | N3 | Beta/Z        | J |
|----|------|------|----|--------------|----|--------------|----|---------------|---|
| 1  | 1    | C    |    |              |    |              |    |               |   |
| 2  | 2    | C    | 1  | 1.498688( 1) |    |              |    |               |   |
| 3  | 3    | O    | 1  | 1.391387( 2) | 2  | 109.190( 9)  |    |               |   |
| 4  | 4    | O    | 1  | 1.198211( 3) | 2  | 127.013( 10) | 3  | 172.723( 16)  | 0 |
| 5  | 5    | O    | 3  | 1.460795( 4) | 1  | 106.667( 11) | 2  | 135.000( 17)  | 0 |
| 6  | 6    | H    | 5  | 0.968706( 5) | 3  | 97.154( 12)  | 1  | 180.000( 18)  | 0 |
| 7  | 7    | H    | 2  | 1.089951( 6) | 1  | 105.787( 13) | 3  | 270.000( 19)  | 0 |
| 8  | 8    | H    | 2  | 1.085888( 7) | 1  | 112.080( 14) | 7  | 118.325( 20)  | 0 |
| 9  | 9    | H    | 2  | 1.085494( 8) | 1  | 110.096( 15) | 7  | -117.450( 21) | 0 |

-----

-304.19257972 Energy CCSD(T)-F12/CVTA-F12

=====  
Geometry (MP2/AVTZ) 51

-----  
Z-MATRIX (ANGSTROMS AND DEGREES)  
-----



| CD | Cent | Atom | N1 | Length/X     | N2 | Alpha/Y      | N3 | Beta/Z        | J |
|----|------|------|----|--------------|----|--------------|----|---------------|---|
| 1  | 1    | C    |    |              |    |              |    |               |   |
| 2  | 2    | C    | 1  | 1.503217( 1) |    |              |    |               |   |
| 3  | 3    | O    | 1  | 1.395128( 2) | 2  | 110.528( 9)  |    |               |   |
| 4  | 4    | O    | 1  | 1.197564( 3) | 2  | 126.302( 10) | 3  | 174.855( 16)  | 0 |
| 5  | 5    | O    | 3  | 1.459502( 4) | 1  | 107.269( 11) | 2  | 135.000( 17)  | 0 |
| 6  | 6    | H    | 5  | 0.968608( 5) | 3  | 96.970( 12)  | 1  | 225.000( 18)  | 0 |
| 7  | 7    | H    | 2  | 1.084091( 6) | 1  | 112.227( 13) | 3  | 0.000( 19)    | 0 |
| 8  | 8    | H    | 2  | 1.087118( 7) | 1  | 110.545( 14) | 7  | 124.452( 20)  | 0 |
| 9  | 9    | H    | 2  | 1.089014( 8) | 1  | 105.849( 15) | 7  | -119.067( 21) | 0 |

-304.19061259 Energy CCSD(T)-F12/CVTA-F12

=====  
=====

Geometry (MP2/AVTZ) 52

Z-MATRIX (ANGSTROMS AND DEGREES)

| CD | Cent | Atom | N1 | Length/X     | N2 | Alpha/Y      | N3 | Beta/Z        | J |
|----|------|------|----|--------------|----|--------------|----|---------------|---|
| 1  | 1    | C    |    |              |    |              |    |               |   |
| 2  | 2    | C    | 1  | 1.503476( 1) |    |              |    |               |   |
| 3  | 3    | O    | 1  | 1.396625( 2) | 2  | 110.484( 9)  |    |               |   |
| 4  | 4    | O    | 1  | 1.197705( 3) | 2  | 126.614( 10) | 3  | 175.505( 16)  | 0 |
| 5  | 5    | O    | 3  | 1.459270( 4) | 1  | 107.050( 11) | 2  | 135.000( 17)  | 0 |
| 6  | 6    | H    | 5  | 0.968605( 5) | 3  | 97.039( 12)  | 1  | 225.000( 18)  | 0 |
| 7  | 7    | H    | 2  | 1.089979( 6) | 1  | 110.238( 13) | 3  | 90.000( 19)   | 0 |
| 8  | 8    | H    | 2  | 1.085827( 7) | 1  | 107.523( 14) | 7  | 117.278( 20)  | 0 |
| 9  | 9    | H    | 2  | 1.084281( 8) | 1  | 111.053( 15) | 7  | -120.844( 21) | 0 |

-304.19028700 Energy CCSD(T)-F12/CVTA-F12

=====  
=====

Geometry (MP2/AVTZ) 53

Z-MATRIX (ANGSTROMS AND DEGREES)

| CD | Cent | Atom | N1 | Length/X     | N2 | Alpha/Y      | N3 | Beta/Z        | J |
|----|------|------|----|--------------|----|--------------|----|---------------|---|
| 1  | 1    | C    |    |              |    |              |    |               |   |
| 2  | 2    | C    | 1  | 1.498904( 1) |    |              |    |               |   |
| 3  | 3    | O    | 1  | 1.396805( 2) | 2  | 109.252( 9)  |    |               |   |
| 4  | 4    | O    | 1  | 1.197343( 3) | 2  | 127.487( 10) | 3  | 174.167( 16)  | 0 |
| 5  | 5    | O    | 3  | 1.458335( 4) | 1  | 107.151( 11) | 2  | 135.000( 17)  | 0 |
| 6  | 6    | H    | 5  | 0.968606( 5) | 3  | 97.103( 12)  | 1  | 225.000( 18)  | 0 |
| 7  | 7    | H    | 2  | 1.084520( 6) | 1  | 109.405( 13) | 3  | 180.000( 19)  | 0 |
| 8  | 8    | H    | 2  | 1.088401( 7) | 1  | 107.612( 14) | 7  | 119.430( 20)  | 0 |
| 9  | 9    | H    | 2  | 1.088575( 8) | 1  | 111.280( 15) | 7  | -122.798( 21) | 0 |

-304.19202635 Energy CCSD(T)-F12/CVTA-F12

=====  
=====

Geometry (MP2/AVTZ) 54

Z-MATRIX (ANGSTROMS AND DEGREES)

| CD | Cent | Atom | N1 | Length/X | N2 | Alpha/Y | N3 | Beta/Z | J |
|----|------|------|----|----------|----|---------|----|--------|---|
| 1  | 1    | C    |    |          |    |         |    |        |   |

```

2  2 C   1  1.498902(  1)
3  3 O   1  1.394913(  2)  2 109.388(  9)
4  4 O   1  1.197391(  3)  2 127.095( 10)  3 173.816( 16)  0
5  5 O   3  1.459027(  4)  1 107.327( 11)  2 135.000( 17)  0
6  6 H   5  0.968634(  5)  3  97.022( 12)  1 225.000( 18)  0
7  7 H   2  1.090092(  6)  1 105.965( 13)  3 270.000( 19)  0
8  8 H   2  1.085962(  7)  1 112.007( 14)  7 118.430( 20)  0
9  9 H   2  1.085495(  8)  1 110.106( 15)  7 -117.444( 21)  0

```

-----  
-304.19229997 Energy CCSD(T)-F12/CVTA-F12  
=====

=====  
Geometry (MP2/AVTZ) 55  
-----

Z-MATRIX (ANGSTROMS AND DEGREES)

| CD | Cent | Atom | N1           | Length/X | N2           | Alpha/Y | N3            | Beta/Z | J |
|----|------|------|--------------|----------|--------------|---------|---------------|--------|---|
| 1  |      | 1 C  |              |          |              |         |               |        |   |
| 2  | 2 C  | 1    | 1.504129( 1) |          |              |         |               |        |   |
| 3  | 3 O  | 1    | 1.401054( 2) | 2        | 110.236( 9)  |         |               |        |   |
| 4  | 4 O  | 1    | 1.197409( 3) | 2        | 126.165( 10) | 3       | 174.719( 16)  | 0      |   |
| 5  | 5 O  | 3    | 1.450058( 4) | 1        | 109.187( 11) | 2       | 135.000( 17)  | 0      |   |
| 6  | 6 H  | 5    | 0.968861( 5) | 3        | 99.207( 12)  | 1       | 270.000( 18)  | 0      |   |
| 7  | 7 H  | 2    | 1.084115( 6) | 1        | 112.210( 13) | 3       | 0.000( 19)    | 0      |   |
| 8  | 8 H  | 2    | 1.087223( 7) | 1        | 110.406( 14) | 7       | 124.181( 20)  | 0      |   |
| 9  | 9 H  | 2    | 1.089062( 8) | 1        | 106.084( 15) | 7       | -119.441( 21) | 0      |   |

-----  
-304.18959268 Energy CCSD(T)-F12/CVTA-F12  
=====

=====  
Geometry (MP2/AVTZ) 56  
-----

Z-MATRIX (ANGSTROMS AND DEGREES)

| CD | Cent | Atom | N1           | Length/X | N2           | Alpha/Y | N3            | Beta/Z | J |
|----|------|------|--------------|----------|--------------|---------|---------------|--------|---|
| 1  |      | 1 C  |              |          |              |         |               |        |   |
| 2  | 2 C  | 1    | 1.504230( 1) |          |              |         |               |        |   |
| 3  | 3 O  | 1    | 1.402176( 2) | 2        | 110.172( 9)  |         |               |        |   |
| 4  | 4 O  | 1    | 1.197593( 3) | 2        | 126.470( 10) | 3       | 175.436( 16)  | 0      |   |
| 5  | 5 O  | 3    | 1.449582( 4) | 1        | 108.982( 11) | 2       | 135.000( 17)  | 0      |   |
| 6  | 6 H  | 5    | 0.968955( 5) | 3        | 99.348( 12)  | 1       | 270.000( 18)  | 0      |   |
| 7  | 7 H  | 2    | 1.090097( 6) | 1        | 110.057( 13) | 3       | 90.000( 19)   | 0      |   |
| 8  | 8 H  | 2    | 1.085864( 7) | 1        | 107.637( 14) | 7       | 117.164( 20)  | 0      |   |
| 9  | 9 H  | 2    | 1.084393( 8) | 1        | 111.208( 15) | 7       | -120.596( 21) | 0      |   |

-----  
-304.18932765 Energy CCSD(T)-F12/CVTA-F12  
=====

=====  
Geometry (MP2/AVTZ) 57  
-----

Z-MATRIX (ANGSTROMS AND DEGREES)

| CD | Cent | Atom | N1           | Length/X | N2           | Alpha/Y | N3           | Beta/Z | J |
|----|------|------|--------------|----------|--------------|---------|--------------|--------|---|
| 1  |      | 1 C  |              |          |              |         |              |        |   |
| 2  | 2 C  | 1    | 1.499895( 1) |          |              |         |              |        |   |
| 3  | 3 O  | 1    | 1.402090( 2) | 2        | 108.971( 9)  |         |              |        |   |
| 4  | 4 O  | 1    | 1.197285( 3) | 2        | 127.290( 10) | 3       | 174.003( 16) | 0      |   |

|   |   |   |   |              |   |              |   |               |   |
|---|---|---|---|--------------|---|--------------|---|---------------|---|
| 5 | 5 | O | 3 | 1.448834( 4) | 1 | 109.106( 11) | 2 | 135.000( 17)  | 0 |
| 6 | 6 | H | 5 | 0.968987( 5) | 3 | 99.414( 12)  | 1 | 270.000( 18)  | 0 |
| 7 | 7 | H | 2 | 1.084536( 6) | 1 | 109.398( 13) | 3 | 180.000( 19)  | 0 |
| 8 | 8 | H | 2 | 1.088611( 7) | 1 | 107.801( 14) | 7 | 119.459( 20)  | 0 |
| 9 | 9 | H | 2 | 1.088466( 8) | 1 | 111.268( 15) | 7 | -122.885( 21) | 0 |

-304.19098542 Energy CCSD(T)-F12/CVTA-F12

=====  
 Geometry (MP2/AVTZ) 58

Z-MATRIX (ANGSTROMS AND DEGREES)

| CD | Cent | Atom | N1 | Length/X     | N2 | Alpha/Y      | N3 | Beta/Z        | J |
|----|------|------|----|--------------|----|--------------|----|---------------|---|
| 1  | 1    | C    |    |              |    |              |    |               |   |
| 2  | 2    | C    | 1  | 1.499882( 1) |    |              |    |               |   |
| 3  | 3    | O    | 1  | 1.401039( 2) | 2  | 109.085( 9)  |    |               |   |
| 4  | 4    | O    | 1  | 1.197151( 3) | 2  | 126.980( 10) | 3  | 173.696( 16)  | 0 |
| 5  | 5    | O    | 3  | 1.449705( 4) | 1  | 109.271( 11) | 2  | 135.000( 17)  | 0 |
| 6  | 6    | H    | 5  | 0.968898( 5) | 3  | 99.301( 12)  | 1  | 270.000( 18)  | 0 |
| 7  | 7    | H    | 2  | 1.090261( 6) | 1  | 106.231( 13) | 3  | 270.000( 19)  | 0 |
| 8  | 8    | H    | 2  | 1.085908( 7) | 1  | 111.927( 14) | 7  | 118.494( 20)  | 0 |
| 9  | 9    | H    | 2  | 1.085481( 8) | 1  | 110.066( 15) | 7  | -117.399( 21) | 0 |

-304.19121603 Energy CCSD(T)-F12/CVTA-F12

=====  
 Geometry (MP2/AVTZ) 59

Z-MATRIX (ANGSTROMS AND DEGREES)

| CD | Cent | Atom | N1 | Length/X     | N2 | Alpha/Y      | N3 | Beta/Z        | J |
|----|------|------|----|--------------|----|--------------|----|---------------|---|
| 1  | 1    | C    |    |              |    |              |    |               |   |
| 2  | 2    | C    | 1  | 1.505203( 1) |    |              |    |               |   |
| 3  | 3    | O    | 1  | 1.390625( 2) | 2  | 110.246( 9)  |    |               |   |
| 4  | 4    | O    | 1  | 1.201617( 3) | 2  | 125.616( 10) | 3  | 170.489( 16)  | 0 |
| 5  | 5    | O    | 3  | 1.449786( 4) | 1  | 110.930( 11) | 2  | 135.000( 17)  | 0 |
| 6  | 6    | H    | 5  | 0.970513( 5) | 3  | 101.786( 12) | 1  | 315.000( 18)  | 0 |
| 7  | 7    | H    | 2  | 1.083841( 6) | 1  | 112.071( 13) | 3  | 0.000( 19)    | 0 |
| 8  | 8    | H    | 2  | 1.087259( 7) | 1  | 110.755( 14) | 7  | 124.516( 20)  | 0 |
| 9  | 9    | H    | 2  | 1.088785( 8) | 1  | 105.663( 15) | 7  | -119.163( 21) | 0 |

-304.18766941 Energy CCSD(T)-F12/CVTA-F12

=====  
 Geometry (MP2/AVTZ) 60

Z-MATRIX (ANGSTROMS AND DEGREES)

| CD | Cent | Atom | N1 | Length/X     | N2 | Alpha/Y      | N3 | Beta/Z       | J |
|----|------|------|----|--------------|----|--------------|----|--------------|---|
| 1  | 1    | C    |    |              |    |              |    |              |   |
| 2  | 2    | C    | 1  | 1.505460( 1) |    |              |    |              |   |
| 3  | 3    | O    | 1  | 1.391926( 2) | 2  | 110.178( 9)  |    |              |   |
| 4  | 4    | O    | 1  | 1.201793( 3) | 2  | 125.945( 10) | 3  | 170.895( 16) | 0 |
| 5  | 5    | O    | 3  | 1.449171( 4) | 1  | 110.784( 11) | 2  | 135.000( 17) | 0 |
| 6  | 6    | H    | 5  | 0.970626( 5) | 3  | 101.875( 12) | 1  | 315.000( 18) | 0 |
| 7  | 7    | H    | 2  | 1.089903( 6) | 1  | 110.674( 13) | 3  | 90.000( 19)  | 0 |

8 8 H 2 1.085664( 7) 1 107.390( 14) 7 117.449( 20) 0  
9 9 H 2 1.084326( 8) 1 110.635( 15) 7 -120.649( 21) 0

-----  
-304.18732843 Energy CCSD(T)-F12/CVTA-F12  
=====

=====

Geometry (MP2/AVTZ) 61

-----  
Z-MATRIX (ANGSTROMS AND DEGREES)  
CD Cent Atom N1 Length/X N2 Alpha/Y N3 Beta/Z J  
-----  
1 1 C  
2 2 C 1 1.500820( 1)  
3 3 O 1 1.391328( 2) 2 109.064( 9)  
4 4 O 1 1.201581( 3) 2 126.560( 10) 3 169.320( 16) 0  
5 5 O 3 1.448279( 4) 1 110.843( 11) 2 135.000( 17) 0  
6 6 H 5 0.970752( 5) 3 101.911( 12) 1 315.000( 18) 0  
7 7 H 2 1.084474( 6) 1 109.326( 13) 3 180.000( 19) 0  
8 8 H 2 1.088559( 7) 1 107.117( 14) 7 119.135( 20) 0  
9 9 H 2 1.088173( 8) 1 111.807( 15) 7 -123.327( 21) 0  
-----

-----  
-304.18913653 Energy CCSD(T)-F12/CVTA-F12  
=====

=====

Geometry (MP2/AVTZ) 62

-----  
Z-MATRIX (ANGSTROMS AND DEGREES)  
CD Cent Atom N1 Length/X N2 Alpha/Y N3 Beta/Z J  
-----  
1 1 C  
2 2 C 1 1.500641( 1)  
3 3 O 1 1.390397( 2) 2 109.187( 9)  
4 4 O 1 1.201413( 3) 2 126.260( 10) 3 169.283( 16) 0  
5 5 O 3 1.448965( 4) 1 110.957( 11) 2 135.000( 17) 0  
6 6 H 5 0.970638( 5) 3 101.822( 12) 1 315.000( 18) 0  
7 7 H 2 1.089886( 6) 1 105.753( 13) 3 270.000( 19) 0  
8 8 H 2 1.085619( 7) 1 112.165( 14) 7 118.460( 20) 0  
9 9 H 2 1.085628( 8) 1 110.120( 15) 7 -117.170( 21) 0  
-----

-----  
-304.18940149 Energy CCSD(T)-F12/CVTA-F12  
=====

=====

Geometry (MP2/AVTZ) 63

-----  
Z-MATRIX (ANGSTROMS AND DEGREES)  
CD Cent Atom N1 Length/X N2 Alpha/Y N3 Beta/Z J  
-----  
1 1 C  
2 2 C 1 1.503818( 1)  
3 3 O 1 1.414320( 2) 2 113.863( 9)  
4 4 O 1 1.199197( 3) 2 125.677( 10) 3 182.123( 16) 0  
5 5 O 3 1.470227( 4) 1 107.367( 11) 2 90.000( 17) 0  
6 6 H 5 0.971606( 5) 3 104.321( 12) 1 0.000( 18) 0  
7 7 H 2 1.083676( 6) 1 111.579( 13) 3 0.000( 19) 0  
8 8 H 2 1.088634( 7) 1 107.985( 14) 7 121.094( 20) 0  
9 9 H 2 1.088866( 8) 1 109.338( 15) 7 -122.651( 21) 0  
-----

-304.17141615 Energy CCSD(T)-F12/CVTA-F12

=====  
Geometry (MP2/AVTZ) 64

Z-MATRIX (ANGSTROMS AND DEGREES)

| CD | Cent | Atom | N1 | Length/X     | N2 | Alpha/Y      | N3 | Beta/Z        | J |
|----|------|------|----|--------------|----|--------------|----|---------------|---|
| 1  | 1    | C    |    |              |    |              |    |               |   |
| 2  | 2    | C    | 1  | 1.499511( 1) |    |              |    |               |   |
| 3  | 3    | O    | 1  | 1.415632( 2) | 2  | 112.775( 9)  |    |               |   |
| 4  | 4    | O    | 1  | 1.198733( 3) | 2  | 126.611( 10) | 3  | 183.050( 16)  | 0 |
| 5  | 5    | O    | 3  | 1.468754( 4) | 1  | 107.249( 11) | 2  | 90.000( 17)   | 0 |
| 6  | 6    | H    | 5  | 0.971802( 5) | 3  | 104.350( 12) | 1  | 0.000( 18)    | 0 |
| 7  | 7    | H    | 2  | 1.090781( 6) | 1  | 107.282( 13) | 3  | 90.000( 19)   | 0 |
| 8  | 8    | H    | 2  | 1.086280( 7) | 1  | 110.054( 14) | 7  | 117.062( 20)  | 0 |
| 9  | 9    | H    | 2  | 1.085437( 8) | 1  | 111.185( 15) | 7  | -118.633( 21) | 0 |

-304.17284777 Energy CCSD(T)-F12/CVTA-F12

=====  
Geometry (MP2/AVTZ) 65

Z-MATRIX (ANGSTROMS AND DEGREES)

| CD | Cent | Atom | N1 | Length/X     | N2 | Alpha/Y      | N3 | Beta/Z        | J |
|----|------|------|----|--------------|----|--------------|----|---------------|---|
| 1  | 1    | C    |    |              |    |              |    |               |   |
| 2  | 2    | C    | 1  | 1.495979( 1) |    |              |    |               |   |
| 3  | 3    | O    | 1  | 1.416722( 2) | 2  | 112.025( 9)  |    |               |   |
| 4  | 4    | O    | 1  | 1.198757( 3) | 2  | 127.335( 10) | 3  | 182.182( 16)  | 0 |
| 5  | 5    | O    | 3  | 1.469308( 4) | 1  | 107.624( 11) | 2  | 90.000( 17)   | 0 |
| 6  | 6    | H    | 5  | 0.971575( 5) | 3  | 104.254( 12) | 1  | 0.000( 18)    | 0 |
| 7  | 7    | H    | 2  | 1.084493( 6) | 1  | 110.584( 13) | 3  | 180.000( 19)  | 0 |
| 8  | 8    | H    | 2  | 1.089267( 7) | 1  | 109.761( 14) | 7  | 122.919( 20)  | 0 |
| 9  | 9    | H    | 2  | 1.089350( 8) | 1  | 108.154( 15) | 7  | -120.985( 21) | 0 |

-304.17368331 Energy CCSD(T)-F12/CVTA-F12

=====  
Geometry (MP2/AVTZ) 66

Z-MATRIX (ANGSTROMS AND DEGREES)

| CD | Cent | Atom | N1 | Length/X     | N2 | Alpha/Y      | N3 | Beta/Z        | J |
|----|------|------|----|--------------|----|--------------|----|---------------|---|
| 1  | 1    | C    |    |              |    |              |    |               |   |
| 2  | 2    | C    | 1  | 1.500271( 1) |    |              |    |               |   |
| 3  | 3    | O    | 1  | 1.415349( 2) | 2  | 113.146( 9)  |    |               |   |
| 4  | 4    | O    | 1  | 1.199195( 3) | 2  | 126.354( 10) | 3  | 180.775( 16)  | 0 |
| 5  | 5    | O    | 3  | 1.470244( 4) | 1  | 107.818( 11) | 2  | 90.000( 17)   | 0 |
| 6  | 6    | H    | 5  | 0.971333( 5) | 3  | 104.221( 12) | 1  | 0.000( 18)    | 0 |
| 7  | 7    | H    | 2  | 1.091378( 6) | 1  | 108.584( 13) | 3  | 270.000( 19)  | 0 |
| 8  | 8    | H    | 2  | 1.084627( 7) | 1  | 110.905( 14) | 7  | 119.195( 20)  | 0 |
| 9  | 9    | H    | 2  | 1.085825( 8) | 1  | 109.364( 15) | 7  | -117.217( 21) | 0 |

-304.17223358 Energy CCSD(T)-F12/CVTA-F12

Geometry (MP2/AVTZ) 67

```

-----
                Z-MATRIX (ANGSTROMS AND DEGREES)
  CD  Cent  Atom  N1   Length/X    N2   Alpha/Y    N3   Beta/Z    J
-----
  1   1  C
  2   2  C    1  1.499076( 1)
  3   3  O    1  1.417498( 2)  2  114.288( 9)
  4   4  O    1  1.200411( 3)  2  126.146( 10)  3  179.553( 16)  0
  5   5  O    3  1.462940( 4)  1  103.793( 11)  2  90.000( 17)  0
  6   6  H    5  0.973289( 5)  3  101.632( 12)  1  45.000( 18)  0
  7   7  H    2  1.083315( 6)  1  111.415( 13)  3  0.000( 19)  0
  8   8  H    2  1.088623( 7)  1  108.567( 14)  7  121.665( 20)  0
  9   9  H    2  1.088296( 8)  1  108.617( 15)  7 -121.744( 21)  0
-----

```

-304.17972766 Energy CCSD(T)-F12/CVTA-F12

=====  
 Geometry (MP2/AVTZ) 68

```

-----
                Z-MATRIX (ANGSTROMS AND DEGREES)
  CD  Cent  Atom  N1   Length/X    N2   Alpha/Y    N3   Beta/Z    J
-----
  1   1  C
  2   2  C    1  1.494811( 1)
  3   3  O    1  1.418868( 2)  2  113.187( 9)
  4   4  O    1  1.200026( 3)  2  127.142( 10)  3  180.503( 16)  0
  5   5  O    3  1.461663( 4)  1  103.795( 11)  2  90.000( 17)  0
  6   6  H    5  0.973170( 5)  3  101.738( 12)  1  45.000( 18)  0
  7   7  H    2  1.090996( 6)  1  107.832( 13)  3  90.000( 19)  0
  8   8  H    2  1.085994( 7)  1  109.779( 14)  7  117.290( 20)  0
  9   9  H    2  1.084700( 8)  1  110.550( 15)  7 -119.092( 21)  0
-----

```

-304.18110252 Energy CCSD(T)-F12/CVTA-F12

=====  
 Geometry (MP2/AVTZ) 69

```

-----
                Z-MATRIX (ANGSTROMS AND DEGREES)
  CD  Cent  Atom  N1   Length/X    N2   Alpha/Y    N3   Beta/Z    J
-----
  1   1  C
  2   2  C    1  1.491211( 1)
  3   3  O    1  1.420043( 2)  2  112.329( 9)
  4   4  O    1  1.199920( 3)  2  127.910( 10)  3  178.826( 16)  0
  5   5  O    3  1.461884( 4)  1  104.241( 11)  2  90.000( 17)  0
  6   6  H    5  0.973243( 5)  3  101.688( 12)  1  45.000( 18)  0
  7   7  H    2  1.084465( 6)  1  110.671( 13)  3  180.000( 19)  0
  8   8  H    2  1.089081( 7)  1  108.112( 14)  7  121.879( 20)  0
  9   9  H    2  1.088906( 8)  1  109.028( 15)  7 -121.890( 21)  0
-----

```

-304.18214082 Energy CCSD(T)-F12/CVTA-F12

=====  
 Geometry (MP2/AVTZ) 70

-----  
 Z-MATRIX (ANGSTROMS AND DEGREES)

| CD | Cent | Atom | N1 | Length/X     | N2 | Alpha/Y      | N3 | Beta/Z        | J |
|----|------|------|----|--------------|----|--------------|----|---------------|---|
| 1  | 1    | C    |    |              |    |              |    |               |   |
| 2  | 2    | C    | 1  | 1.495587( 1) |    |              |    |               |   |
| 3  | 3    | O    | 1  | 1.418277( 2) | 2  | 113.514( 9)  |    |               |   |
| 4  | 4    | O    | 1  | 1.200269( 3) | 2  | 126.816( 10) | 3  | 178.150( 16)  | 0 |
| 5  | 5    | O    | 3  | 1.462630( 4) | 1  | 104.314( 11) | 2  | 90.000( 17)   | 0 |
| 6  | 6    | H    | 5  | 0.973334( 5) | 3  | 101.587( 12) | 1  | 45.000( 18)   | 0 |
| 7  | 7    | H    | 2  | 1.090550( 6) | 1  | 107.429( 13) | 3  | 270.000( 19)  | 0 |
| 8  | 8    | H    | 2  | 1.084527( 7) | 1  | 111.112( 14) | 7  | 118.810( 20)  | 0 |
| 9  | 9    | H    | 2  | 1.085895( 8) | 1  | 109.720( 15) | 7  | -117.315( 21) | 0 |

-304.18071072 Energy CCSD(T)-F12/CVTA-F12

=====  
=====

Geometry (MP2/AVTZ) 71

Z-MATRIX (ANGSTROMS AND DEGREES)

| CD | Cent | Atom | N1 | Length/X     | N2 | Alpha/Y      | N3 | Beta/Z        | J |
|----|------|------|----|--------------|----|--------------|----|---------------|---|
| 1  | 1    | C    |    |              |    |              |    |               |   |
| 2  | 2    | C    | 1  | 1.498248( 1) |    |              |    |               |   |
| 3  | 3    | O    | 1  | 1.423455( 2) | 2  | 113.939( 9)  |    |               |   |
| 4  | 4    | O    | 1  | 1.198291( 3) | 2  | 126.343( 10) | 3  | 182.130( 16)  | 0 |
| 5  | 5    | O    | 3  | 1.461085( 4) | 1  | 101.314( 11) | 2  | 90.000( 17)   | 0 |
| 6  | 6    | H    | 5  | 0.970747( 5) | 3  | 99.375( 12)  | 1  | 90.000( 18)   | 0 |
| 7  | 7    | H    | 2  | 1.083384( 6) | 1  | 111.565( 13) | 3  | 0.000( 19)    | 0 |
| 8  | 8    | H    | 2  | 1.088359( 7) | 1  | 108.430( 14) | 7  | 121.726( 20)  | 0 |
| 9  | 9    | H    | 2  | 1.088301( 8) | 1  | 108.598( 15) | 7  | -121.586( 21) | 0 |

-304.18510391 Energy CCSD(T)-F12/CVTA-F12

=====  
=====

Geometry (MP2/AVTZ) 72

Z-MATRIX (ANGSTROMS AND DEGREES)

| CD | Cent | Atom | N1 | Length/X     | N2 | Alpha/Y      | N3 | Beta/Z        | J |
|----|------|------|----|--------------|----|--------------|----|---------------|---|
| 1  | 1    | C    |    |              |    |              |    |               |   |
| 2  | 2    | C    | 1  | 1.494095( 1) |    |              |    |               |   |
| 3  | 3    | O    | 1  | 1.424721( 2) | 2  | 112.853( 9)  |    |               |   |
| 4  | 4    | O    | 1  | 1.197923( 3) | 2  | 127.271( 10) | 3  | 183.056( 16)  | 0 |
| 5  | 5    | O    | 3  | 1.460107( 4) | 1  | 101.227( 11) | 2  | 90.000( 17)   | 0 |
| 6  | 6    | H    | 5  | 0.970688( 5) | 3  | 99.422( 12)  | 1  | 90.000( 18)   | 0 |
| 7  | 7    | H    | 2  | 1.090869( 6) | 1  | 107.616( 13) | 3  | 90.000( 19)   | 0 |
| 8  | 8    | H    | 2  | 1.085937( 7) | 1  | 109.709( 14) | 7  | 117.200( 20)  | 0 |
| 9  | 9    | H    | 2  | 1.084600( 8) | 1  | 110.900( 15) | 7  | -119.264( 21) | 0 |

-304.18646657 Energy CCSD(T)-F12/CVTA-F12

=====  
=====

Geometry (MP2/AVTZ) 73

Z-MATRIX (ANGSTROMS AND DEGREES)

| CD | Cent | Atom | N1 | Length/X | N2 | Alpha/Y | N3 | Beta/Z | J |
|----|------|------|----|----------|----|---------|----|--------|---|
| 1  | 1    | C    |    |          |    |         |    |        |   |

```

2  2 C   1  1.490270(  1)
3  3 O   1  1.425978(  2)  2 111.910(  9)
4  4 O   1  1.197779(  3)  2 128.176( 10)  3 181.831( 16)  0
5  5 O   3  1.459640(  4)  1 101.773( 11)  2  90.000( 17)  0
6  6 H   5  0.970659(  5)  3  99.549( 12)  1  90.000( 18)  0
7  7 H   2  1.084491(  6)  1 110.576( 13)  3 180.000( 19)  0
8  8 H   2  1.088796(  7)  1 108.559( 14)  7 121.976( 20)  0
9  9 H   2  1.089085(  8)  1 108.672( 15)  7 -121.522( 21)  0

```

-----  
-304.18761873 Energy CCSD(T)-F12/CVTA-F12  
=====

=====  
Geometry (MP2/AVTZ) 74  
-----

Z-MATRIX (ANGSTROMS AND DEGREES)

| CD | Cent | Atom | N1 | Length/X     | N2 | Alpha/Y      | N3 | Beta/Z        | J |
|----|------|------|----|--------------|----|--------------|----|---------------|---|
| 1  | 1    | C    |    |              |    |              |    |               |   |
| 2  | 2    | C    | 1  | 1.494373( 1) |    |              |    |               |   |
| 3  | 3    | O    | 1  | 1.424102( 2) | 2  | 113.091( 9)  |    |               |   |
| 4  | 4    | O    | 1  | 1.198243( 3) | 2  | 127.122( 10) | 3  | 180.776( 16)  | 0 |
| 5  | 5    | O    | 3  | 1.460569( 4) | 1  | 101.852( 11) | 2  | 90.000( 17)   | 0 |
| 6  | 6    | H    | 5  | 0.970718( 5) | 3  | 99.515( 12)  | 1  | 90.000( 18)   | 0 |
| 7  | 7    | H    | 2  | 1.090692( 6) | 1  | 107.481( 13) | 3  | 270.000( 19)  | 0 |
| 8  | 8    | H    | 2  | 1.084587( 7) | 1  | 111.093( 14) | 7  | 118.921( 20)  | 0 |
| 9  | 9    | H    | 2  | 1.085779( 8) | 1  | 109.583( 15) | 7  | -117.315( 21) | 0 |

-----  
-304.18620710 Energy CCSD(T)-F12/CVTA-F12  
=====

=====  
Geometry (MP2/AVTZ) 75  
-----

Z-MATRIX (ANGSTROMS AND DEGREES)

| CD | Cent | Atom | N1 | Length/X     | N2 | Alpha/Y      | N3 | Beta/Z        | J |
|----|------|------|----|--------------|----|--------------|----|---------------|---|
| 1  | 1    | C    |    |              |    |              |    |               |   |
| 2  | 2    | C    | 1  | 1.499394( 1) |    |              |    |               |   |
| 3  | 3    | O    | 1  | 1.424662( 2) | 2  | 113.568( 9)  |    |               |   |
| 4  | 4    | O    | 1  | 1.196178( 3) | 2  | 126.278( 10) | 3  | 183.730( 16)  | 0 |
| 5  | 5    | O    | 3  | 1.469824( 4) | 1  | 101.423( 11) | 2  | 90.000( 17)   | 0 |
| 6  | 6    | H    | 5  | 0.968101( 5) | 3  | 97.833( 12)  | 1  | 135.000( 18)  | 0 |
| 7  | 7    | H    | 2  | 1.083432( 6) | 1  | 111.619( 13) | 3  | 0.000( 19)    | 0 |
| 8  | 8    | H    | 2  | 1.088189( 7) | 1  | 108.434( 14) | 7  | 121.897( 20)  | 0 |
| 9  | 9    | H    | 2  | 1.088672( 8) | 1  | 108.579( 15) | 7  | -121.432( 21) | 0 |

-----  
-304.18263540 Energy CCSD(T)-F12/CVTA-F12  
=====

=====  
Geometry (MP2/AVTZ) 76  
-----

Z-MATRIX (ANGSTROMS AND DEGREES)

| CD | Cent | Atom | N1 | Length/X     | N2 | Alpha/Y      | N3 | Beta/Z       | J |
|----|------|------|----|--------------|----|--------------|----|--------------|---|
| 1  | 1    | C    |    |              |    |              |    |              |   |
| 2  | 2    | C    | 1  | 1.495293( 1) |    |              |    |              |   |
| 3  | 3    | O    | 1  | 1.426181( 2) | 2  | 112.455( 9)  |    |              |   |
| 4  | 4    | O    | 1  | 1.195703( 3) | 2  | 127.185( 10) | 3  | 184.627( 16) | 0 |



|   |   |   |   |              |   |              |   |               |   |
|---|---|---|---|--------------|---|--------------|---|---------------|---|
| 5 | 5 | O | 3 | 1.468913( 4) | 1 | 101.270( 11) | 2 | 90.000( 17)   | 0 |
| 6 | 6 | H | 5 | 0.968083( 5) | 3 | 97.892( 12)  | 1 | 135.000( 18)  | 0 |
| 7 | 7 | H | 2 | 1.090666( 6) | 1 | 107.577( 13) | 3 | 90.000( 19)   | 0 |
| 8 | 8 | H | 2 | 1.086123( 7) | 1 | 109.644( 14) | 7 | 117.110( 20)  | 0 |
| 9 | 9 | H | 2 | 1.084793( 8) | 1 | 111.037( 15) | 7 | -119.407( 21) | 0 |

-304.18401082 Energy CCSD(T)-F12/CVTA-F12

=====  
Geometry (MP2/AVTZ) 77

Z-MATRIX (ANGSTROMS AND DEGREES)

| CD | Cent | Atom | N1 | Length/X     | N2 | Alpha/Y      | N3 | Beta/Z        | J |
|----|------|------|----|--------------|----|--------------|----|---------------|---|
| 1  | 1    | C    |    |              |    |              |    |               |   |
| 2  | 2    | C    | 1  | 1.491086( 1) |    |              |    |               |   |
| 3  | 3    | O    | 1  | 1.427367( 2) | 2  | 111.466( 9)  |    |               |   |
| 4  | 4    | O    | 1  | 1.195686( 3) | 2  | 128.130( 10) | 3  | 183.658( 16)  | 0 |
| 5  | 5    | O    | 3  | 1.468891( 4) | 1  | 101.497( 11) | 2  | 90.000( 17)   | 0 |
| 6  | 6    | H    | 5  | 0.968110( 5) | 3  | 97.965( 12)  | 1  | 135.000( 18)  | 0 |
| 7  | 7    | H    | 2  | 1.084496( 6) | 1  | 110.563( 13) | 3  | 180.000( 19)  | 0 |
| 8  | 8    | H    | 2  | 1.089045( 7) | 1  | 108.858( 14) | 7  | 122.171( 20)  | 0 |
| 9  | 9    | H    | 2  | 1.089165( 8) | 1  | 108.443( 15) | 7  | -121.369( 21) | 0 |

-304.18522400 Energy CCSD(T)-F12/CVTA-F12

=====  
Geometry (MP2/AVTZ) 78

Z-MATRIX (ANGSTROMS AND DEGREES)

| CD | Cent | Atom | N1 | Length/X     | N2 | Alpha/Y      | N3 | Beta/Z        | J |
|----|------|------|----|--------------|----|--------------|----|---------------|---|
| 1  | 1    | C    |    |              |    |              |    |               |   |
| 2  | 2    | C    | 1  | 1.495084( 1) |    |              |    |               |   |
| 3  | 3    | O    | 1  | 1.425899( 2) | 2  | 112.636( 9)  |    |               |   |
| 4  | 4    | O    | 1  | 1.196083( 3) | 2  | 127.148( 10) | 3  | 182.486( 16)  | 0 |
| 5  | 5    | O    | 3  | 1.469365( 4) | 1  | 101.688( 11) | 2  | 90.000( 17)   | 0 |
| 6  | 6    | H    | 5  | 0.968098( 5) | 3  | 97.981( 12)  | 1  | 135.000( 18)  | 0 |
| 7  | 7    | H    | 2  | 1.091093( 6) | 1  | 107.666( 13) | 3  | 270.000( 19)  | 0 |
| 8  | 8    | H    | 2  | 1.084594( 7) | 1  | 111.001( 14) | 7  | 118.928( 20)  | 0 |
| 9  | 9    | H    | 2  | 1.085766( 8) | 1  | 109.548( 15) | 7  | -117.355( 21) | 0 |

-304.18381484 Energy CCSD(T)-F12/CVTA-F12

=====  
Geometry (MP2/AVTZ) 79

Z-MATRIX (ANGSTROMS AND DEGREES)

| CD | Cent | Atom | N1 | Length/X     | N2 | Alpha/Y      | N3 | Beta/Z       | J |
|----|------|------|----|--------------|----|--------------|----|--------------|---|
| 1  | 1    | C    |    |              |    |              |    |              |   |
| 2  | 2    | C    | 1  | 1.499848( 1) |    |              |    |              |   |
| 3  | 3    | O    | 1  | 1.423599( 2) | 2  | 113.742( 9)  |    |              |   |
| 4  | 4    | O    | 1  | 1.195605( 3) | 2  | 126.252( 10) | 3  | 184.219( 16) | 0 |
| 5  | 5    | O    | 3  | 1.474971( 4) | 1  | 100.904( 11) | 2  | 90.000( 17)  | 0 |
| 6  | 6    | H    | 5  | 0.968173( 5) | 3  | 97.324( 12)  | 1  | 180.000( 18) | 0 |
| 7  | 7    | H    | 2  | 1.083432( 6) | 1  | 111.637( 13) | 3  | 0.000( 19)   | 0 |

8 8 H 2 1.088214( 7) 1 108.255( 14) 7 121.721( 20) 0  
9 9 H 2 1.088530( 8) 1 108.772( 15) 7 -121.571( 21) 0

-----  
-304.18069286 Energy CCSD(T)-F12/CVTA-F12  
=====

=====  
Geometry (MP2/AVTZ) 80  
-----

Z-MATRIX (ANGSTROMS AND DEGREES)  
CD Cent Atom N1 Length/X N2 Alpha/Y N3 Beta/Z J  
-----  
1 1 C  
2 2 C 1 1.495837( 1)  
3 3 O 1 1.425130( 2) 2 112.641( 9)  
4 4 O 1 1.195145( 3) 2 127.165( 10) 3 185.173( 16) 0  
5 5 O 3 1.473511( 4) 1 100.975( 11) 2 90.000( 17) 0  
6 6 H 5 0.968148( 5) 3 97.411( 12) 1 180.000( 18) 0  
7 7 H 2 1.090642( 6) 1 107.480( 13) 3 90.000( 19) 0  
8 8 H 2 1.086145( 7) 1 109.712( 14) 7 117.122( 20) 0  
9 9 H 2 1.084584( 8) 1 111.039( 15) 7 -119.456( 21) 0  
-----

-----  
-304.18208192 Energy CCSD(T)-F12/CVTA-F12  
=====

=====  
Geometry (MP2/AVTZ) 81  
-----

Z-MATRIX (ANGSTROMS AND DEGREES)  
CD Cent Atom N1 Length/X N2 Alpha/Y N3 Beta/Z J  
-----  
1 1 C  
2 2 C 1 1.492051( 1)  
3 3 O 1 1.426539( 2) 2 111.722( 9)  
4 4 O 1 1.195070( 3) 2 128.070( 10) 3 184.193( 16) 0  
5 5 O 3 1.473837( 4) 1 101.292( 11) 2 90.000( 17) 0  
6 6 H 5 0.968090( 5) 3 97.419( 12) 1 180.000( 18) 0  
7 7 H 2 1.084542( 6) 1 110.502( 13) 3 180.000( 19) 0  
8 8 H 2 1.088555( 7) 1 108.973( 14) 7 122.250( 20) 0  
9 9 H 2 1.089233( 8) 1 108.373( 15) 7 -121.077( 21) 0  
-----

-----  
-304.18312408 Energy CCSD(T)-F12/CVTA-F12  
=====

=====  
Geometry (MP2/AVTZ) 82  
-----

Z-MATRIX (ANGSTROMS AND DEGREES)  
CD Cent Atom N1 Length/X N2 Alpha/Y N3 Beta/Z J  
-----  
1 1 C  
2 2 C 1 1.496003( 1)  
3 3 O 1 1.424692( 2) 2 112.914( 9)  
4 4 O 1 1.195580( 3) 2 127.044( 10) 3 182.978( 16) 0  
5 5 O 3 1.475282( 4) 1 101.208( 11) 2 90.000( 17) 0  
6 6 H 5 0.968106( 5) 3 97.341( 12) 1 180.000( 18) 0  
7 7 H 2 1.090745( 6) 1 107.891( 13) 3 270.000( 19) 0  
8 8 H 2 1.084680( 7) 1 110.992( 14) 7 119.046( 20) 0  
9 9 H 2 1.085736( 8) 1 109.396( 15) 7 -117.463( 21) 0  
-----

-304.18169855 Energy CCSD(T)-F12/CVTA-F12

=====  
Geometry (MP2/AVTZ) 83

Z-MATRIX (ANGSTROMS AND DEGREES)

| CD | Cent | Atom | N1 | Length/X     | N2 | Alpha/Y      | N3 | Beta/Z        | J |
|----|------|------|----|--------------|----|--------------|----|---------------|---|
| 1  | 1    | C    |    |              |    |              |    |               |   |
| 2  | 2    | C    | 1  | 1.500612( 1) |    |              |    |               |   |
| 3  | 3    | O    | 1  | 1.424044( 2) | 2  | 114.074( 9)  |    |               |   |
| 4  | 4    | O    | 1  | 1.195573( 3) | 2  | 126.019( 10) | 3  | 184.604( 16)  | 0 |
| 5  | 5    | O    | 3  | 1.468402( 4) | 1  | 100.663( 11) | 2  | 90.000( 17)   | 0 |
| 6  | 6    | H    | 5  | 0.968866( 5) | 3  | 98.636( 12)  | 1  | 225.000( 18)  | 0 |
| 7  | 7    | H    | 2  | 1.083791( 6) | 1  | 111.894( 13) | 3  | 0.000( 19)    | 0 |
| 8  | 8    | H    | 2  | 1.088242( 7) | 1  | 108.013( 14) | 7  | 121.255( 20)  | 0 |
| 9  | 9    | H    | 2  | 1.088213( 8) | 1  | 109.016( 15) | 7  | -122.022( 21) | 0 |

-304.18201058 Energy CCSD(T)-F12/CVTA-F12

=====  
Geometry (MP2/AVTZ) 84

Z-MATRIX (ANGSTROMS AND DEGREES)

| CD | Cent | Atom | N1 | Length/X     | N2 | Alpha/Y      | N3 | Beta/Z        | J |
|----|------|------|----|--------------|----|--------------|----|---------------|---|
| 1  | 1    | C    |    |              |    |              |    |               |   |
| 2  | 2    | C    | 1  | 1.496598( 1) |    |              |    |               |   |
| 3  | 3    | O    | 1  | 1.425417( 2) | 2  | 113.109( 9)  |    |               |   |
| 4  | 4    | O    | 1  | 1.195229( 3) | 2  | 126.823( 10) | 3  | 185.709( 16)  | 0 |
| 5  | 5    | O    | 3  | 1.466669( 4) | 1  | 100.945( 11) | 2  | 90.000( 17)   | 0 |
| 6  | 6    | H    | 5  | 0.968804( 5) | 3  | 98.767( 12)  | 1  | 225.000( 18)  | 0 |
| 7  | 7    | H    | 2  | 1.090564( 6) | 1  | 107.345( 13) | 3  | 90.000( 19)   | 0 |
| 8  | 8    | H    | 2  | 1.086062( 7) | 1  | 109.756( 14) | 7  | 117.164( 20)  | 0 |
| 9  | 9    | H    | 2  | 1.084568( 8) | 1  | 111.487( 15) | 7  | -119.437( 21) | 0 |

-304.18329668 Energy CCSD(T)-F12/CVTA-F12

=====  
Geometry (MP2/AVTZ) 85

Z-MATRIX (ANGSTROMS AND DEGREES)

| CD | Cent | Atom | N1 | Length/X     | N2 | Alpha/Y      | N3 | Beta/Z        | J |
|----|------|------|----|--------------|----|--------------|----|---------------|---|
| 1  | 1    | C    |    |              |    |              |    |               |   |
| 2  | 2    | C    | 1  | 1.493386( 1) |    |              |    |               |   |
| 3  | 3    | O    | 1  | 1.426780( 2) | 2  | 112.216( 9)  |    |               |   |
| 4  | 4    | O    | 1  | 1.195123( 3) | 2  | 127.746( 10) | 3  | 184.804( 16)  | 0 |
| 5  | 5    | O    | 3  | 1.466777( 4) | 1  | 101.526( 11) | 2  | 90.000( 17)   | 0 |
| 6  | 6    | H    | 5  | 0.968674( 5) | 3  | 98.603( 12)  | 1  | 225.000( 18)  | 0 |
| 7  | 7    | H    | 2  | 1.084578( 6) | 1  | 110.341( 13) | 3  | 180.000( 19)  | 0 |
| 8  | 8    | H    | 2  | 1.088209( 7) | 1  | 109.395( 14) | 7  | 121.929( 20)  | 0 |
| 9  | 9    | H    | 2  | 1.089259( 8) | 1  | 108.382( 15) | 7  | -120.850( 21) | 0 |

-304.18420564 Energy CCSD(T)-F12/CVTA-F12

=====  
=====

Geometry (MP2/AVTZ) 86

```

-----
                Z-MATRIX (ANGSTROMS AND DEGREES)
  CD  Cent  Atom  N1   Length/X   N2   Alpha/Y   N3   Beta/Z   J
-----
  1   1  C
  2   2  C   1  1.497355( 1)
  3   3  O   1  1.425082( 2)  2  113.288( 9)
  4   4  O   1  1.195567( 3)  2  126.819( 10)  3  183.479( 16)  0
  5   5  O   3  1.468881( 4)  1  101.219( 11)  2  90.000( 17)  0
  6   6  H   5  0.968722( 5)  3  98.492( 12)  1  225.000( 18)  0
  7   7  H   2  1.090315( 6)  1  108.238( 13)  3  270.000( 19)  0
  8   8  H   2  1.085096( 7)  1  111.027( 14)  7  119.524( 20)  0
  9   9  H   2  1.085709( 8)  1  109.212( 15)  7 -117.472( 21)  0
-----

```

-304.18288432 Energy CCSD(T)-F12/CVTA-F12

=====  
 Geometry (MP2/AVTZ) 87

```

-----
                Z-MATRIX (ANGSTROMS AND DEGREES)
  CD  Cent  Atom  N1   Length/X   N2   Alpha/Y   N3   Beta/Z   J
-----
  1   1  C
  2   2  C   1  1.503138( 1)
  3   3  O   1  1.423185( 2)  2  113.939( 9)
  4   4  O   1  1.195624( 3)  2  125.647( 10)  3  184.728( 16)  0
  5   5  O   3  1.459444( 4)  1  102.494( 11)  2  90.000( 17)  0
  6   6  H   5  0.970945( 5)  3  100.844( 12)  1  270.000( 18)  0
  7   7  H   2  1.084966( 6)  1  112.192( 13)  3  0.000( 19)  0
  8   8  H   2  1.088249( 7)  1  107.844( 14)  7  120.578( 20)  0
  9   9  H   2  1.088337( 8)  1  109.321( 15)  7 -122.815( 21)  0
-----

```

-304.18095542 Energy CCSD(T)-F12/CVTA-F12

=====  
 Geometry (MP2/AVTZ) 88

```

-----
                Z-MATRIX (ANGSTROMS AND DEGREES)
  CD  Cent  Atom  N1   Length/X   N2   Alpha/Y   N3   Beta/Z   J
-----
  1   1  C
  2   2  C   1  1.499309( 1)
  3   3  O   1  1.423336( 2)  2  113.219( 9)
  4   4  O   1  1.195515( 3)  2  126.196( 10)  3  186.039( 16)  0
  5   5  O   3  1.457944( 4)  1  102.753( 11)  2  90.000( 17)  0
  6   6  H   5  0.970641( 5)  3  100.999( 12)  1  270.000( 18)  0
  7   7  H   2  1.090627( 6)  1  107.055( 13)  3  90.000( 19)  0
  8   8  H   2  1.085798( 7)  1  109.909( 14)  7  117.254( 20)  0
  9   9  H   2  1.085824( 8)  1  112.396( 15)  7 -118.744( 21)  0
-----

```

-304.18203121 Energy CCSD(T)-F12/CVTA-F12

=====  
 Geometry (MP2/AVTZ) 89

-----  
 Z-MATRIX (ANGSTROMS AND DEGREES)

| CD | Cent | Atom | N1 | Length/X     | N2 | Alpha/Y      | N3 | Beta/Z        | J |
|----|------|------|----|--------------|----|--------------|----|---------------|---|
| 1  | 1    | C    |    |              |    |              |    |               |   |
| 2  | 2    | C    | 1  | 1.496296( 1) |    |              |    |               |   |
| 3  | 3    | O    | 1  | 1.425553( 2) | 2  | 112.412( 9)  |    |               |   |
| 4  | 4    | O    | 1  | 1.195368( 3) | 2  | 127.131( 10) | 3  | 185.304( 16)  | 0 |
| 5  | 5    | O    | 3  | 1.457455( 4) | 1  | 103.558( 11) | 2  | 90.000( 17)   | 0 |
| 6  | 6    | H    | 5  | 0.970110( 5) | 3  | 100.806( 12) | 1  | 270.000( 18)  | 0 |
| 7  | 7    | H    | 2  | 1.084564( 6) | 1  | 110.186( 13) | 3  | 180.000( 19)  | 0 |
| 8  | 8    | H    | 2  | 1.088947( 7) | 1  | 110.486( 14) | 7  | 121.661( 20)  | 0 |
| 9  | 9    | H    | 2  | 1.089281( 8) | 1  | 108.312( 15) | 7  | -120.750( 21) | 0 |

-304.18279675 Energy CCSD(T)-F12/CVTA-F12

=====  
=====

Geometry (MP2/AVTZ) 90

Z-MATRIX (ANGSTROMS AND DEGREES)

| CD | Cent | Atom | N1 | Length/X     | N2 | Alpha/Y      | N3 | Beta/Z        | J |
|----|------|------|----|--------------|----|--------------|----|---------------|---|
| 1  | 1    | C    |    |              |    |              |    |               |   |
| 2  | 2    | C    | 1  | 1.499955( 1) |    |              |    |               |   |
| 3  | 3    | O    | 1  | 1.424706( 2) | 2  | 113.179( 9)  |    |               |   |
| 4  | 4    | O    | 1  | 1.195630( 3) | 2  | 126.487( 10) | 3  | 183.775( 16)  | 0 |
| 5  | 5    | O    | 3  | 1.459642( 4) | 1  | 103.224( 11) | 2  | 90.000( 17)   | 0 |
| 6  | 6    | H    | 5  | 0.970409( 5) | 3  | 100.682( 12) | 1  | 270.000( 18)  | 0 |
| 7  | 7    | H    | 2  | 1.091023( 6) | 1  | 108.771( 13) | 3  | 270.000( 19)  | 0 |
| 8  | 8    | H    | 2  | 1.085642( 7) | 1  | 110.989( 14) | 7  | 120.071( 20)  | 0 |
| 9  | 9    | H    | 2  | 1.085633( 8) | 1  | 109.157( 15) | 7  | -117.197( 21) | 0 |

-304.18173355 Energy CCSD(T)-F12/CVTA-F12

=====  
=====

Geometry (MP2/AVTZ) 91

Z-MATRIX (ANGSTROMS AND DEGREES)

| CD | Cent | Atom | N1 | Length/X     | N2 | Alpha/Y      | N3 | Beta/Z        | J |
|----|------|------|----|--------------|----|--------------|----|---------------|---|
| 1  | 1    | C    |    |              |    |              |    |               |   |
| 2  | 2    | C    | 1  | 1.505861( 1) |    |              |    |               |   |
| 3  | 3    | O    | 1  | 1.418288( 2) | 2  | 113.549( 9)  |    |               |   |
| 4  | 4    | O    | 1  | 1.196647( 3) | 2  | 125.525( 10) | 3  | 184.268( 16)  | 0 |
| 5  | 5    | O    | 3  | 1.462184( 4) | 1  | 105.838( 11) | 2  | 90.000( 17)   | 0 |
| 6  | 6    | H    | 5  | 0.972763( 5) | 3  | 103.127( 12) | 1  | 315.000( 18)  | 0 |
| 7  | 7    | H    | 2  | 1.084861( 6) | 1  | 111.995( 13) | 3  | 0.000( 19)    | 0 |
| 8  | 8    | H    | 2  | 1.088497( 7) | 1  | 107.608( 14) | 7  | 120.262( 20)  | 0 |
| 9  | 9    | H    | 2  | 1.088895( 8) | 1  | 109.711( 15) | 7  | -123.538( 21) | 0 |

-304.17455093 Energy CCSD(T)-F12/CVTA-F12

=====  
=====

Geometry (MP2/AVTZ) 92

Z-MATRIX (ANGSTROMS AND DEGREES)

| CD | Cent | Atom | N1 | Length/X | N2 | Alpha/Y | N3 | Beta/Z | J |
|----|------|------|----|----------|----|---------|----|--------|---|
| 1  | 1    | C    |    |          |    |         |    |        |   |

```

2  2 C   1  1.501787(  1)
3  3 O   1  1.418512(  2)  2 112.672(  9)
4  4 O   1  1.196355(  3)  2 126.170( 10)  3 185.495( 16)  0
5  5 O   3  1.460866(  4)  1 105.779( 11)  2  90.000( 17)  0
6  6 H   5  0.972862(  5)  3 103.136( 12)  1 315.000( 18)  0
7  7 H   2  1.090634(  6)  1 106.839( 13)  3  90.000( 19)  0
8  8 H   2  1.085976(  7)  1 110.170( 14)  7 117.169( 20)  0
9  9 H   2  1.086754(  8)  1 112.311( 15)  7 -118.067( 21)  0

```

-----  
-304.17584456 Energy CCSD(T)-F12/CVTA-F12  
=====

=====  
Geometry (MP2/AVTZ) 93  
-----

Z-MATRIX (ANGSTROMS AND DEGREES)

| CD | Cent | Atom | N1 | Length/X     | N2 | Alpha/Y      | N3 | Beta/Z        | J |
|----|------|------|----|--------------|----|--------------|----|---------------|---|
| 1  | 1    | C    |    |              |    |              |    |               |   |
| 2  | 2    | C    | 1  | 1.498813( 1) |    |              |    |               |   |
| 3  | 3    | O    | 1  | 1.419944( 2) | 2  | 112.074( 9)  |    |               |   |
| 4  | 4    | O    | 1  | 1.196432( 3) | 2  | 126.876( 10) | 3  | 185.093( 16)  | 0 |
| 5  | 5    | O    | 3  | 1.460738( 4) | 1  | 106.537( 11) | 2  | 90.000( 17)   | 0 |
| 6  | 6    | H    | 5  | 0.971723( 5) | 3  | 103.101( 12) | 1  | 315.000( 18)  | 0 |
| 7  | 7    | H    | 2  | 1.084453( 6) | 1  | 110.277( 13) | 3  | 180.000( 19)  | 0 |
| 8  | 8    | H    | 2  | 1.089883( 7) | 1  | 111.321( 14) | 7  | 122.683( 20)  | 0 |
| 9  | 9    | H    | 2  | 1.089390( 8) | 1  | 107.863( 15) | 7  | -120.531( 21) | 0 |

-----  
-304.17640237 Energy CCSD(T)-F12/CVTA-F12  
=====

=====  
Geometry (MP2/AVTZ) 94  
-----

Z-MATRIX (ANGSTROMS AND DEGREES)

| CD | Cent | Atom | N1 | Length/X     | N2 | Alpha/Y      | N3 | Beta/Z        | J |
|----|------|------|----|--------------|----|--------------|----|---------------|---|
| 1  | 1    | C    |    |              |    |              |    |               |   |
| 2  | 2    | C    | 1  | 1.502666( 1) |    |              |    |               |   |
| 3  | 3    | O    | 1  | 1.419744( 2) | 2  | 112.906( 9)  |    |               |   |
| 4  | 4    | O    | 1  | 1.196699( 3) | 2  | 126.246( 10) | 3  | 183.479( 16)  | 0 |
| 5  | 5    | O    | 3  | 1.462387( 4) | 1  | 106.537( 11) | 2  | 90.000( 17)   | 0 |
| 6  | 6    | H    | 5  | 0.971678( 5) | 3  | 103.031( 12) | 1  | 315.000( 18)  | 0 |
| 7  | 7    | H    | 2  | 1.091976( 6) | 1  | 109.458( 13) | 3  | 270.000( 19)  | 0 |
| 8  | 8    | H    | 2  | 1.085170( 7) | 1  | 110.817( 14) | 7  | 120.089( 20)  | 0 |
| 9  | 9    | H    | 2  | 1.085729( 8) | 1  | 109.040( 15) | 7  | -116.978( 21) | 0 |

-----  
-304.17517832 Energy CCSD(T)-F12/CVTA-F12  
=====

=====  
Geometry (MP2/AVTZ) 95  
-----

Z-MATRIX (ANGSTROMS AND DEGREES)

| CD | Cent | Atom | N1 | Length/X     | N2 | Alpha/Y      | N3 | Beta/Z       | J |
|----|------|------|----|--------------|----|--------------|----|--------------|---|
| 1  | 1    | C    |    |              |    |              |    |              |   |
| 2  | 2    | C    | 1  | 1.508027( 1) |    |              |    |              |   |
| 3  | 3    | O    | 1  | 1.381618( 2) | 2  | 117.168( 9)  |    |              |   |
| 4  | 4    | O    | 1  | 1.201923( 3) | 2  | 124.481( 10) | 3  | 190.696( 16) | 0 |

|   |   |   |   |              |   |              |   |               |   |
|---|---|---|---|--------------|---|--------------|---|---------------|---|
| 5 | 5 | O | 3 | 1.459015( 4) | 1 | 113.480( 11) | 2 | 45.000( 17)   | 0 |
| 6 | 6 | H | 5 | 0.970098( 5) | 3 | 103.924( 12) | 1 | 0.000( 18)    | 0 |
| 7 | 7 | H | 2 | 1.086023( 6) | 1 | 113.629( 13) | 3 | 0.000( 19)    | 0 |
| 8 | 8 | H | 2 | 1.087236( 7) | 1 | 105.807( 14) | 7 | 119.783( 20)  | 0 |
| 9 | 9 | H | 2 | 1.088819( 8) | 1 | 110.293( 15) | 7 | -124.287( 21) | 0 |

-304.18277253 Energy CCSD(T)-F12/CVTA-F12

Geometry (MP2/AVTZ) 96

Z-MATRIX (ANGSTROMS AND DEGREES)

| CD | Cent | Atom | N1 | Length/X     | N2 | Alpha/Y      | N3 | Beta/Z        | J |
|----|------|------|----|--------------|----|--------------|----|---------------|---|
| 1  | 1    | C    |    |              |    |              |    |               |   |
| 2  | 2    | C    | 1  | 1.506811( 1) |    |              |    |               |   |
| 3  | 3    | O    | 1  | 1.382158( 2) | 2  | 117.868( 9)  |    |               |   |
| 4  | 4    | O    | 1  | 1.201929( 3) | 2  | 123.939( 10) | 3  | 192.284( 16)  | 0 |
| 5  | 5    | O    | 3  | 1.458716( 4) | 1  | 114.532( 11) | 2  | 45.000( 17)   | 0 |
| 6  | 6    | H    | 5  | 0.969127( 5) | 3  | 103.773( 12) | 1  | 0.000( 18)    | 0 |
| 7  | 7    | H    | 2  | 1.089920( 6) | 1  | 105.224( 13) | 3  | 90.000( 19)   | 0 |
| 8  | 8    | H    | 2  | 1.085135( 7) | 1  | 109.220( 14) | 7  | 116.559( 20)  | 0 |
| 9  | 9    | H    | 2  | 1.086193( 8) | 1  | 116.025( 15) | 7  | -118.024( 21) | 0 |

-304.18221895 Energy CCSD(T)-F12/CVTA-F12

Geometry (MP2/AVTZ) 97

Z-MATRIX (ANGSTROMS AND DEGREES)

| CD | Cent | Atom | N1 | Length/X     | N2 | Alpha/Y      | N3 | Beta/Z        | J |
|----|------|------|----|--------------|----|--------------|----|---------------|---|
| 1  | 1    | C    |    |              |    |              |    |               |   |
| 2  | 2    | C    | 1  | 1.506453( 1) |    |              |    |               |   |
| 3  | 3    | O    | 1  | 1.383020( 2) | 2  | 117.072( 9)  |    |               |   |
| 4  | 4    | O    | 1  | 1.202126( 3) | 2  | 124.743( 10) | 3  | 192.490( 16)  | 0 |
| 5  | 5    | O    | 3  | 1.459229( 4) | 1  | 114.380( 11) | 2  | 45.000( 17)   | 0 |
| 6  | 6    | H    | 5  | 0.968657( 5) | 3  | 103.888( 12) | 1  | 0.000( 18)    | 0 |
| 7  | 7    | H    | 2  | 1.084362( 6) | 1  | 107.917( 13) | 3  | 180.000( 19)  | 0 |
| 8  | 8    | H    | 2  | 1.089337( 7) | 1  | 114.933( 14) | 7  | 120.598( 20)  | 0 |
| 9  | 9    | H    | 2  | 1.088555( 8) | 1  | 107.658( 15) | 7  | -119.551( 21) | 0 |

-304.18257549 Energy CCSD(T)-F12/CVTA-F12

Geometry (MP2/AVTZ) 98

Z-MATRIX (ANGSTROMS AND DEGREES)

| CD | Cent | Atom | N1 | Length/X     | N2 | Alpha/Y      | N3 | Beta/Z       | J |
|----|------|------|----|--------------|----|--------------|----|--------------|---|
| 1  | 1    | C    |    |              |    |              |    |              |   |
| 2  | 2    | C    | 1  | 1.507745( 1) |    |              |    |              |   |
| 3  | 3    | O    | 1  | 1.381510( 2) | 2  | 116.219( 9)  |    |              |   |
| 4  | 4    | O    | 1  | 1.202199( 3) | 2  | 125.330( 10) | 3  | 190.848( 16) | 0 |
| 5  | 5    | O    | 3  | 1.459506( 4) | 1  | 113.092( 11) | 2  | 45.000( 17)  | 0 |
| 6  | 6    | H    | 5  | 0.969735( 5) | 3  | 103.977( 12) | 1  | 0.000( 18)   | 0 |
| 7  | 7    | H    | 2  | 1.091678( 6) | 1  | 111.976( 13) | 3  | 270.000( 19) | 0 |

8 8 H 2 1.087012( 7) 1 110.424( 14) 7 121.394( 20) 0  
9 9 H 2 1.084705( 8) 1 107.209( 15) 7 -117.597( 21) 0

-----  
-304.18331272 Energy CCSD(T)-F12/CVTA-F12  
=====

=====  
Geometry (MP2/AVTZ) 99  
-----

Z-MATRIX (ANGSTROMS AND DEGREES)  
CD Cent Atom N1 Length/X N2 Alpha/Y N3 Beta/Z J  
-----  
1 1 C  
2 2 C 1 1.503378( 1)  
3 3 O 1 1.390659( 2) 2 116.574( 9)  
4 4 O 1 1.201801( 3) 2 125.627( 10) 3 189.382( 16) 0  
5 5 O 3 1.456469( 4) 1 111.010( 11) 2 45.000( 17) 0  
6 6 H 5 0.970023( 5) 3 102.220( 12) 1 45.000( 18) 0  
7 7 H 2 1.083512( 6) 1 112.280( 13) 3 0.000( 19) 0  
8 8 H 2 1.087678( 7) 1 106.154( 14) 7 121.012( 20) 0  
9 9 H 2 1.088701( 8) 1 110.142( 15) 7 -122.980( 21) 0  
-----

-----  
-304.18784429 Energy CCSD(T)-F12/CVTA-F12  
=====

=====  
Geometry (MP2/AVTZ) 100  
-----

Z-MATRIX (ANGSTROMS AND DEGREES)  
CD Cent Atom N1 Length/X N2 Alpha/Y N3 Beta/Z J  
-----  
1 1 C  
2 2 C 1 1.501277( 1)  
3 3 O 1 1.391605( 2) 2 116.828( 9)  
4 4 O 1 1.201839( 3) 2 125.522( 10) 3 190.675( 16) 0  
5 5 O 3 1.456540( 4) 1 112.056( 11) 2 45.000( 17) 0  
6 6 H 5 0.969939( 5) 3 102.138( 12) 1 45.000( 18) 0  
7 7 H 2 1.090090( 6) 1 105.607( 13) 3 90.000( 19) 0  
8 8 H 2 1.085573( 7) 1 109.480( 14) 7 116.576( 20) 0  
9 9 H 2 1.083722( 8) 1 113.436( 15) 7 -118.420( 21) 0  
-----

-----  
-304.18775033 Energy CCSD(T)-F12/CVTA-F12  
=====

=====  
Geometry (MP2/AVTZ) 101  
-----

Z-MATRIX (ANGSTROMS AND DEGREES)  
CD Cent Atom N1 Length/X N2 Alpha/Y N3 Beta/Z J  
-----  
1 1 C  
2 2 C 1 1.500999( 1)  
3 3 O 1 1.391771( 2) 2 116.294( 9)  
4 4 O 1 1.201937( 3) 2 126.030( 10) 3 190.772( 16) 0  
5 5 O 3 1.457116( 4) 1 111.756( 11) 2 45.000( 17) 0  
6 6 H 5 0.969743( 5) 3 102.121( 12) 1 45.000( 18) 0  
7 7 H 2 1.084273( 6) 1 108.553( 13) 3 180.000( 19) 0  
8 8 H 2 1.086032( 7) 1 113.193( 14) 7 122.721( 20) 0  
9 9 H 2 1.089139( 8) 1 107.255( 15) 7 -119.288( 21) 0  
-----



-304.18788649 Energy CCSD(T)-F12/CVTA-F12

=====  
Geometry (MP2/AVTZ) 102

Z-MATRIX (ANGSTROMS AND DEGREES)

| CD | Cent | Atom | N1 | Length/X     | N2 | Alpha/Y      | N3 | Beta/Z        | J |
|----|------|------|----|--------------|----|--------------|----|---------------|---|
| 1  | 1    | C    |    |              |    |              |    |               |   |
| 2  | 2    | C    | 1  | 1.502849( 1) |    |              |    |               |   |
| 3  | 3    | O    | 1  | 1.390982( 2) | 2  | 115.863( 9)  |    |               |   |
| 4  | 4    | O    | 1  | 1.201829( 3) | 2  | 126.242( 10) | 3  | 189.267( 16)  | 0 |
| 5  | 5    | O    | 3  | 1.457222( 4) | 1  | 110.536( 11) | 2  | 45.000( 17)   | 0 |
| 6  | 6    | H    | 5  | 0.969786( 5) | 3  | 102.214( 12) | 1  | 45.000( 18)   | 0 |
| 7  | 7    | H    | 2  | 1.089623( 6) | 1  | 111.324( 13) | 3  | 270.000( 19)  | 0 |
| 8  | 8    | H    | 2  | 1.085567( 7) | 1  | 110.175( 14) | 7  | 119.856( 20)  | 0 |
| 9  | 9    | H    | 2  | 1.085149( 8) | 1  | 107.483( 15) | 7  | -118.316( 21) | 0 |

=====  
-304.18814319 Energy CCSD(T)-F12/CVTA-F12

=====  
Geometry (MP2/AVTZ) 103

Z-MATRIX (ANGSTROMS AND DEGREES)

| CD | Cent | Atom | N1 | Length/X     | N2 | Alpha/Y      | N3 | Beta/Z        | J |
|----|------|------|----|--------------|----|--------------|----|---------------|---|
| 1  | 1    | C    |    |              |    |              |    |               |   |
| 2  | 2    | C    | 1  | 1.500261( 1) |    |              |    |               |   |
| 3  | 3    | O    | 1  | 1.395440( 2) | 2  | 116.540( 9)  |    |               |   |
| 4  | 4    | O    | 1  | 1.201449( 3) | 2  | 125.816( 10) | 3  | 189.576( 16)  | 0 |
| 5  | 5    | O    | 3  | 1.454689( 4) | 1  | 108.730( 11) | 2  | 45.000( 17)   | 0 |
| 6  | 6    | H    | 5  | 0.969432( 5) | 3  | 99.304( 12)  | 1  | 90.000( 18)   | 0 |
| 7  | 7    | H    | 2  | 1.082694( 6) | 1  | 112.356( 13) | 3  | 0.000( 19)    | 0 |
| 8  | 8    | H    | 2  | 1.087732( 7) | 1  | 106.450( 14) | 7  | 121.657( 20)  | 0 |
| 9  | 9    | H    | 2  | 1.088195( 8) | 1  | 109.666( 15) | 7  | -122.068( 21) | 0 |

=====  
-304.19386043 Energy CCSD(T)-F12/CVTA-F12

=====  
Geometry (MP2/AVTZ) 104

Z-MATRIX (ANGSTROMS AND DEGREES)

| CD | Cent | Atom | N1 | Length/X     | N2 | Alpha/Y      | N3 | Beta/Z        | J |
|----|------|------|----|--------------|----|--------------|----|---------------|---|
| 1  | 1    | C    |    |              |    |              |    |               |   |
| 2  | 2    | C    | 1  | 1.497984( 1) |    |              |    |               |   |
| 3  | 3    | O    | 1  | 1.396823( 2) | 2  | 116.632( 9)  |    |               |   |
| 4  | 4    | O    | 1  | 1.201509( 3) | 2  | 125.928( 10) | 3  | 190.865( 16)  | 0 |
| 5  | 5    | O    | 3  | 1.453750( 4) | 1  | 110.016( 11) | 2  | 45.000( 17)   | 0 |
| 6  | 6    | H    | 5  | 0.969369( 5) | 3  | 99.356( 12)  | 1  | 90.000( 18)   | 0 |
| 7  | 7    | H    | 2  | 1.090170( 6) | 1  | 105.962( 13) | 3  | 90.000( 19)   | 0 |
| 8  | 8    | H    | 2  | 1.085634( 7) | 1  | 109.218( 14) | 7  | 116.464( 20)  | 0 |
| 9  | 9    | H    | 2  | 1.082715( 8) | 1  | 112.836( 15) | 7  | -119.331( 21) | 0 |

=====  
-304.19393806 Energy CCSD(T)-F12/CVTA-F12

=====

Geometry (MP2/AVTZ) 105

```

-----
                Z-MATRIX (ANGSTROMS AND DEGREES)
  CD  Cent  Atom  N1   Length/X    N2   Alpha/Y    N3   Beta/Z    J
-----
  1   1  C
  2   2  C    1  1.497167( 1)
  3   3  O    1  1.397464( 2)  2  115.990( 9)
  4   4  O    1  1.201588( 3)  2  126.540( 10)  3  190.723( 16)  0
  5   5  O    3  1.454701( 4)  1  109.726( 11)  2  45.000( 17)  0
  6   6  H    5  0.969386( 5)  3  99.304( 12)  1  90.000( 18)  0
  7   7  H    2  1.084289( 6)  1  108.704( 13)  3  180.000( 19)  0
  8   8  H    2  1.085115( 7)  1  111.962( 14)  7  122.744( 20)  0
  9   9  H    2  1.089285( 8)  1  107.484( 15)  7 -119.274( 21)  0
-----

```

-304.19427585 Energy CCSD(T)-F12/CVTA-F12

=====  
 Geometry (MP2/AVTZ) 106

```

-----
                Z-MATRIX (ANGSTROMS AND DEGREES)
  CD  Cent  Atom  N1   Length/X    N2   Alpha/Y    N3   Beta/Z    J
-----
  1   1  C
  2   2  C    1  1.499320( 1)
  3   3  O    1  1.396454( 2)  2  115.722( 9)
  4   4  O    1  1.201331( 3)  2  126.564( 10)  3  189.311( 16)  0
  5   5  O    3  1.455537( 4)  1  108.174( 11)  2  45.000( 17)  0
  6   6  H    5  0.969428( 5)  3  99.228( 12)  1  90.000( 18)  0
  7   7  H    2  1.088383( 6)  1  110.467( 13)  3  270.000( 19)  0
  8   8  H    2  1.085489( 7)  1  110.378( 14)  7  119.396( 20)  0
  9   9  H    2  1.085235( 8)  1  107.686( 15)  7 -118.718( 21)  0
-----

```

-304.19432017 Energy CCSD(T)-F12/CVTA-F12

=====  
 Geometry (MP2/AVTZ) 107

```

-----
                Z-MATRIX (ANGSTROMS AND DEGREES)
  CD  Cent  Atom  N1   Length/X    N2   Alpha/Y    N3   Beta/Z    J
-----
  1   1  C
  2   2  C    1  1.499950( 1)
  3   3  O    1  1.391400( 2)  2  116.231( 9)
  4   4  O    1  1.201074( 3)  2  125.864( 10)  3  190.614( 16)  0
  5   5  O    3  1.465245( 4)  1  107.128( 11)  2  45.000( 17)  0
  6   6  H    5  0.968546( 5)  3  97.149( 12)  1  135.000( 18)  0
  7   7  H    2  1.083248( 6)  1  112.404( 13)  3  0.000( 19)  0
  8   8  H    2  1.087522( 7)  1  106.546( 14)  7  121.518( 20)  0
  9   9  H    2  1.088053( 8)  1  109.534( 15)  7 -121.995( 21)  0
-----

```

-304.19425925 Energy CCSD(T)-F12/CVTA-F12

=====  
 Geometry (MP2/AVTZ) 108

-----  
 Z-MATRIX (ANGSTROMS AND DEGREES)

| CD | Cent | Atom | N1 | Length/X     | N2 | Alpha/Y      | N3 | Beta/Z        | J |
|----|------|------|----|--------------|----|--------------|----|---------------|---|
| 1  | 1    | C    |    |              |    |              |    |               |   |
| 2  | 2    | C    | 1  | 1.497698( 1) |    |              |    |               |   |
| 3  | 3    | O    | 1  | 1.391927( 2) | 2  | 116.330( 9)  |    |               |   |
| 4  | 4    | O    | 1  | 1.201377( 3) | 2  | 125.896( 10) | 3  | 191.857( 16)  | 0 |
| 5  | 5    | O    | 3  | 1.463990( 4) | 1  | 108.404( 11) | 2  | 45.000( 17)   | 0 |
| 6  | 6    | H    | 5  | 0.968506( 5) | 3  | 97.217( 12)  | 1  | 135.000( 18)  | 0 |
| 7  | 7    | H    | 2  | 1.090033( 6) | 1  | 105.974( 13) | 3  | 90.000( 19)   | 0 |
| 8  | 8    | H    | 2  | 1.085614( 7) | 1  | 109.164( 14) | 7  | 116.477( 20)  | 0 |
| 9  | 9    | H    | 2  | 1.083116( 8) | 1  | 112.978( 15) | 7  | -119.535( 21) | 0 |

-304.19452957 Energy CCSD(T)-F12/CVTA-F12

=====  
=====

Geometry (MP2/AVTZ) 109

Z-MATRIX (ANGSTROMS AND DEGREES)

| CD | Cent | Atom | N1 | Length/X     | N2 | Alpha/Y      | N3 | Beta/Z        | J |
|----|------|------|----|--------------|----|--------------|----|---------------|---|
| 1  | 1    | C    |    |              |    |              |    |               |   |
| 2  | 2    | C    | 1  | 1.496443( 1) |    |              |    |               |   |
| 3  | 3    | O    | 1  | 1.392973( 2) | 2  | 115.611( 9)  |    |               |   |
| 4  | 4    | O    | 1  | 1.201446( 3) | 2  | 126.623( 10) | 3  | 191.719( 16)  | 0 |
| 5  | 5    | O    | 3  | 1.464462( 4) | 1  | 108.163( 11) | 2  | 45.000( 17)   | 0 |
| 6  | 6    | H    | 5  | 0.968353( 5) | 3  | 97.222( 12)  | 1  | 135.000( 18)  | 0 |
| 7  | 7    | H    | 2  | 1.084258( 6) | 1  | 108.786( 13) | 3  | 180.000( 19)  | 0 |
| 8  | 8    | H    | 2  | 1.085746( 7) | 1  | 111.695( 14) | 7  | 122.497( 20)  | 0 |
| 9  | 9    | H    | 2  | 1.089137( 8) | 1  | 107.524( 15) | 7  | -119.372( 21) | 0 |

-304.19497505 Energy CCSD(T)-F12/CVTA-F12

=====  
=====

Geometry (MP2/AVTZ) 110

Z-MATRIX (ANGSTROMS AND DEGREES)

| CD | Cent | Atom | N1 | Length/X     | N2 | Alpha/Y      | N3 | Beta/Z        | J |
|----|------|------|----|--------------|----|--------------|----|---------------|---|
| 1  | 1    | C    |    |              |    |              |    |               |   |
| 2  | 2    | C    | 1  | 1.498677( 1) |    |              |    |               |   |
| 3  | 3    | O    | 1  | 1.392247( 2) | 2  | 115.420( 9)  |    |               |   |
| 4  | 4    | O    | 1  | 1.201155( 3) | 2  | 126.612( 10) | 3  | 190.403( 16)  | 0 |
| 5  | 5    | O    | 3  | 1.465854( 4) | 1  | 106.734( 11) | 2  | 45.000( 17)   | 0 |
| 6  | 6    | H    | 5  | 0.968334( 5) | 3  | 97.201( 12)  | 1  | 135.000( 18)  | 0 |
| 7  | 7    | H    | 2  | 1.088652( 6) | 1  | 110.149( 13) | 3  | 270.000( 19)  | 0 |
| 8  | 8    | H    | 2  | 1.085636( 7) | 1  | 110.408( 14) | 7  | 119.417( 20)  | 0 |
| 9  | 9    | H    | 2  | 1.085082( 8) | 1  | 107.775( 15) | 7  | -118.690( 21) | 0 |

-304.19476498 Energy CCSD(T)-F12/CVTA-F12

=====  
=====

Geometry (MP2/AVTZ) 111

Z-MATRIX (ANGSTROMS AND DEGREES)

| CD | Cent | Atom | N1 | Length/X | N2 | Alpha/Y | N3 | Beta/Z | J |
|----|------|------|----|----------|----|---------|----|--------|---|
| 1  | 1    | C    |    |          |    |         |    |        |   |

```

2  2 C   1  1.500298(  1)
3  3 O   1  1.388670(  2)  2 116.615(  9)
4  4 O   1  1.201401(  3)  2 125.709( 10)  3 190.750( 16)  0
5  5 O   3  1.466789(  4)  1 107.054( 11)  2  45.000( 17)  0
6  6 H   5  0.968367(  5)  3  97.167( 12)  1 180.000( 18)  0
7  7 H   2  1.082856(  6)  1 112.392( 13)  3   0.000( 19)  0
8  8 H   2  1.087408(  7)  1 106.458( 14)  7 121.746( 20)  0
9  9 H   2  1.088219(  8)  1 109.505( 15)  7 -121.878( 21)  0

```

-----  
-304.19339710 Energy CCSD(T)-F12/CVTA-F12  
=====

=====  
Geometry (MP2/AVTZ) 112  
-----

Z-MATRIX (ANGSTROMS AND DEGREES)

| CD | Cent | Atom | N1 | Length/X     | N2 | Alpha/Y      | N3 | Beta/Z        | J |
|----|------|------|----|--------------|----|--------------|----|---------------|---|
| 1  | 1    | C    |    |              |    |              |    |               |   |
| 2  | 2    | C    | 1  | 1.498307( 1) |    |              |    |               |   |
| 3  | 3    | O    | 1  | 1.388950( 2) | 2  | 116.699( 9)  |    |               |   |
| 4  | 4    | O    | 1  | 1.201636( 3) | 2  | 125.705( 10) | 3  | 191.919( 16)  | 0 |
| 5  | 5    | O    | 3  | 1.466592( 4) | 1  | 108.112( 11) | 2  | 45.000( 17)   | 0 |
| 6  | 6    | H    | 5  | 0.968398( 5) | 3  | 97.130( 12)  | 1  | 180.000( 18)  | 0 |
| 7  | 7    | H    | 2  | 1.090021( 6) | 1  | 105.937( 13) | 3  | 90.000( 19)   | 0 |
| 8  | 8    | H    | 2  | 1.085572( 7) | 1  | 109.017( 14) | 7  | 116.336( 20)  | 0 |
| 9  | 9    | H    | 2  | 1.082873( 8) | 1  | 113.099( 15) | 7  | -119.638( 21) | 0 |

-----  
-304.19365073 Energy CCSD(T)-F12/CVTA-F12  
=====

=====  
Geometry (MP2/AVTZ) 113  
-----

Z-MATRIX (ANGSTROMS AND DEGREES)

| CD | Cent | Atom | N1 | Length/X     | N2 | Alpha/Y      | N3 | Beta/Z        | J |
|----|------|------|----|--------------|----|--------------|----|---------------|---|
| 1  | 1    | C    |    |              |    |              |    |               |   |
| 2  | 2    | C    | 1  | 1.497158( 1) |    |              |    |               |   |
| 3  | 3    | O    | 1  | 1.389685( 2) | 2  | 115.896( 9)  |    |               |   |
| 4  | 4    | O    | 1  | 1.201652( 3) | 2  | 126.450( 10) | 3  | 191.672( 16)  | 0 |
| 5  | 5    | O    | 3  | 1.467206( 4) | 1  | 107.573( 11) | 2  | 45.000( 17)   | 0 |
| 6  | 6    | H    | 5  | 0.968302( 5) | 3  | 97.160( 12)  | 1  | 180.000( 18)  | 0 |
| 7  | 7    | H    | 2  | 1.084247( 6) | 1  | 108.567( 13) | 3  | 180.000( 19)  | 0 |
| 8  | 8    | H    | 2  | 1.085821( 7) | 1  | 111.866( 14) | 7  | 122.216( 20)  | 0 |
| 9  | 9    | H    | 2  | 1.088948( 8) | 1  | 107.642( 15) | 7  | -119.512( 21) | 0 |

-----  
-304.19426150 Energy CCSD(T)-F12/CVTA-F12  
=====

=====  
Geometry (MP2/AVTZ) 114  
-----

Z-MATRIX (ANGSTROMS AND DEGREES)

| CD | Cent | Atom | N1 | Length/X     | N2 | Alpha/Y      | N3 | Beta/Z       | J |
|----|------|------|----|--------------|----|--------------|----|--------------|---|
| 1  | 1    | C    |    |              |    |              |    |              |   |
| 2  | 2    | C    | 1  | 1.498957( 1) |    |              |    |              |   |
| 3  | 3    | O    | 1  | 1.389232( 2) | 2  | 115.664( 9)  |    |              |   |
| 4  | 4    | O    | 1  | 1.201403( 3) | 2  | 126.493( 10) | 3  | 190.426( 16) | 0 |

|   |   |   |   |              |   |              |   |               |   |
|---|---|---|---|--------------|---|--------------|---|---------------|---|
| 5 | 5 | O | 3 | 1.467685( 4) | 1 | 106.294( 11) | 2 | 45.000( 17)   | 0 |
| 6 | 6 | H | 5 | 0.968241( 5) | 3 | 97.268( 12)  | 1 | 180.000( 18)  | 0 |
| 7 | 7 | H | 2 | 1.088986( 6) | 1 | 110.253( 13) | 3 | 270.000( 19)  | 0 |
| 8 | 8 | H | 2 | 1.085198( 7) | 1 | 110.496( 14) | 7 | 119.564( 20)  | 0 |
| 9 | 9 | H | 2 | 1.085115( 8) | 1 | 107.568( 15) | 7 | -118.465( 21) | 0 |

-304.19411741 Energy CCSD(T)-F12/CVTA-F12

=====  
Geometry (MP2/AVTZ) 115

Z-MATRIX (ANGSTROMS AND DEGREES)

| CD | Cent | Atom | N1 | Length/X     | N2 | Alpha/Y      | N3 | Beta/Z        | J |
|----|------|------|----|--------------|----|--------------|----|---------------|---|
| 1  | 1    | C    |    |              |    |              |    |               |   |
| 2  | 2    | C    | 1  | 1.500449( 1) |    |              |    |               |   |
| 3  | 3    | O    | 1  | 1.391794( 2) | 2  | 117.281( 9)  |    |               |   |
| 4  | 4    | O    | 1  | 1.201210( 3) | 2  | 125.389( 10) | 3  | 190.154( 16)  | 0 |
| 5  | 5    | O    | 3  | 1.456669( 4) | 1  | 108.199( 11) | 2  | 45.000( 17)   | 0 |
| 6  | 6    | H    | 5  | 0.968758( 5) | 3  | 99.159( 12)  | 1  | 225.000( 18)  | 0 |
| 7  | 7    | H    | 2  | 1.082394( 6) | 1  | 112.801( 13) | 3  | 0.000( 19)    | 0 |
| 8  | 8    | H    | 2  | 1.087409( 7) | 1  | 106.493( 14) | 7  | 122.112( 20)  | 0 |
| 9  | 9    | H    | 2  | 1.088214( 8) | 1  | 109.393( 15) | 7  | -121.565( 21) | 0 |

-304.19393438 Energy CCSD(T)-F12/CVTA-F12

=====  
Geometry (MP2/AVTZ) 116

Z-MATRIX (ANGSTROMS AND DEGREES)

| CD | Cent | Atom | N1 | Length/X     | N2 | Alpha/Y      | N3 | Beta/Z        | J |
|----|------|------|----|--------------|----|--------------|----|---------------|---|
| 1  | 1    | C    |    |              |    |              |    |               |   |
| 2  | 2    | C    | 1  | 1.498712( 1) |    |              |    |               |   |
| 3  | 3    | O    | 1  | 1.392191( 2) | 2  | 117.293( 9)  |    |               |   |
| 4  | 4    | O    | 1  | 1.201420( 3) | 2  | 125.501( 10) | 3  | 191.440( 16)  | 0 |
| 5  | 5    | O    | 3  | 1.456345( 4) | 1  | 109.312( 11) | 2  | 45.000( 17)   | 0 |
| 6  | 6    | H    | 5  | 0.968642( 5) | 3  | 99.056( 12)  | 1  | 225.000( 18)  | 0 |
| 7  | 7    | H    | 2  | 1.090048( 6) | 1  | 106.150( 13) | 3  | 90.000( 19)   | 0 |
| 8  | 8    | H    | 2  | 1.085675( 7) | 1  | 108.842( 14) | 7  | 116.202( 20)  | 0 |
| 9  | 9    | H    | 2  | 1.082430( 8) | 1  | 113.146( 15) | 7  | -120.249( 21) | 0 |

-304.19408335 Energy CCSD(T)-F12/CVTA-F12

=====  
Geometry (MP2/AVTZ) 117

Z-MATRIX (ANGSTROMS AND DEGREES)

| CD | Cent | Atom | N1 | Length/X     | N2 | Alpha/Y      | N3 | Beta/Z       | J |
|----|------|------|----|--------------|----|--------------|----|--------------|---|
| 1  | 1    | C    |    |              |    |              |    |              |   |
| 2  | 2    | C    | 1  | 1.497891( 1) |    |              |    |              |   |
| 3  | 3    | O    | 1  | 1.392880( 2) | 2  | 116.437( 9)  |    |              |   |
| 4  | 4    | O    | 1  | 1.201403( 3) | 2  | 126.244( 10) | 3  | 191.133( 16) | 0 |
| 5  | 5    | O    | 3  | 1.457488( 4) | 1  | 108.705( 11) | 2  | 45.000( 17)  | 0 |
| 6  | 6    | H    | 5  | 0.968571( 5) | 3  | 99.134( 12)  | 1  | 225.000( 18) | 0 |
| 7  | 7    | H    | 2  | 1.084316( 6) | 1  | 108.414( 13) | 3  | 180.000( 19) | 0 |

8 8 H 2 1.085254( 7) 1 111.908( 14) 7 122.054( 20) 0  
9 9 H 2 1.089290( 8) 1 107.840( 15) 7 -119.233( 21) 0

-----  
-304.19477131 Energy CCSD(T)-F12/CVTA-F12  
=====

=====  
Geometry (MP2/AVTZ) 118  
-----

Z-MATRIX (ANGSTROMS AND DEGREES)  
CD Cent Atom N1 Length/X N2 Alpha/Y N3 Beta/Z J  
-----  
1 1 C  
2 2 C 1 1.499445( 1)  
3 3 O 1 1.392097( 2) 2 116.232( 9)  
4 4 O 1 1.201148( 3) 2 126.235( 10) 3 189.777( 16) 0  
5 5 O 3 1.457711( 4) 1 107.293( 11) 2 45.000( 17) 0  
6 6 H 5 0.968670( 5) 3 99.215( 12) 1 225.000( 18) 0  
7 7 H 2 1.088462( 6) 1 110.373( 13) 3 270.000( 19) 0  
8 8 H 2 1.085383( 7) 1 110.828( 14) 7 119.879( 20) 0  
9 9 H 2 1.085279( 8) 1 107.427( 15) 7 -118.505( 21) 0  
-----

-----  
-304.19479560 Energy CCSD(T)-F12/CVTA-F12  
=====

=====  
Geometry (MP2/AVTZ) 119  
-----

Z-MATRIX (ANGSTROMS AND DEGREES)  
CD Cent Atom N1 Length/X N2 Alpha/Y N3 Beta/Z J  
-----  
1 1 C  
2 2 C 1 1.502344( 1)  
3 3 O 1 1.391426( 2) 2 118.007( 9)  
4 4 O 1 1.200967( 3) 2 124.471( 10) 3 190.122( 16) 0  
5 5 O 3 1.449878( 4) 1 110.167( 11) 2 45.000( 17) 0  
6 6 H 5 0.969643( 5) 3 101.573( 12) 1 270.000( 18) 0  
7 7 H 2 1.083625( 6) 1 114.219( 13) 3 0.000( 19) 0  
8 8 H 2 1.087228( 7) 1 106.498( 14) 7 121.836( 20) 0  
9 9 H 2 1.088020( 8) 1 109.218( 15) 7 -121.805( 21) 0  
-----

-----  
-304.19162271 Energy CCSD(T)-F12/CVTA-F12  
=====

=====  
Geometry (MP2/AVTZ) 120  
-----

Z-MATRIX (ANGSTROMS AND DEGREES)  
CD Cent Atom N1 Length/X N2 Alpha/Y N3 Beta/Z J  
-----  
1 1 C  
2 2 C 1 1.500428( 1)  
3 3 O 1 1.392697( 2) 2 117.748( 9)  
4 4 O 1 1.201052( 3) 2 124.829( 10) 3 191.655( 16) 0  
5 5 O 3 1.449533( 4) 1 111.184( 11) 2 45.000( 17) 0  
6 6 H 5 0.969702( 5) 3 101.426( 12) 1 270.000( 18) 0  
7 7 H 2 1.089795( 6) 1 106.493( 13) 3 90.000( 19) 0  
8 8 H 2 1.085899( 7) 1 108.548( 14) 7 115.998( 20) 0  
9 9 H 2 1.083362( 8) 1 114.086( 15) 7 -121.486( 21) 0  
-----

-304.19195334 Energy CCSD(T)-F12/CVTA-F12

=====  
Geometry (MP2/AVTZ) 121

Z-MATRIX (ANGSTROMS AND DEGREES)

| CD | Cent | Atom | N1 | Length/X     | N2 | Alpha/Y      | N3 | Beta/Z        | J |
|----|------|------|----|--------------|----|--------------|----|---------------|---|
| 1  | 1    | C    |    |              |    |              |    |               |   |
| 2  | 2    | C    | 1  | 1.499402( 1) |    |              |    |               |   |
| 3  | 3    | O    | 1  | 1.393729( 2) | 2  | 116.498( 9)  |    |               |   |
| 4  | 4    | O    | 1  | 1.200892( 3) | 2  | 125.917( 10) | 3  | 191.242( 16)  | 0 |
| 5  | 5    | O    | 3  | 1.450528( 4) | 1  | 110.469( 11) | 2  | 45.000( 17)   | 0 |
| 6  | 6    | H    | 5  | 0.970067( 5) | 3  | 101.413( 12) | 1  | 270.000( 18)  | 0 |
| 7  | 7    | H    | 2  | 1.084298( 6) | 1  | 108.473( 13) | 3  | 180.000( 19)  | 0 |
| 8  | 8    | H    | 2  | 1.086384( 7) | 1  | 111.904( 14) | 7  | 121.118( 20)  | 0 |
| 9  | 9    | H    | 2  | 1.089901( 8) | 1  | 108.214( 15) | 7  | -119.164( 21) | 0 |

-304.19300712 Energy CCSD(T)-F12/CVTA-F12

=====  
Geometry (MP2/AVTZ) 122

Z-MATRIX (ANGSTROMS AND DEGREES)

| CD | Cent | Atom | N1 | Length/X     | N2 | Alpha/Y      | N3 | Beta/Z        | J |
|----|------|------|----|--------------|----|--------------|----|---------------|---|
| 1  | 1    | C    |    |              |    |              |    |               |   |
| 2  | 2    | C    | 1  | 1.501518( 1) |    |              |    |               |   |
| 3  | 3    | O    | 1  | 1.391762( 2) | 2  | 116.511( 9)  |    |               |   |
| 4  | 4    | O    | 1  | 1.200822( 3) | 2  | 125.698( 10) | 3  | 189.734( 16)  | 0 |
| 5  | 5    | O    | 3  | 1.450917( 4) | 1  | 109.154( 11) | 2  | 45.000( 17)   | 0 |
| 6  | 6    | H    | 5  | 0.970098( 5) | 3  | 101.509( 12) | 1  | 270.000( 18)  | 0 |
| 7  | 7    | H    | 2  | 1.088487( 6) | 1  | 110.481( 13) | 3  | 270.000( 19)  | 0 |
| 8  | 8    | H    | 2  | 1.087068( 7) | 1  | 111.447( 14) | 7  | 121.104( 20)  | 0 |
| 9  | 9    | H    | 2  | 1.085253( 8) | 1  | 107.366( 15) | 7  | -118.269( 21) | 0 |

-304.19290723 Energy CCSD(T)-F12/CVTA-F12

=====  
Geometry (MP2/AVTZ) 123

Z-MATRIX (ANGSTROMS AND DEGREES)

| CD | Cent | Atom | N1 | Length/X     | N2 | Alpha/Y      | N3 | Beta/Z        | J |
|----|------|------|----|--------------|----|--------------|----|---------------|---|
| 1  | 1    | C    |    |              |    |              |    |               |   |
| 2  | 2    | C    | 1  | 1.506642( 1) |    |              |    |               |   |
| 3  | 3    | O    | 1  | 1.383409( 2) | 2  | 118.382( 9)  |    |               |   |
| 4  | 4    | O    | 1  | 1.201664( 3) | 2  | 123.577( 10) | 3  | 190.678( 16)  | 0 |
| 5  | 5    | O    | 3  | 1.451750( 4) | 1  | 113.066( 11) | 2  | 45.000( 17)   | 0 |
| 6  | 6    | H    | 5  | 0.969787( 5) | 3  | 103.266( 12) | 1  | 315.000( 18)  | 0 |
| 7  | 7    | H    | 2  | 1.087101( 6) | 1  | 115.500( 13) | 3  | 0.000( 19)    | 0 |
| 8  | 8    | H    | 2  | 1.086918( 7) | 1  | 106.173( 14) | 7  | 120.393( 20)  | 0 |
| 9  | 9    | H    | 2  | 1.088024( 8) | 1  | 109.488( 15) | 7  | -123.243( 21) | 0 |

-304.18534763 Energy CCSD(T)-F12/CVTA-F12

=====

Geometry (MP2/AVTZ) 124

-----  
Z-MATRIX (ANGSTROMS AND DEGREES)  
-----

| CD | Cent | Atom | N1 | Length/X     | N2 | Alpha/Y      | N3 | Beta/Z        | J |
|----|------|------|----|--------------|----|--------------|----|---------------|---|
| 1  | 1    | C    |    |              |    |              |    |               |   |
| 2  | 2    | C    | 1  | 1.505799( 1) |    |              |    |               |   |
| 3  | 3    | O    | 1  | 1.384454( 2) | 2  | 118.781( 9)  |    |               |   |
| 4  | 4    | O    | 1  | 1.201781( 3) | 2  | 123.312( 10) | 3  | 192.636( 16)  | 0 |
| 5  | 5    | O    | 3  | 1.451896( 4) | 1  | 114.140( 11) | 2  | 45.000( 17)   | 0 |
| 6  | 6    | H    | 5  | 0.968812( 5) | 3  | 103.262( 12) | 1  | 315.000( 18)  | 0 |
| 7  | 7    | H    | 2  | 1.089450( 6) | 1  | 106.139( 13) | 3  | 90.000( 19)   | 0 |
| 8  | 8    | H    | 2  | 1.085635( 7) | 1  | 108.244( 14) | 7  | 116.072( 20)  | 0 |
| 9  | 9    | H    | 2  | 1.086242( 8) | 1  | 116.717( 15) | 7  | -121.151( 21) | 0 |

-----

-304.18501552 Energy CCSD(T)-F12/CVTA-F12

=====  
Geometry (MP2/AVTZ) 125

-----  
Z-MATRIX (ANGSTROMS AND DEGREES)  
-----

| CD | Cent | Atom | N1 | Length/X     | N2 | Alpha/Y      | N3 | Beta/Z        | J |
|----|------|------|----|--------------|----|--------------|----|---------------|---|
| 1  | 1    | C    |    |              |    |              |    |               |   |
| 2  | 2    | C    | 1  | 1.504243( 1) |    |              |    |               |   |
| 3  | 3    | O    | 1  | 1.386562( 2) | 2  | 117.118( 9)  |    |               |   |
| 4  | 4    | O    | 1  | 1.201557( 3) | 2  | 124.842( 10) | 3  | 192.233( 16)  | 0 |
| 5  | 5    | O    | 3  | 1.453243( 4) | 1  | 113.507( 11) | 2  | 45.000( 17)   | 0 |
| 6  | 6    | H    | 5  | 0.969572( 5) | 3  | 103.274( 12) | 1  | 315.000( 18)  | 0 |
| 7  | 7    | H    | 2  | 1.084410( 6) | 1  | 108.007( 13) | 3  | 180.000( 19)  | 0 |
| 8  | 8    | H    | 2  | 1.089402( 7) | 1  | 113.320( 14) | 7  | 119.109( 20)  | 0 |
| 9  | 9    | H    | 2  | 1.089243( 8) | 1  | 108.559( 15) | 7  | -119.628( 21) | 0 |

-----

-304.18634724 Energy CCSD(T)-F12/CVTA-F12

=====  
Geometry (MP2/AVTZ) 126

-----  
Z-MATRIX (ANGSTROMS AND DEGREES)  
-----

| CD | Cent | Atom | N1 | Length/X     | N2 | Alpha/Y      | N3 | Beta/Z        | J |
|----|------|------|----|--------------|----|--------------|----|---------------|---|
| 1  | 1    | C    |    |              |    |              |    |               |   |
| 2  | 2    | C    | 1  | 1.505818( 1) |    |              |    |               |   |
| 3  | 3    | O    | 1  | 1.384631( 2) | 2  | 116.553( 9)  |    |               |   |
| 4  | 4    | O    | 1  | 1.201411( 3) | 2  | 125.095( 10) | 3  | 190.667( 16)  | 0 |
| 5  | 5    | O    | 3  | 1.453648( 4) | 1  | 112.047( 11) | 2  | 45.000( 17)   | 0 |
| 6  | 6    | H    | 5  | 0.970849( 5) | 3  | 103.320( 12) | 1  | 315.000( 18)  | 0 |
| 7  | 7    | H    | 2  | 1.090077( 6) | 1  | 111.146( 13) | 3  | 270.000( 19)  | 0 |
| 8  | 8    | H    | 2  | 1.089304( 7) | 1  | 111.235( 14) | 7  | 122.313( 20)  | 0 |
| 9  | 9    | H    | 2  | 1.084893( 8) | 1  | 107.311( 15) | 7  | -117.885( 21) | 0 |

-----

-304.18692288 Energy CCSD(T)-F12/CVTA-F12

=====  
Geometry (MP2/AVTZ) 127

-----  
Z-MATRIX (ANGSTROMS AND DEGREES)  
-----



| CD | Cent | Atom | N1 | Length/X     | N2 | Alpha/Y      | N3 | Beta/Z        | J |
|----|------|------|----|--------------|----|--------------|----|---------------|---|
| 1  | 1    | C    |    |              |    |              |    |               |   |
| 2  | 2    | C    | 1  | 1.507972( 1) |    |              |    |               |   |
| 3  | 3    | O    | 1  | 1.370364( 2) | 2  | 122.067( 9)  |    |               |   |
| 4  | 4    | O    | 1  | 1.204040( 3) | 2  | 122.412( 10) | 3  | 180.000( 16)  | 0 |
| 5  | 5    | O    | 3  | 1.450846( 4) | 1  | 118.230( 11) | 2  | 0.000( 17)    | 0 |
| 6  | 6    | H    | 5  | 0.967115( 5) | 3  | 103.760( 12) | 1  | 0.000( 18)    | 0 |
| 7  | 7    | H    | 2  | 1.086269( 6) | 1  | 118.770( 13) | 3  | 0.000( 19)    | 0 |
| 8  | 8    | H    | 2  | 1.087462( 7) | 1  | 106.748( 14) | 7  | 122.400( 20)  | 0 |
| 9  | 9    | H    | 2  | 1.087462( 8) | 1  | 106.748( 15) | 7  | -122.400( 21) | 0 |

-304.18580562 Energy CCSD(T)-F12/CVTA-F12

=====  
=====

Geometry (MP2/AVTZ) 128

Z-MATRIX (ANGSTROMS AND DEGREES)

| CD | Cent | Atom | N1 | Length/X     | N2 | Alpha/Y      | N3 | Beta/Z        | J |
|----|------|------|----|--------------|----|--------------|----|---------------|---|
| 1  | 1    | C    |    |              |    |              |    |               |   |
| 2  | 2    | C    | 1  | 1.505945( 1) |    |              |    |               |   |
| 3  | 3    | O    | 1  | 1.370635( 2) | 2  | 120.145( 9)  |    |               |   |
| 4  | 4    | O    | 1  | 1.203901( 3) | 2  | 123.954( 10) | 3  | 181.172( 16)  | 0 |
| 5  | 5    | O    | 3  | 1.451550( 4) | 1  | 117.388( 11) | 2  | 0.000( 17)    | 0 |
| 6  | 6    | H    | 5  | 0.968039( 5) | 3  | 103.926( 12) | 1  | 0.000( 18)    | 0 |
| 7  | 7    | H    | 2  | 1.089514( 6) | 1  | 109.117( 13) | 3  | 90.000( 19)   | 0 |
| 8  | 8    | H    | 2  | 1.085987( 7) | 1  | 106.007( 14) | 7  | 115.368( 20)  | 0 |
| 9  | 9    | H    | 2  | 1.088185( 8) | 1  | 115.817( 15) | 7  | -125.252( 21) | 0 |

-304.18795146 Energy CCSD(T)-F12/CVTA-F12

=====  
=====

Geometry (MP2/AVTZ) 129

Z-MATRIX (ANGSTROMS AND DEGREES)

| CD | Cent | Atom | N1 | Length/X     | N2 | Alpha/Y      | N3 | Beta/Z        | J |
|----|------|------|----|--------------|----|--------------|----|---------------|---|
| 1  | 1    | C    |    |              |    |              |    |               |   |
| 2  | 2    | C    | 1  | 1.503077( 1) |    |              |    |               |   |
| 3  | 3    | O    | 1  | 1.371946( 2) | 2  | 118.501( 9)  |    |               |   |
| 4  | 4    | O    | 1  | 1.203512( 3) | 2  | 125.317( 10) | 3  | 180.000( 16)  | 0 |
| 5  | 5    | O    | 3  | 1.452420( 4) | 1  | 116.767( 11) | 2  | 0.000( 17)    | 0 |
| 6  | 6    | H    | 5  | 0.968450( 5) | 3  | 104.167( 12) | 1  | 0.000( 18)    | 0 |
| 7  | 7    | H    | 2  | 1.084206( 6) | 1  | 107.336( 13) | 3  | 180.000( 19)  | 0 |
| 8  | 8    | H    | 2  | 1.090835( 7) | 1  | 111.228( 14) | 7  | 118.888( 20)  | 0 |
| 9  | 9    | H    | 2  | 1.090835( 8) | 1  | 111.228( 15) | 7  | -118.888( 21) | 0 |

-304.18994045 Energy CCSD(T)-F12/CVTA-F12

=====  
=====

Geometry (MP2/AVTZ) 130

Z-MATRIX (ANGSTROMS AND DEGREES)

| CD | Cent | Atom | N1 | Length/X | N2 | Alpha/Y | N3 | Beta/Z | J |
|----|------|------|----|----------|----|---------|----|--------|---|
| 1  | 1    | C    |    |          |    |         |    |        |   |

```

2  2 C   1  1.504016(  1)
3  3 O   1  1.378625(  2)  2 120.853(  9)
4  4 O   1  1.202985(  3)  2 123.819( 10)  3 179.722( 16)  0
5  5 O   3  1.449563(  4)  1 116.386( 11)  2  0.000( 17)  0
6  6 H   5  0.968656(  5)  3 102.734( 12)  1  45.000( 18)  0
7  7 H   2  1.083265(  6)  1 116.338( 13)  3  0.000( 19)  0
8  8 H   2  1.088006(  7)  1 106.708( 14)  7 121.010( 20)  0
9  9 H   2  1.087641(  8)  1 107.433( 15)  7 -123.861( 21)  0

```

-----  
-304.19053125 Energy CCSD(T)-F12/CVTA-F12  
=====

=====  
Geometry (MP2/AVTZ) 131  
-----

Z-MATRIX (ANGSTROMS AND DEGREES)

| CD | Cent | Atom | N1 | Length/X     | N2 | Alpha/Y      | N3 | Beta/Z        | J |
|----|------|------|----|--------------|----|--------------|----|---------------|---|
| 1  | 1    | C    |    |              |    |              |    |               |   |
| 2  | 2    | C    | 1  | 1.503099( 1) |    |              |    |               |   |
| 3  | 3    | O    | 1  | 1.377174( 2) | 2  | 120.127( 9)  |    |               |   |
| 4  | 4    | O    | 1  | 1.203224( 3) | 2  | 124.322( 10) | 3  | 180.931( 16)  | 0 |
| 5  | 5    | O    | 3  | 1.449034( 4) | 1  | 115.838( 11) | 2  | 0.000( 17)    | 0 |
| 6  | 6    | H    | 5  | 0.968129( 5) | 3  | 102.836( 12) | 1  | 45.000( 18)   | 0 |
| 7  | 7    | H    | 2  | 1.089437( 6) | 1  | 108.065( 13) | 3  | 90.000( 19)   | 0 |
| 8  | 8    | H    | 2  | 1.085585( 7) | 1  | 106.528( 14) | 7  | 115.860( 20)  | 0 |
| 9  | 9    | H    | 2  | 1.085164( 8) | 1  | 116.318( 15) | 7  | -122.153( 21) | 0 |

-----  
-304.19140824 Energy CCSD(T)-F12/CVTA-F12  
=====

=====  
Geometry (MP2/AVTZ) 132  
-----

Z-MATRIX (ANGSTROMS AND DEGREES)

| CD | Cent | Atom | N1 | Length/X     | N2 | Alpha/Y      | N3 | Beta/Z        | J |
|----|------|------|----|--------------|----|--------------|----|---------------|---|
| 1  | 1    | C    |    |              |    |              |    |               |   |
| 2  | 2    | C    | 1  | 1.500323( 1) |    |              |    |               |   |
| 3  | 3    | O    | 1  | 1.378166( 2) | 2  | 118.141( 9)  |    |               |   |
| 4  | 4    | O    | 1  | 1.202903( 3) | 2  | 125.884( 10) | 3  | 179.828( 16)  | 0 |
| 5  | 5    | O    | 3  | 1.449579( 4) | 1  | 114.839( 11) | 2  | 0.000( 17)    | 0 |
| 6  | 6    | H    | 5  | 0.968927( 5) | 3  | 102.956( 12) | 1  | 45.000( 18)   | 0 |
| 7  | 7    | H    | 2  | 1.084283( 6) | 1  | 107.392( 13) | 3  | 180.000( 19)  | 0 |
| 8  | 8    | H    | 2  | 1.091261( 7) | 1  | 111.545( 14) | 7  | 118.034( 20)  | 0 |
| 9  | 9    | H    | 2  | 1.087599( 8) | 1  | 110.660( 15) | 7  | -121.278( 21) | 0 |

-----  
-304.19383933 Energy CCSD(T)-F12/CVTA-F12  
=====

=====  
Geometry (MP2/AVTZ) 133  
-----

Z-MATRIX (ANGSTROMS AND DEGREES)

| CD | Cent | Atom | N1 | Length/X     | N2 | Alpha/Y      | N3 | Beta/Z       | J |
|----|------|------|----|--------------|----|--------------|----|--------------|---|
| 1  | 1    | C    |    |              |    |              |    |              |   |
| 2  | 2    | C    | 1  | 1.501622( 1) |    |              |    |              |   |
| 3  | 3    | O    | 1  | 1.379182( 2) | 2  | 118.866( 9)  |    |              |   |
| 4  | 4    | O    | 1  | 1.202847( 3) | 2  | 125.373( 10) | 3  | 178.954( 16) | 0 |

|   |   |   |   |              |   |              |   |               |   |
|---|---|---|---|--------------|---|--------------|---|---------------|---|
| 5 | 5 | O | 3 | 1.450047( 4) | 1 | 115.305( 11) | 2 | 0.000( 17)    | 0 |
| 6 | 6 | H | 5 | 0.969424( 5) | 3 | 102.887( 12) | 1 | 45.000( 18)   | 0 |
| 7 | 7 | H | 2 | 1.091177( 6) | 1 | 109.172( 13) | 3 | 270.000( 19)  | 0 |
| 8 | 8 | H | 2 | 1.084823( 7) | 1 | 113.367( 14) | 7 | 123.523( 20)  | 0 |
| 9 | 9 | H | 2 | 1.085761( 8) | 1 | 106.668( 15) | 7 | -115.265( 21) | 0 |

-304.19289240 Energy CCSD(T)-F12/CVTA-F12

=====  
Geometry (MP2/AVTZ) 134

Z-MATRIX (ANGSTROMS AND DEGREES)

| CD | Cent | Atom | N1 | Length/X     | N2 | Alpha/Y      | N3 | Beta/Z        | J |
|----|------|------|----|--------------|----|--------------|----|---------------|---|
| 1  | 1    | C    |    |              |    |              |    |               |   |
| 2  | 2    | C    | 1  | 1.499685( 1) |    |              |    |               |   |
| 3  | 3    | O    | 1  | 1.386883( 2) | 2  | 120.001( 9)  |    |               |   |
| 4  | 4    | O    | 1  | 1.202471( 3) | 2  | 125.111( 10) | 3  | 180.138( 16)  | 0 |
| 5  | 5    | O    | 3  | 1.447588( 4) | 1  | 114.073( 11) | 2  | 0.000( 17)    | 0 |
| 6  | 6    | H    | 5  | 0.969572( 5) | 3  | 100.415( 12) | 1  | 90.000( 18)   | 0 |
| 7  | 7    | H    | 2  | 1.081059( 6) | 1  | 114.234( 13) | 3  | 0.000( 19)    | 0 |
| 8  | 8    | H    | 2  | 1.087933( 7) | 1  | 107.049( 14) | 7  | 121.824( 20)  | 0 |
| 9  | 9    | H    | 2  | 1.088089( 8) | 1  | 107.413( 15) | 7  | -123.022( 21) | 0 |

-304.19720489 Energy CCSD(T)-F12/CVTA-F12

=====  
Geometry (MP2/AVTZ) 135

Z-MATRIX (ANGSTROMS AND DEGREES)

| CD | Cent | Atom | N1 | Length/X     | N2 | Alpha/Y      | N3 | Beta/Z        | J |
|----|------|------|----|--------------|----|--------------|----|---------------|---|
| 1  | 1    | C    |    |              |    |              |    |               |   |
| 2  | 2    | C    | 1  | 1.498468( 1) |    |              |    |               |   |
| 3  | 3    | O    | 1  | 1.385209( 2) | 2  | 119.221( 9)  |    |               |   |
| 4  | 4    | O    | 1  | 1.202668( 3) | 2  | 125.575( 10) | 3  | 181.082( 16)  | 0 |
| 5  | 5    | O    | 3  | 1.447578( 4) | 1  | 113.287( 11) | 2  | 0.000( 17)    | 0 |
| 6  | 6    | H    | 5  | 0.969459( 5) | 3  | 100.442( 12) | 1  | 90.000( 18)   | 0 |
| 7  | 7    | H    | 2  | 1.089675( 6) | 1  | 108.012( 13) | 3  | 90.000( 19)   | 0 |
| 8  | 8    | H    | 2  | 1.085756( 7) | 1  | 106.930( 14) | 7  | 116.028( 20)  | 0 |
| 9  | 9    | H    | 2  | 1.082239( 8) | 1  | 114.155( 15) | 7  | -120.783( 21) | 0 |

-304.19820278 Energy CCSD(T)-F12/CVTA-F12

=====  
Geometry (MP2/AVTZ) 136

Z-MATRIX (ANGSTROMS AND DEGREES)

| CD | Cent | Atom | N1 | Length/X     | N2 | Alpha/Y      | N3 | Beta/Z       | J |
|----|------|------|----|--------------|----|--------------|----|--------------|---|
| 1  | 1    | C    |    |              |    |              |    |              |   |
| 2  | 2    | C    | 1  | 1.496865( 1) |    |              |    |              |   |
| 3  | 3    | O    | 1  | 1.384814( 2) | 2  | 117.878( 9)  |    |              |   |
| 4  | 4    | O    | 1  | 1.202487( 3) | 2  | 126.565( 10) | 3  | 180.299( 16) | 0 |
| 5  | 5    | O    | 3  | 1.447721( 4) | 1  | 112.381( 11) | 2  | 0.000( 17)   | 0 |
| 6  | 6    | H    | 5  | 0.969392( 5) | 3  | 100.528( 12) | 1  | 90.000( 18)  | 0 |
| 7  | 7    | H    | 2  | 1.084469( 6) | 1  | 107.452( 13) | 3  | 180.000( 19) | 0 |

8 8 H 2 1.087869( 7) 1 111.028( 14) 7 119.903( 20) 0  
9 9 H 2 1.087083( 8) 1 110.330( 15) 7 -121.048( 21) 0

-----  
-304.19992990 Energy CCSD(T)-F12/CVTA-F12  
=====

=====  
Geometry (MP2/AVTZ) 137  
-----

Z-MATRIX (ANGSTROMS AND DEGREES)  
CD Cent Atom N1 Length/X N2 Alpha/Y N3 Beta/Z J  
-----  
1 1 C  
2 2 C 1 1.498215( 1)  
3 3 O 1 1.385743( 2) 2 118.786( 9)  
4 4 O 1 1.202595( 3) 2 125.948( 10) 3 179.472( 16) 0  
5 5 O 3 1.447631( 4) 1 113.079( 11) 2 0.000( 17) 0  
6 6 H 5 0.969411( 5) 3 100.516( 12) 1 90.000( 18) 0  
7 7 H 2 1.090364( 6) 1 108.661( 13) 3 270.000( 19) 0  
8 8 H 2 1.082649( 7) 1 113.003( 14) 7 121.632( 20) 0  
9 9 H 2 1.085763( 8) 1 106.835( 15) 7 -115.751( 21) 0  
-----

-----  
-304.19883256 Energy CCSD(T)-F12/CVTA-F12  
=====

=====  
Geometry (MP2/AVTZ) 138  
-----

Z-MATRIX (ANGSTROMS AND DEGREES)  
CD Cent Atom N1 Length/X N2 Alpha/Y N3 Beta/Z J  
-----  
1 1 C  
2 2 C 1 1.498658( 1)  
3 3 O 1 1.382449( 2) 2 119.830( 9)  
4 4 O 1 1.203130( 3) 2 125.296( 10) 3 180.566( 16) 0  
5 5 O 3 1.454763( 4) 1 112.519( 11) 2 0.000( 17) 0  
6 6 H 5 0.968689( 5) 3 98.069( 12) 1 135.000( 18) 0  
7 7 H 2 1.080691( 6) 1 114.112( 13) 3 0.000( 19) 0  
8 8 H 2 1.087879( 7) 1 107.115( 14) 7 122.468( 20) 0  
9 9 H 2 1.088093( 8) 1 107.218( 15) 7 -122.379( 21) 0  
-----

-----  
-304.19892531 Energy CCSD(T)-F12/CVTA-F12  
=====

=====  
Geometry (MP2/AVTZ) 139  
-----

Z-MATRIX (ANGSTROMS AND DEGREES)  
CD Cent Atom N1 Length/X N2 Alpha/Y N3 Beta/Z J  
-----  
1 1 C  
2 2 C 1 1.496828( 1)  
3 3 O 1 1.381698( 2) 2 118.883( 9)  
4 4 O 1 1.203362( 3) 2 125.977( 10) 3 181.421( 16) 0  
5 5 O 3 1.454706( 4) 1 111.816( 11) 2 0.000( 17) 0  
6 6 H 5 0.968545( 5) 3 98.140( 12) 1 135.000( 18) 0  
7 7 H 2 1.089826( 6) 1 108.120( 13) 3 90.000( 19) 0  
8 8 H 2 1.085753( 7) 1 106.964( 14) 7 116.006( 20) 0  
9 9 H 2 1.082009( 8) 1 113.259( 15) 7 -120.925( 21) 0  
-----

-304.20015503 Energy CCSD(T)-F12/CVTA-F12

=====  
Geometry (MP2/AVTZ) 140

Z-MATRIX (ANGSTROMS AND DEGREES)

| CD | Cent | Atom | N1 | Length/X     | N2 | Alpha/Y      | N3 | Beta/Z        | J |
|----|------|------|----|--------------|----|--------------|----|---------------|---|
| 1  | 1    | C    |    |              |    |              |    |               |   |
| 2  | 2    | C    | 1  | 1.495245( 1) |    |              |    |               |   |
| 3  | 3    | O    | 1  | 1.381114( 2) | 2  | 117.605( 9)  |    |               |   |
| 4  | 4    | O    | 1  | 1.203088( 3) | 2  | 126.871( 10) | 3  | 180.767( 16)  | 0 |
| 5  | 5    | O    | 3  | 1.455080( 4) | 1  | 110.741( 11) | 2  | 0.000( 17)    | 0 |
| 6  | 6    | H    | 5  | 0.968550( 5) | 3  | 98.158( 12)  | 1  | 135.000( 18)  | 0 |
| 7  | 7    | H    | 2  | 1.084361( 6) | 1  | 107.561( 13) | 3  | 180.000( 19)  | 0 |
| 8  | 8    | H    | 2  | 1.086950( 7) | 1  | 110.461( 14) | 7  | 120.663( 20)  | 0 |
| 9  | 9    | H    | 2  | 1.087645( 8) | 1  | 110.275( 15) | 7  | -120.790( 21) | 0 |

-304.20177089 Energy CCSD(T)-F12/CVTA-F12

=====  
Geometry (MP2/AVTZ) 141

Z-MATRIX (ANGSTROMS AND DEGREES)

| CD | Cent | Atom | N1 | Length/X     | N2 | Alpha/Y      | N3 | Beta/Z        | J |
|----|------|------|----|--------------|----|--------------|----|---------------|---|
| 1  | 1    | C    |    |              |    |              |    |               |   |
| 2  | 2    | C    | 1  | 1.497264( 1) |    |              |    |               |   |
| 3  | 3    | O    | 1  | 1.381040( 2) | 2  | 118.699( 9)  |    |               |   |
| 4  | 4    | O    | 1  | 1.203266( 3) | 2  | 126.040( 10) | 3  | 179.903( 16)  | 0 |
| 5  | 5    | O    | 3  | 1.455250( 4) | 1  | 111.437( 11) | 2  | 0.000( 17)    | 0 |
| 6  | 6    | H    | 5  | 0.968630( 5) | 3  | 98.152( 12)  | 1  | 135.000( 18)  | 0 |
| 7  | 7    | H    | 2  | 1.089664( 6) | 1  | 108.414( 13) | 3  | 270.000( 19)  | 0 |
| 8  | 8    | H    | 2  | 1.082503( 7) | 1  | 113.220( 14) | 7  | 121.217( 20)  | 0 |
| 9  | 9    | H    | 2  | 1.085807( 8) | 1  | 106.828( 15) | 7  | -116.078( 21) | 0 |

-304.20045093 Energy CCSD(T)-F12/CVTA-F12

=====  
Geometry (MP2/AVTZ) 142

Z-MATRIX (ANGSTROMS AND DEGREES)

| CD | Cent | Atom | N1 | Length/X     | N2 | Alpha/Y      | N3 | Beta/Z        | J |
|----|------|------|----|--------------|----|--------------|----|---------------|---|
| 1  | 1    | C    |    |              |    |              |    |               |   |
| 2  | 2    | C    | 1  | 1.498738( 1) |    |              |    |               |   |
| 3  | 3    | O    | 1  | 1.377321( 2) | 2  | 119.605( 9)  |    |               |   |
| 4  | 4    | O    | 1  | 1.203665( 3) | 2  | 125.287( 10) | 3  | 180.000( 16)  | 0 |
| 5  | 5    | O    | 3  | 1.461335( 4) | 1  | 111.514( 11) | 2  | 0.000( 17)    | 0 |
| 6  | 6    | H    | 5  | 0.968862( 5) | 3  | 96.883( 12)  | 1  | 180.000( 18)  | 0 |
| 7  | 7    | H    | 2  | 1.081001( 6) | 1  | 114.304( 13) | 3  | 0.000( 19)    | 0 |
| 8  | 8    | H    | 2  | 1.087956( 7) | 1  | 107.147( 14) | 7  | 122.399( 20)  | 0 |
| 9  | 9    | H    | 2  | 1.087956( 8) | 1  | 107.147( 15) | 7  | -122.399( 21) | 0 |

-304.19884550 Energy CCSD(T)-F12/CVTA-F12

=====  
=====

Geometry (MP2/AVTZ) 143

```
-----
                Z-MATRIX (ANGSTROMS AND DEGREES)
CD  Cent  Atom  N1   Length/X   N2   Alpha/Y   N3   Beta/Z   J
-----
```

| CD | Cent | Atom | N1 | Length/X     | N2 | Alpha/Y      | N3 | Beta/Z        | J |
|----|------|------|----|--------------|----|--------------|----|---------------|---|
| 1  | 1    | C    |    |              |    |              |    |               |   |
| 2  | 2    | C    | 1  | 1.496844( 1) |    |              |    |               |   |
| 3  | 3    | O    | 1  | 1.376935( 2) | 2  | 118.480( 9)  |    |               |   |
| 4  | 4    | O    | 1  | 1.203721( 3) | 2  | 126.139( 10) | 3  | 180.695( 16)  | 0 |
| 5  | 5    | O    | 3  | 1.461602( 4) | 1  | 110.650( 11) | 2  | 0.000( 17)    | 0 |
| 6  | 6    | H    | 5  | 0.968680( 5) | 3  | 96.880( 12)  | 1  | 180.000( 18)  | 0 |
| 7  | 7    | H    | 2  | 1.089665( 6) | 1  | 108.255( 13) | 3  | 90.000( 19)   | 0 |
| 8  | 8    | H    | 2  | 1.085644( 7) | 1  | 106.958( 14) | 7  | 116.154( 20)  | 0 |
| 9  | 9    | H    | 2  | 1.082769( 8) | 1  | 113.140( 15) | 7  | -121.101( 21) | 0 |

-304.20022249 Energy CCSD(T)-F12/CVTA-F12

=====  
 Geometry (MP2/AVTZ) 144

```
-----
                Z-MATRIX (ANGSTROMS AND DEGREES)
CD  Cent  Atom  N1   Length/X   N2   Alpha/Y   N3   Beta/Z   J
-----
```

| CD | Cent | Atom | N1 | Length/X     | N2 | Alpha/Y      | N3 | Beta/Z        | J |
|----|------|------|----|--------------|----|--------------|----|---------------|---|
| 1  | 1    | C    |    |              |    |              |    |               |   |
| 2  | 2    | C    | 1  | 1.494796( 1) |    |              |    |               |   |
| 3  | 3    | O    | 1  | 1.377081( 2) | 2  | 117.311( 9)  |    |               |   |
| 4  | 4    | O    | 1  | 1.203584( 3) | 2  | 127.019( 10) | 3  | 180.000( 16)  | 0 |
| 5  | 5    | O    | 3  | 1.461606( 4) | 1  | 109.824( 11) | 2  | 0.000( 17)    | 0 |
| 6  | 6    | H    | 5  | 0.968529( 5) | 3  | 97.008( 12)  | 1  | 180.000( 18)  | 0 |
| 7  | 7    | H    | 2  | 1.084210( 6) | 1  | 107.703( 13) | 3  | 180.000( 19)  | 0 |
| 8  | 8    | H    | 2  | 1.087522( 7) | 1  | 110.217( 14) | 7  | 120.772( 20)  | 0 |
| 9  | 9    | H    | 2  | 1.087522( 8) | 1  | 110.217( 15) | 7  | -120.772( 21) | 0 |

-304.20166241 Energy CCSD(T)-F12/CVTA-F12

=====  
 Geometry (MP2/AVTZ) 145

```
-----
                Z-MATRIX (ANGSTROMS AND DEGREES)
CD  Cent  Atom  N1   Length/X   N2   Alpha/Y   N3   Beta/Z   J
-----
```

| CD | Cent | Atom | N1 | Length/X     | N2 | Alpha/Y      | N3 | Beta/Z        | J |
|----|------|------|----|--------------|----|--------------|----|---------------|---|
| 1  | 1    | C    |    |              |    |              |    |               |   |
| 2  | 2    | C    | 1  | 1.498658( 1) |    |              |    |               |   |
| 3  | 3    | O    | 1  | 1.382449( 2) | 2  | 119.830( 9)  |    |               |   |
| 4  | 4    | O    | 1  | 1.203130( 3) | 2  | 125.296( 10) | 3  | 179.434( 16)  | 0 |
| 5  | 5    | O    | 3  | 1.454763( 4) | 1  | 112.519( 11) | 2  | 0.000( 17)    | 0 |
| 6  | 6    | H    | 5  | 0.968689( 5) | 3  | 98.069( 12)  | 1  | 225.000( 18)  | 0 |
| 7  | 7    | H    | 2  | 1.080691( 6) | 1  | 114.112( 13) | 3  | 0.000( 19)    | 0 |
| 8  | 8    | H    | 2  | 1.088093( 7) | 1  | 107.218( 14) | 7  | 122.379( 20)  | 0 |
| 9  | 9    | H    | 2  | 1.087879( 8) | 1  | 107.115( 15) | 7  | -122.468( 21) | 0 |

-304.19892531 Energy CCSD(T)-F12/CVTA-F12

=====  
 Geometry (MP2/AVTZ) 146

-----  
 Z-MATRIX (ANGSTROMS AND DEGREES)

| CD | Cent | Atom | N1 | Length/X     | N2 | Alpha/Y      | N3 | Beta/Z        | J |
|----|------|------|----|--------------|----|--------------|----|---------------|---|
| 1  | 1    | C    |    |              |    |              |    |               |   |
| 2  | 2    | C    | 1  | 1.497264( 1) |    |              |    |               |   |
| 3  | 3    | O    | 1  | 1.381040( 2) | 2  | 118.699( 9)  |    |               |   |
| 4  | 4    | O    | 1  | 1.203266( 3) | 2  | 126.040( 10) | 3  | 180.097( 16)  | 0 |
| 5  | 5    | O    | 3  | 1.455250( 4) | 1  | 111.437( 11) | 2  | 0.000( 17)    | 0 |
| 6  | 6    | H    | 5  | 0.968630( 5) | 3  | 98.152( 12)  | 1  | 225.000( 18)  | 0 |
| 7  | 7    | H    | 2  | 1.089664( 6) | 1  | 108.414( 13) | 3  | 90.000( 19)   | 0 |
| 8  | 8    | H    | 2  | 1.085807( 7) | 1  | 106.828( 14) | 7  | 116.078( 20)  | 0 |
| 9  | 9    | H    | 2  | 1.082503( 8) | 1  | 113.220( 15) | 7  | -121.217( 21) | 0 |

-304.20045093 Energy CCSD(T)-F12/CVTA-F12

=====  
=====

Geometry (MP2/AVTZ) 147

Z-MATRIX (ANGSTROMS AND DEGREES)

| CD | Cent | Atom | N1 | Length/X     | N2 | Alpha/Y      | N3 | Beta/Z        | J |
|----|------|------|----|--------------|----|--------------|----|---------------|---|
| 1  | 1    | C    |    |              |    |              |    |               |   |
| 2  | 2    | C    | 1  | 1.495245( 1) |    |              |    |               |   |
| 3  | 3    | O    | 1  | 1.381114( 2) | 2  | 117.605( 9)  |    |               |   |
| 4  | 4    | O    | 1  | 1.203088( 3) | 2  | 126.871( 10) | 3  | 179.233( 16)  | 0 |
| 5  | 5    | O    | 3  | 1.455080( 4) | 1  | 110.741( 11) | 2  | 0.000( 17)    | 0 |
| 6  | 6    | H    | 5  | 0.968550( 5) | 3  | 98.158( 12)  | 1  | 225.000( 18)  | 0 |
| 7  | 7    | H    | 2  | 1.084361( 6) | 1  | 107.561( 13) | 3  | 180.000( 19)  | 0 |
| 8  | 8    | H    | 2  | 1.087645( 7) | 1  | 110.275( 14) | 7  | 120.790( 20)  | 0 |
| 9  | 9    | H    | 2  | 1.086950( 8) | 1  | 110.461( 15) | 7  | -120.663( 21) | 0 |

-304.20177089 Energy CCSD(T)-F12/CVTA-F12

=====  
=====

Geometry (MP2/AVTZ) 148

Z-MATRIX (ANGSTROMS AND DEGREES)

| CD | Cent | Atom | N1 | Length/X     | N2 | Alpha/Y      | N3 | Beta/Z        | J |
|----|------|------|----|--------------|----|--------------|----|---------------|---|
| 1  | 1    | C    |    |              |    |              |    |               |   |
| 2  | 2    | C    | 1  | 1.496828( 1) |    |              |    |               |   |
| 3  | 3    | O    | 1  | 1.381698( 2) | 2  | 118.883( 9)  |    |               |   |
| 4  | 4    | O    | 1  | 1.203362( 3) | 2  | 125.977( 10) | 3  | 178.579( 16)  | 0 |
| 5  | 5    | O    | 3  | 1.454706( 4) | 1  | 111.816( 11) | 2  | 0.000( 17)    | 0 |
| 6  | 6    | H    | 5  | 0.968545( 5) | 3  | 98.140( 12)  | 1  | 225.000( 18)  | 0 |
| 7  | 7    | H    | 2  | 1.089826( 6) | 1  | 108.120( 13) | 3  | 270.000( 19)  | 0 |
| 8  | 8    | H    | 2  | 1.082009( 7) | 1  | 113.259( 14) | 7  | 120.925( 20)  | 0 |
| 9  | 9    | H    | 2  | 1.085753( 8) | 1  | 106.964( 15) | 7  | -116.006( 21) | 0 |

-304.20015502 Energy CCSD(T)-F12/CVTA-F12

=====  
=====

Geometry (MP2/AVTZ) 149

Z-MATRIX (ANGSTROMS AND DEGREES)

| CD | Cent | Atom | N1 | Length/X | N2 | Alpha/Y | N3 | Beta/Z | J |
|----|------|------|----|----------|----|---------|----|--------|---|
| 1  | 1    | C    |    |          |    |         |    |        |   |

```

2  2 C   1  1.499685(  1)
3  3 O   1  1.386883(  2)  2 120.001(  9)
4  4 O   1  1.202471(  3)  2 125.111( 10)  3 179.862( 16)  0
5  5 O   3  1.447588(  4)  1 114.073( 11)  2  0.000( 17)  0
6  6 H   5  0.969572(  5)  3 100.415( 12)  1 270.000( 18)  0
7  7 H   2  1.081059(  6)  1 114.234( 13)  3  0.000( 19)  0
8  8 H   2  1.088089(  7)  1 107.413( 14)  7 123.022( 20)  0
9  9 H   2  1.087933(  8)  1 107.049( 15)  7 -121.824( 21)  0

```

-----  
-304.19720489 Energy CCSD(T)-F12/CVTA-F12  
=====

=====  
Geometry (MP2/AVTZ) 150  
-----

Z-MATRIX (ANGSTROMS AND DEGREES)

| CD | Cent | Atom | N1 | Length/X     | N2 | Alpha/Y      | N3 | Beta/Z        | J |
|----|------|------|----|--------------|----|--------------|----|---------------|---|
| 1  | 1    | C    |    |              |    |              |    |               |   |
| 2  | 2    | C    | 1  | 1.498215( 1) |    |              |    |               |   |
| 3  | 3    | O    | 1  | 1.385743( 2) | 2  | 118.786( 9)  |    |               |   |
| 4  | 4    | O    | 1  | 1.202595( 3) | 2  | 125.948( 10) | 3  | 180.528( 16)  | 0 |
| 5  | 5    | O    | 3  | 1.447631( 4) | 1  | 113.079( 11) | 2  | 0.000( 17)    | 0 |
| 6  | 6    | H    | 5  | 0.969411( 5) | 3  | 100.516( 12) | 1  | 270.000( 18)  | 0 |
| 7  | 7    | H    | 2  | 1.090364( 6) | 1  | 108.661( 13) | 3  | 90.000( 19)   | 0 |
| 8  | 8    | H    | 2  | 1.085763( 7) | 1  | 106.835( 14) | 7  | 115.751( 20)  | 0 |
| 9  | 9    | H    | 2  | 1.082649( 8) | 1  | 113.003( 15) | 7  | -121.632( 21) | 0 |

-----  
-304.19883256 Energy CCSD(T)-F12/CVTA-F12  
=====

=====  
Geometry (MP2/AVTZ) 151  
-----

Z-MATRIX (ANGSTROMS AND DEGREES)

| CD | Cent | Atom | N1 | Length/X     | N2 | Alpha/Y      | N3 | Beta/Z        | J |
|----|------|------|----|--------------|----|--------------|----|---------------|---|
| 1  | 1    | C    |    |              |    |              |    |               |   |
| 2  | 2    | C    | 1  | 1.496865( 1) |    |              |    |               |   |
| 3  | 3    | O    | 1  | 1.384814( 2) | 2  | 117.878( 9)  |    |               |   |
| 4  | 4    | O    | 1  | 1.202487( 3) | 2  | 126.565( 10) | 3  | 179.701( 16)  | 0 |
| 5  | 5    | O    | 3  | 1.447721( 4) | 1  | 112.381( 11) | 2  | 0.000( 17)    | 0 |
| 6  | 6    | H    | 5  | 0.969392( 5) | 3  | 100.528( 12) | 1  | 270.000( 18)  | 0 |
| 7  | 7    | H    | 2  | 1.084469( 6) | 1  | 107.452( 13) | 3  | 180.000( 19)  | 0 |
| 8  | 8    | H    | 2  | 1.087083( 7) | 1  | 110.330( 14) | 7  | 121.048( 20)  | 0 |
| 9  | 9    | H    | 2  | 1.087869( 8) | 1  | 111.028( 15) | 7  | -119.903( 21) | 0 |

-----  
-304.19992990 Energy CCSD(T)-F12/CVTA-F12  
=====

=====  
Geometry (MP2/AVTZ) 152  
-----

Z-MATRIX (ANGSTROMS AND DEGREES)

| CD | Cent | Atom | N1 | Length/X     | N2 | Alpha/Y      | N3 | Beta/Z       | J |
|----|------|------|----|--------------|----|--------------|----|--------------|---|
| 1  | 1    | C    |    |              |    |              |    |              |   |
| 2  | 2    | C    | 1  | 1.498468( 1) |    |              |    |              |   |
| 3  | 3    | O    | 1  | 1.385209( 2) | 2  | 119.221( 9)  |    |              |   |
| 4  | 4    | O    | 1  | 1.202668( 3) | 2  | 125.575( 10) | 3  | 178.918( 16) | 0 |



|   |   |   |   |              |   |              |   |               |   |
|---|---|---|---|--------------|---|--------------|---|---------------|---|
| 5 | 5 | O | 3 | 1.447578( 4) | 1 | 113.287( 11) | 2 | 0.000( 17)    | 0 |
| 6 | 6 | H | 5 | 0.969459( 5) | 3 | 100.442( 12) | 1 | 270.000( 18)  | 0 |
| 7 | 7 | H | 2 | 1.089675( 6) | 1 | 108.012( 13) | 3 | 270.000( 19)  | 0 |
| 8 | 8 | H | 2 | 1.082240( 7) | 1 | 114.155( 14) | 7 | 120.783( 20)  | 0 |
| 9 | 9 | H | 2 | 1.085756( 8) | 1 | 106.930( 15) | 7 | -116.028( 21) | 0 |

-304.19820278 Energy CCSD(T)-F12/CVTA-F12

=====  
Geometry (MP2/AVTZ) 153

Z-MATRIX (ANGSTROMS AND DEGREES)

| CD | Cent | Atom | N1 | Length/X     | N2 | Alpha/Y      | N3 | Beta/Z        | J |
|----|------|------|----|--------------|----|--------------|----|---------------|---|
| 1  | 1    | C    |    |              |    |              |    |               |   |
| 2  | 2    | C    | 1  | 1.504016( 1) |    |              |    |               |   |
| 3  | 3    | O    | 1  | 1.378625( 2) | 2  | 120.853( 9)  |    |               |   |
| 4  | 4    | O    | 1  | 1.202985( 3) | 2  | 123.819( 10) | 3  | 180.278( 16)  | 0 |
| 5  | 5    | O    | 3  | 1.449563( 4) | 1  | 116.386( 11) | 2  | 0.000( 17)    | 0 |
| 6  | 6    | H    | 5  | 0.968656( 5) | 3  | 102.734( 12) | 1  | 315.000( 18)  | 0 |
| 7  | 7    | H    | 2  | 1.083265( 6) | 1  | 116.338( 13) | 3  | 0.000( 19)    | 0 |
| 8  | 8    | H    | 2  | 1.087641( 7) | 1  | 107.433( 14) | 7  | 123.861( 20)  | 0 |
| 9  | 9    | H    | 2  | 1.088006( 8) | 1  | 106.708( 15) | 7  | -121.010( 21) | 0 |

-304.19053125 Energy CCSD(T)-F12/CVTA-F12

=====  
Geometry (MP2/AVTZ) 154

Z-MATRIX (ANGSTROMS AND DEGREES)

| CD | Cent | Atom | N1 | Length/X     | N2 | Alpha/Y      | N3 | Beta/Z        | J |
|----|------|------|----|--------------|----|--------------|----|---------------|---|
| 1  | 1    | C    |    |              |    |              |    |               |   |
| 2  | 2    | C    | 1  | 1.501622( 1) |    |              |    |               |   |
| 3  | 3    | O    | 1  | 1.379182( 2) | 2  | 118.866( 9)  |    |               |   |
| 4  | 4    | O    | 1  | 1.202847( 3) | 2  | 125.373( 10) | 3  | 181.046( 16)  | 0 |
| 5  | 5    | O    | 3  | 1.450047( 4) | 1  | 115.305( 11) | 2  | 0.000( 17)    | 0 |
| 6  | 6    | H    | 5  | 0.969424( 5) | 3  | 102.887( 12) | 1  | 315.000( 18)  | 0 |
| 7  | 7    | H    | 2  | 1.091177( 6) | 1  | 109.172( 13) | 3  | 90.000( 19)   | 0 |
| 8  | 8    | H    | 2  | 1.085761( 7) | 1  | 106.668( 14) | 7  | 115.265( 20)  | 0 |
| 9  | 9    | H    | 2  | 1.084822( 8) | 1  | 113.367( 15) | 7  | -123.523( 21) | 0 |

-304.19289240 Energy CCSD(T)-F12/CVTA-F12

=====  
Geometry (MP2/AVTZ) 155

Z-MATRIX (ANGSTROMS AND DEGREES)

| CD | Cent | Atom | N1 | Length/X     | N2 | Alpha/Y      | N3 | Beta/Z       | J |
|----|------|------|----|--------------|----|--------------|----|--------------|---|
| 1  | 1    | C    |    |              |    |              |    |              |   |
| 2  | 2    | C    | 1  | 1.500323( 1) |    |              |    |              |   |
| 3  | 3    | O    | 1  | 1.378166( 2) | 2  | 118.141( 9)  |    |              |   |
| 4  | 4    | O    | 1  | 1.202903( 3) | 2  | 125.884( 10) | 3  | 180.172( 16) | 0 |
| 5  | 5    | O    | 3  | 1.449579( 4) | 1  | 114.839( 11) | 2  | 0.000( 17)   | 0 |
| 6  | 6    | H    | 5  | 0.968927( 5) | 3  | 102.956( 12) | 1  | 315.000( 18) | 0 |
| 7  | 7    | H    | 2  | 1.084283( 6) | 1  | 107.392( 13) | 3  | 180.000( 19) | 0 |

|   |   |   |   |              |   |              |   |               |   |
|---|---|---|---|--------------|---|--------------|---|---------------|---|
| 8 | 8 | H | 2 | 1.087599( 7) | 1 | 110.660( 14) | 7 | 121.278( 20)  | 0 |
| 9 | 9 | H | 2 | 1.091261( 8) | 1 | 111.545( 15) | 7 | -118.034( 21) | 0 |

-----  
-304.19383933 Energy CCSD(T)-F12/CVTA-F12  
=====

=====  
Geometry (MP2/AVTZ) 156  
-----

| Z-MATRIX (ANGSTROMS AND DEGREES) |      |      |    |              |    |              |    |               |   |
|----------------------------------|------|------|----|--------------|----|--------------|----|---------------|---|
| CD                               | Cent | Atom | N1 | Length/X     | N2 | Alpha/Y      | N3 | Beta/Z        | J |
| 1                                | 1    | C    |    |              |    |              |    |               |   |
| 2                                | 2    | C    | 1  | 1.503099( 1) |    |              |    |               |   |
| 3                                | 3    | O    | 1  | 1.377174( 2) | 2  | 120.127( 9)  |    |               |   |
| 4                                | 4    | O    | 1  | 1.203224( 3) | 2  | 124.322( 10) | 3  | 179.069( 16)  | 0 |
| 5                                | 5    | O    | 3  | 1.449034( 4) | 1  | 115.838( 11) | 2  | 0.000( 17)    | 0 |
| 6                                | 6    | H    | 5  | 0.968129( 5) | 3  | 102.836( 12) | 1  | 315.000( 18)  | 0 |
| 7                                | 7    | H    | 2  | 1.089437( 6) | 1  | 108.065( 13) | 3  | 270.000( 19)  | 0 |
| 8                                | 8    | H    | 2  | 1.085164( 7) | 1  | 116.318( 14) | 7  | 122.153( 20)  | 0 |
| 9                                | 9    | H    | 2  | 1.085585( 8) | 1  | 106.528( 15) | 7  | -115.860( 21) | 0 |

-----  
-304.19140824 Energy CCSD(T)-F12/CVTA-F12  
=====
